# Supplementary material
Source: MDPI journal article supplement (https://www.mdpi.com/1424-8247/16/2/229)
Supplement: s1 [file s1]

# Discovery of New Boswellic Acid Hybrid 1*H*-1,2,3-Triazoles for Diabetic Management: In Vitro and In Silico Studies

Najeeb Ur Rehman <sup>1</sup>, Saeed Ullah <sup>1</sup>, Tanveer Alam <sup>1</sup>, Sobia Ahsan Halim <sup>1</sup>, Tapan Kumar Mohanta <sup>1</sup>, Ajmal Khan <sup>1</sup>, Muhammad U. Anwar <sup>1</sup>, René Csuk <sup>2</sup>, Satya Kumar Avula <sup>1,\*</sup> and Ahmed Al-Harrasi <sup>1,\*</sup>

<sup>1</sup> Natural & Medical Sciences Research Center, University of Nizwa, Nizwa 616, Oman

<sup>2</sup> Organic Chemistry, Martin-Luther-University Halle-Wittenberg, Kurt-Mothes-Str. 2, D-06120 Halle (Saale), Germany

\* Correspondence: chemisatya@unizwa.edu.om (S.K.A.); aharrasi@unizwa.edu.om (A.A.-H.)

## Contents

| Table of Contents Page                                                                              | Page |
|-----------------------------------------------------------------------------------------------------|------|
| <b>Figure S1:</b> <sup>1</sup> H-NMR spectrum (600 MHz, CDCl <sub>3</sub> ) of compound <b>3</b>    | 6    |
| <b>Figure S2:</b> <sup>13</sup> C-NMR spectrum (150 MHz, CDCl <sub>3</sub> ) of compound <b>3</b>   | 7    |
| <b>Figure S3:</b> HRMS spectrum of compound <b>3</b>                                                | 8    |
| <b>Figure S4:</b> <sup>1</sup> H-NMR spectrum (600 MHz, CDCl <sub>3</sub> ) of compound <b>4</b>    | 9    |
| <b>Figure S5:</b> <sup>13</sup> C-NMR spectrum (150 MHz, CDCl <sub>3</sub> ) of compound <b>4</b>   | 10   |
| <b>Figure S6:</b> HRMS spectrum of compound <b>4</b>                                                | 11   |
| <b>Figure S7:</b> <sup>1</sup> H-NMR spectrum (600 MHz, CDCl <sub>3</sub> ) of compound <b>6a</b>   | 12   |
| <b>Figure S8:</b> <sup>13</sup> C-NMR spectrum (150 MHz, CDCl <sub>3</sub> ) of compound <b>6a</b>  | 13   |
| <b>Figure S9:</b> HRMS spectrum of compound <b>6a</b>                                               | 14   |
| <b>Figure S10:</b> <sup>1</sup> H-NMR spectrum (600 MHz, CDCl <sub>3</sub> ) of compound <b>6b</b>  | 15   |
| <b>Figure S11:</b> <sup>13</sup> C-NMR spectrum (150 MHz, CDCl <sub>3</sub> ) of compound <b>6b</b> | 16   |
| <b>Figure S12:</b> HRMS spectrum of compound <b>6b</b>                                              | 17   |
| <b>Figure S13:</b> <sup>1</sup> H-NMR spectrum (600 MHz, CDCl <sub>3</sub> ) of compound <b>6c</b>  | 18   |
| <b>Figure S14:</b> <sup>13</sup> C-NMR spectrum (150 MHz, CDCl <sub>3</sub> ) of compound <b>6c</b> | 19   |
| <b>Figure S15:</b> HRMS spectrum of compound <b>6c</b>                                              | 20   |
| <b>Figure S16:</b> <sup>1</sup> H-NMR spectrum (600 MHz, CDCl <sub>3</sub> ) of compound <b>6d</b>  | 21   |
| <b>Figure S17:</b> <sup>13</sup> C-NMR spectrum (150 MHz, CDCl <sub>3</sub> ) of compound <b>6d</b> | 22   |
| <b>Figure S18:</b> <sup>19</sup> F-NMR spectrum (564 MHz, CDCl <sub>3</sub> ) of compound <b>6d</b> | 23   |
| <b>Figure S19:</b> HRMS spectrum of compound <b>6d</b>                                              | 24   |

|                                                                                                     |    |
|-----------------------------------------------------------------------------------------------------|----|
| <b>Figure S20:</b> <sup>1</sup> H-NMR spectrum (600 MHz, CDCl <sub>3</sub> ) of compound <b>6e</b>  | 25 |
| <b>Figure S21:</b> <sup>13</sup> C-NMR spectrum (150 MHz, CDCl <sub>3</sub> ) of compound <b>6e</b> | 26 |
| <b>Figure S22:</b> HRMS spectrum of compound <b>6e</b>                                              | 27 |
| <b>Figure S23:</b> <sup>1</sup> H-NMR spectrum (600 MHz, CDCl <sub>3</sub> ) of compound <b>6f</b>  | 28 |
| <b>Figure S24:</b> <sup>13</sup> C-NMR spectrum (150 MHz, CDCl <sub>3</sub> ) of compound <b>6f</b> | 29 |
| <b>Figure S25:</b> <sup>19</sup> F-NMR spectrum (564 MHz, CDCl <sub>3</sub> ) of compound <b>6f</b> | 30 |
| <b>Figure S26:</b> HRMS spectrum of compound <b>6f</b>                                              | 31 |
| <b>Figure S27:</b> <sup>1</sup> H-NMR spectrum (600 MHz, CDCl <sub>3</sub> ) of compound <b>6g</b>  | 32 |
| <b>Figure S28:</b> <sup>13</sup> C-NMR spectrum (150 MHz, CDCl <sub>3</sub> ) of compound <b>6g</b> | 33 |
| <b>Figure S29:</b> HRMS spectrum of compound <b>6g</b>                                              | 34 |
| <b>Figure S30:</b> <sup>1</sup> H-NMR spectrum (600 MHz, CDCl <sub>3</sub> ) of compound <b>6h</b>  | 35 |
| <b>Figure S31:</b> <sup>13</sup> C-NMR spectrum (150 MHz, CDCl <sub>3</sub> ) of compound <b>6h</b> | 36 |
| <b>Figure S32:</b> HRMS spectrum of compound <b>6h</b>                                              | 37 |
| <b>Figure S33:</b> <sup>1</sup> H-NMR spectrum (600 MHz, CDCl <sub>3</sub> ) of compound <b>6i</b>  | 38 |
| <b>Figure S34:</b> <sup>13</sup> C-NMR spectrum (150 MHz, CDCl <sub>3</sub> ) of compound <b>6i</b> | 39 |
| <b>Figure S35:</b> HRMS spectrum of compound <b>6i</b>                                              | 40 |
| <b>Figure S36:</b> <sup>1</sup> H-NMR spectrum (600 MHz, CDCl <sub>3</sub> ) of compound <b>6j</b>  | 41 |
| <b>Figure S37:</b> <sup>13</sup> C-NMR spectrum (150 MHz, CDCl <sub>3</sub> ) of compound <b>6j</b> | 42 |
| <b>Figure S38:</b> <sup>19</sup> F-NMR spectrum (564 MHz, CDCl <sub>3</sub> ) of compound <b>6j</b> | 43 |
| <b>Figure S39:</b> HRMS spectrum of compound <b>6j</b>                                              | 44 |
| <b>Figure S40:</b> <sup>1</sup> H-NMR spectrum (600 MHz, CDCl <sub>3</sub> ) of compound <b>6k</b>  | 45 |

|                                                                                                    |    |
|----------------------------------------------------------------------------------------------------|----|
| <b>Figure S41:</b> $^{13}\text{C}$ -NMR spectrum (150 MHz, $\text{CDCl}_3$ ) of compound <b>6k</b> | 46 |
| <b>Figure S42:</b> $^{19}\text{F}$ -NMR spectrum (564 MHz, $\text{CDCl}_3$ ) of compound <b>6k</b> | 47 |
| <b>Figure S43:</b> HRMS spectrum of compound <b>6k</b>                                             | 48 |
| <b>Figure S44:</b> $^1\text{H}$ -NMR spectrum (600 MHz, $\text{CDCl}_3$ ) of compound <b>7a</b>    | 49 |
| <b>Figure S45:</b> $^{13}\text{C}$ -NMR spectrum (150 MHz, $\text{CDCl}_3$ ) of compound <b>7a</b> | 50 |
| <b>Figure S46:</b> HRMS spectrum of compound <b>7a</b>                                             | 51 |
| <b>Figure S47:</b> $^1\text{H}$ -NMR spectrum (600 MHz, $\text{CDCl}_3$ ) of compound <b>7b</b>    | 52 |
| <b>Figure S48:</b> $^{13}\text{C}$ -NMR spectrum (150 MHz, $\text{CDCl}_3$ ) of compound <b>7b</b> | 53 |
| <b>Figure S49:</b> HRMS spectrum of compound <b>7b</b>                                             | 54 |
| <b>Figure S50:</b> $^1\text{H}$ -NMR spectrum (600 MHz, $\text{CDCl}_3$ ) of compound <b>7c</b>    | 55 |
| <b>Figure S51:</b> $^{13}\text{C}$ -NMR spectrum (150 MHz, $\text{CDCl}_3$ ) of compound <b>7c</b> | 56 |
| <b>Figure S52:</b> HRMS spectrum of compound <b>7c</b>                                             | 57 |
| <b>Figure S53:</b> $^1\text{H}$ -NMR spectrum (600 MHz, $\text{CDCl}_3$ ) of compound <b>7d</b>    | 58 |
| <b>Figure S54:</b> $^{13}\text{C}$ -NMR spectrum (150 MHz, $\text{CDCl}_3$ ) of compound <b>7d</b> | 59 |
| <b>Figure S55:</b> $^{19}\text{F}$ -NMR spectrum (564 MHz, $\text{CDCl}_3$ ) of compound <b>7d</b> | 60 |
| <b>Figure S56:</b> HRMS spectrum of compound <b>7d</b>                                             | 61 |
| <b>Figure S57:</b> $^1\text{H}$ -NMR spectrum (600 MHz, $\text{CDCl}_3$ ) of compound <b>7e</b>    | 62 |
| <b>Figure S58:</b> $^{13}\text{C}$ -NMR spectrum (150 MHz, $\text{CDCl}_3$ ) of compound <b>7e</b> | 63 |
| <b>Figure S59:</b> HRMS spectrum of compound <b>7e</b>                                             | 64 |
| <b>Figure S60:</b> $^1\text{H}$ -NMR spectrum (600 MHz, $\text{CDCl}_3$ ) of compound <b>7f</b>    | 65 |
| <b>Figure S61:</b> $^{13}\text{C}$ -NMR spectrum (150 MHz, $\text{CDCl}_3$ ) of compound <b>7f</b> | 66 |

|                                                                                                    |    |
|----------------------------------------------------------------------------------------------------|----|
| <b>Figure S62:</b> $^{19}\text{F}$ -NMR spectrum (564 MHz, $\text{CDCl}_3$ ) of compound <b>7f</b> | 67 |
| <b>Figure S63:</b> HRMS spectrum of compound <b>7f</b>                                             | 68 |
| <b>Figure S64:</b> $^1\text{H}$ -NMR spectrum (600 MHz, $\text{CDCl}_3$ ) of compound <b>7g</b>    | 69 |
| <b>Figure S65:</b> $^{13}\text{C}$ -NMR spectrum (150 MHz, $\text{CDCl}_3$ ) of compound <b>7g</b> | 70 |
| <b>Figure S66:</b> HRMS spectrum of compound <b>7g</b>                                             | 71 |
| <b>Figure S67:</b> $^1\text{H}$ -NMR spectrum (600 MHz, $\text{CDCl}_3$ ) of compound <b>7h</b>    | 72 |
| <b>Figure S68:</b> $^{13}\text{C}$ -NMR spectrum (150 MHz, $\text{CDCl}_3$ ) of compound <b>7h</b> | 73 |
| <b>Figure S69:</b> HRMS spectrum of compound <b>7h</b>                                             | 74 |
| <b>Figure S70:</b> $^1\text{H}$ -NMR spectrum (600 MHz, $\text{CDCl}_3$ ) of compound <b>7i</b>    | 75 |
| <b>Figure S71:</b> $^{13}\text{C}$ -NMR spectrum (150 MHz, $\text{CDCl}_3$ ) of compound <b>7i</b> | 76 |
| <b>Figure S72:</b> HRMS spectrum of compound <b>7i</b>                                             | 77 |
| <b>Figure S73:</b> $^1\text{H}$ -NMR spectrum (600 MHz, $\text{CDCl}_3$ ) of compound <b>7j</b>    | 78 |
| <b>Figure S74:</b> $^{13}\text{C}$ -NMR spectrum (150 MHz, $\text{CDCl}_3$ ) of compound <b>7j</b> | 79 |
| <b>Figure S75:</b> $^{19}\text{F}$ -NMR spectrum (564 MHz, $\text{CDCl}_3$ ) of compound <b>7j</b> | 80 |
| <b>Figure S76:</b> HRMS spectrum of compound <b>7j</b>                                             | 81 |
| <b>Figure S77:</b> $^1\text{H}$ -NMR spectrum (600 MHz, $\text{CDCl}_3$ ) of compound <b>7k</b>    | 82 |
| <b>Figure S78:</b> $^{13}\text{C}$ -NMR spectrum (150 MHz, $\text{CDCl}_3$ ) of compound <b>7k</b> | 83 |
| <b>Figure S79:</b> $^{19}\text{F}$ -NMR spectrum (564 MHz, $\text{CDCl}_3$ ) of compound <b>7k</b> | 84 |
| <b>Figure S80:</b> HRMS spectrum of compound <b>7k</b>                                             | 85 |

03-Feb-2020.3.fid  
Dr. Kumar/SK-AKBA-Propargyl/CDCI3  
PROTON

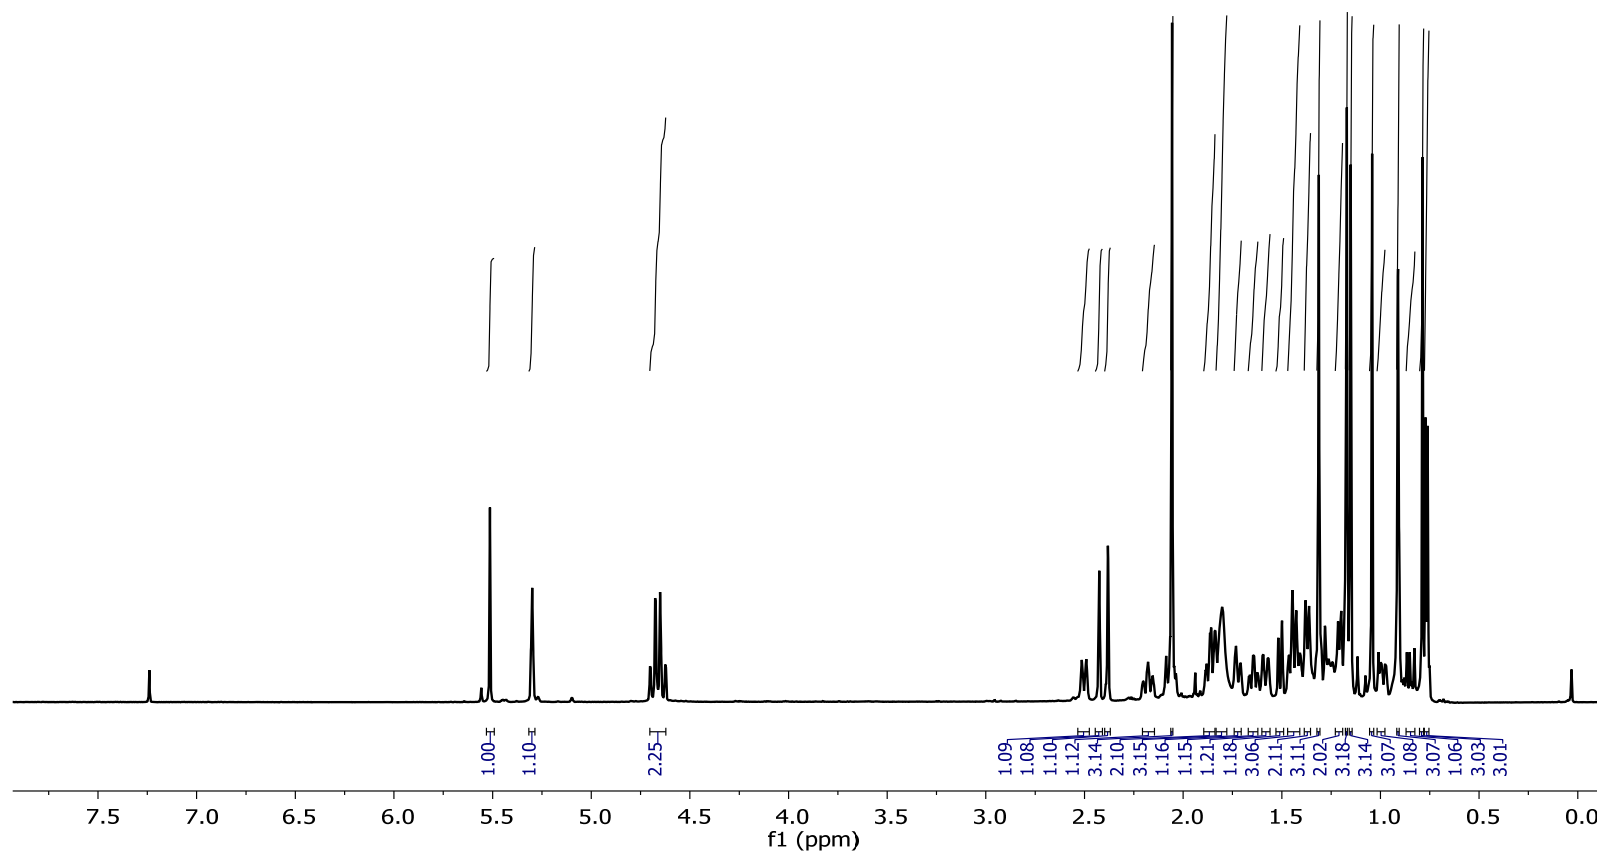

**Figure S1:**  $^1\text{H}$ -NMR spectrum (600 MHz,  $\text{CDCl}_3$ ) of compound 3

03-Feb-2020.5.fid  
Dr. Kumar/SK-AKBA-Propargyl/CDCl<sub>3</sub>  
C13CPD

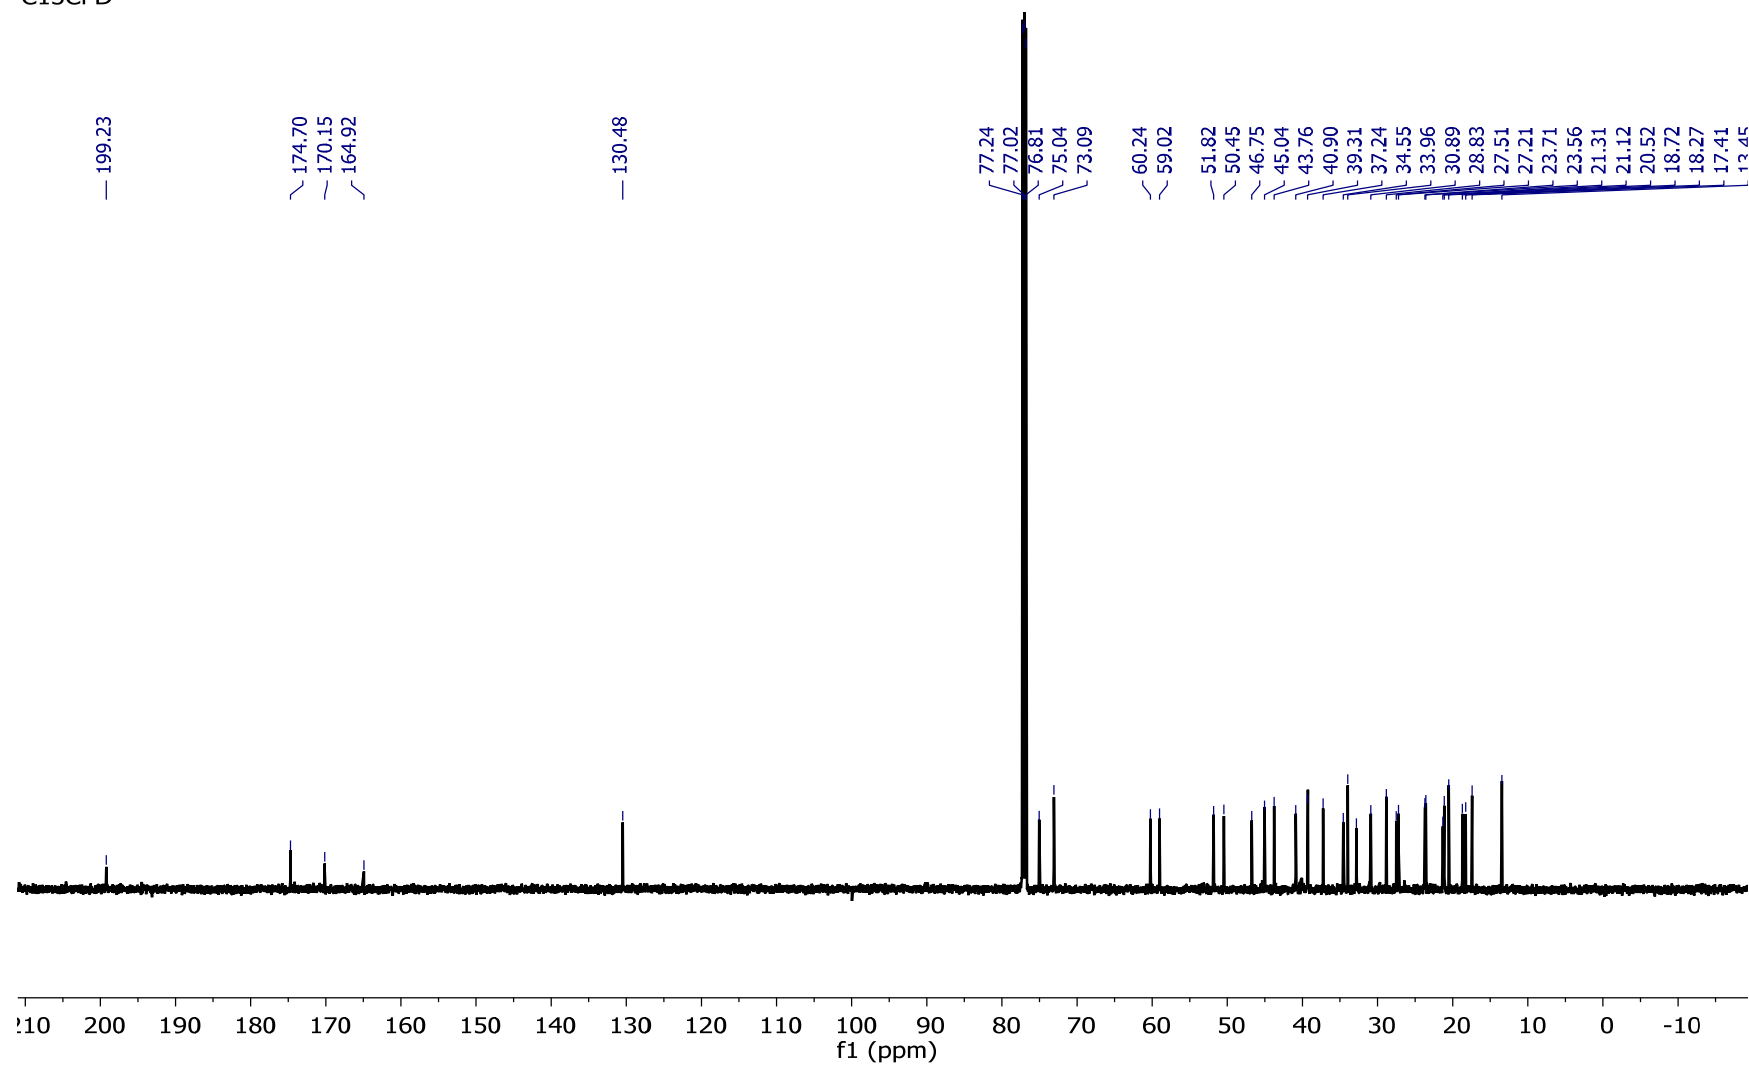

Figure S2: <sup>13</sup>C-NMR spectrum (150 MHz, CDCl<sub>3</sub>) of compound 3

|                    |                          |                               |         |                        |                       |
|--------------------|--------------------------|-------------------------------|---------|------------------------|-----------------------|
| <b>Sample Name</b> | SK-AKBA-PROP             | <b>Position</b>               | Vial 21 | <b>Instrument Name</b> | Instrument 1          |
| <b>User Name</b>   |                          | <b>Inj Vol</b>                | 2       | <b>InjPosition</b>     |                       |
| <b>Sample Type</b> | Sample                   | <b>IRM Calibration Status</b> | Success | <b>Data Filename</b>   | SK-AKBA-PROP_POS_01.d |
| <b>ACQ Method</b>  | POSITIVE ION METHOD MS.m | <b>Comment</b>                | SK      | <b>Acquired Time</b>   | 18-Oct-20 12:57:03 PM |

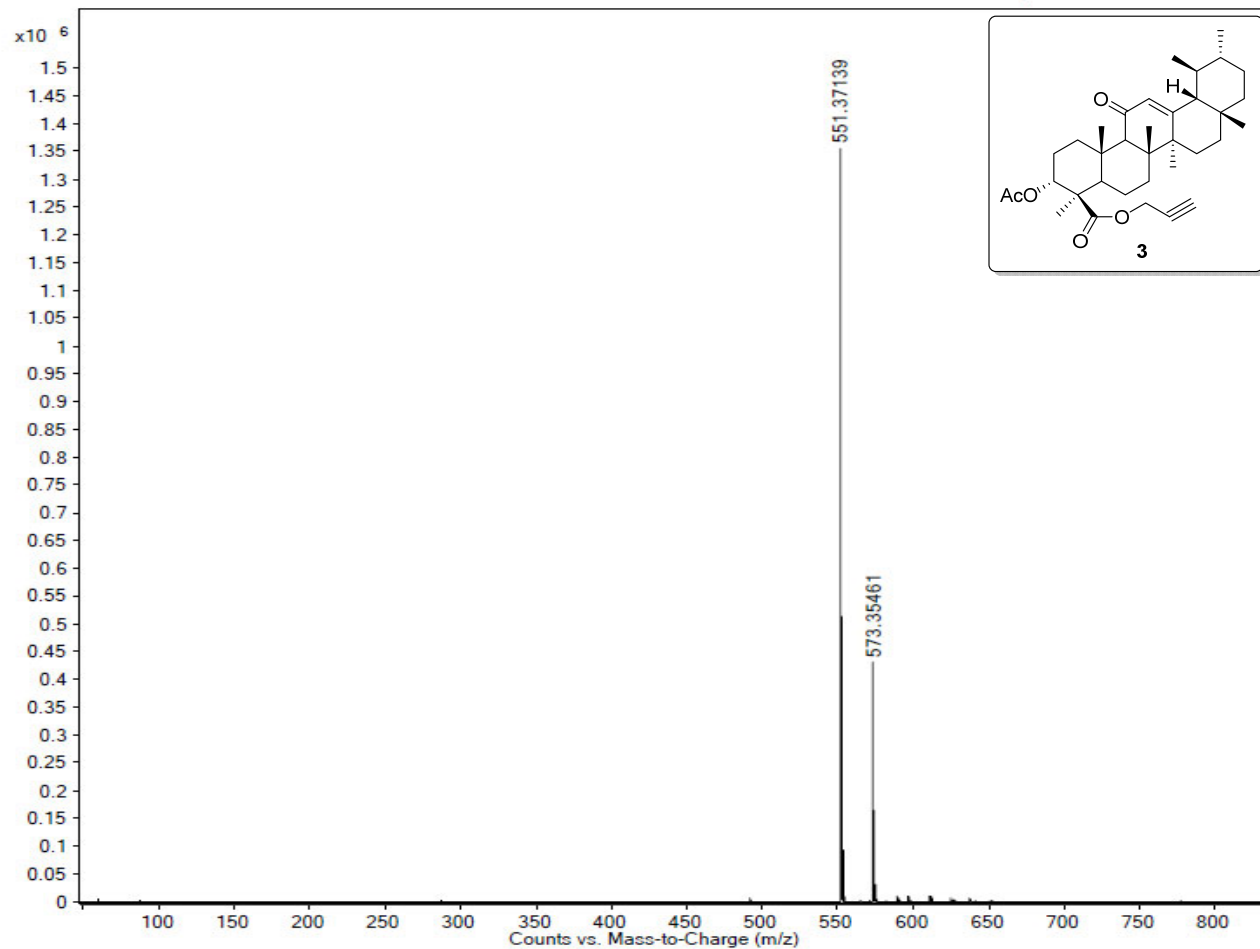

**Figure S3:** HRMS spectrum of compound 3



21-Feb-2021.1.fid  
Dr. A. Satya Kumar / SK-KBA-Prop (4) / CDCl<sub>3</sub>  
PROTON

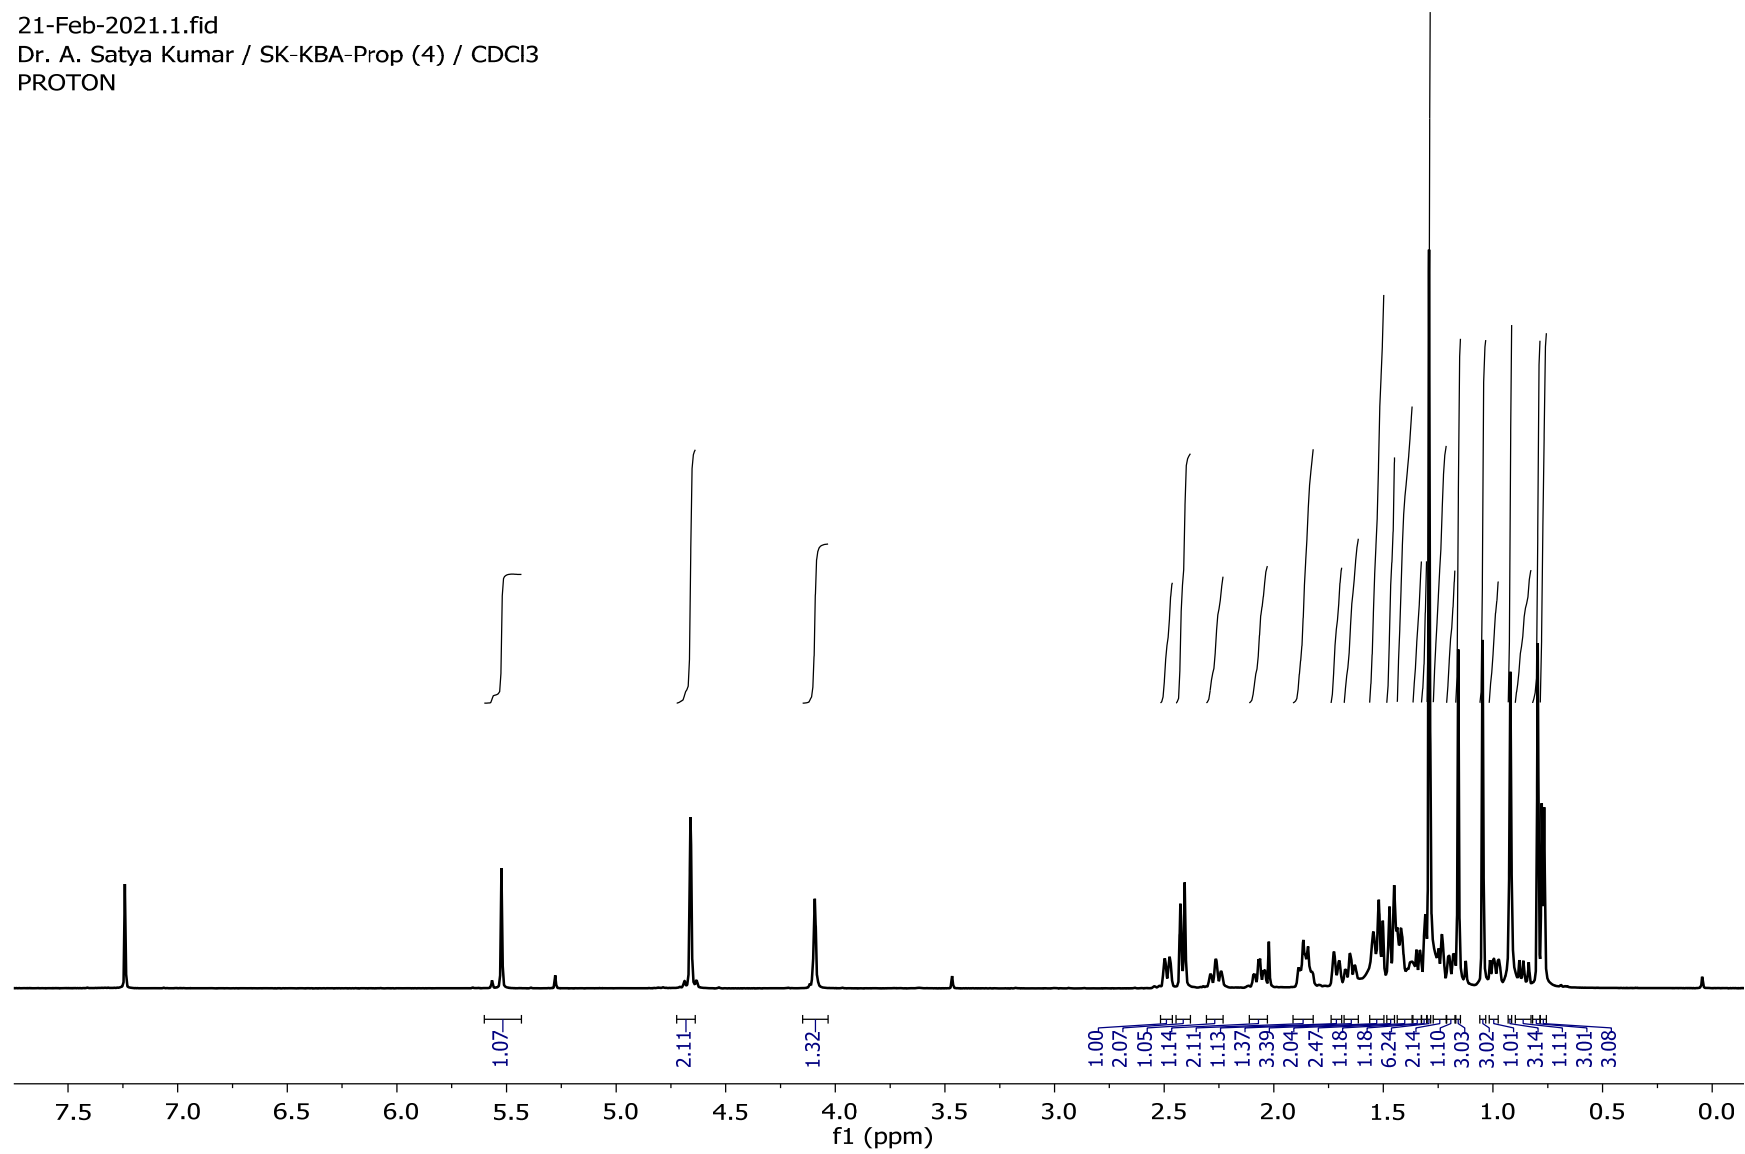

Figure S4: <sup>1</sup>H-NMR spectrum (600 MHz, CDCl<sub>3</sub>) of compound 4

21-Feb-2021.2.fid  
Dr. A. Satya Kumar / SK-KBA-Prop (4) / CDCl<sub>3</sub>  
C13CPD

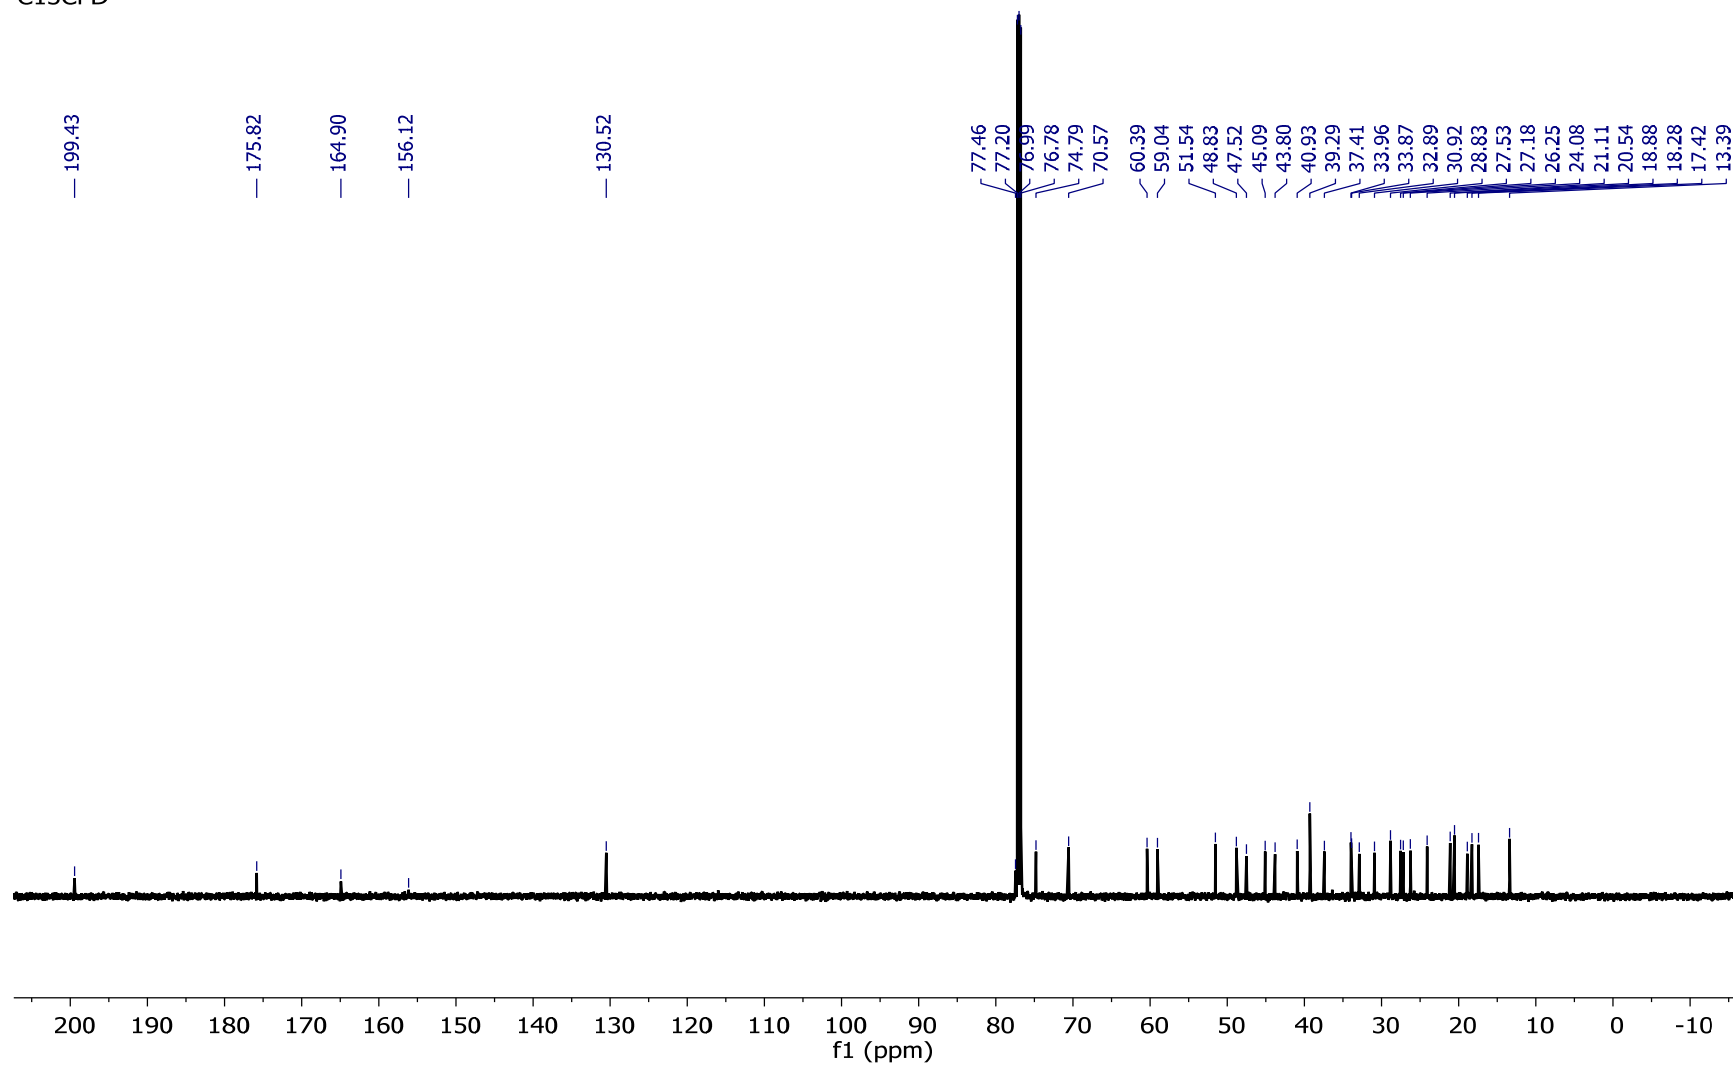

Figure S5: <sup>13</sup>C-NMR spectrum (150 MHz, CDCl<sub>3</sub>) of compound 4

|             |                          |                        |         |                 |                       |
|-------------|--------------------------|------------------------|---------|-----------------|-----------------------|
| Sample Name | KBA-PRO-A                | Position               | Vial 62 | Instrument Name | Instrument 1          |
| User Name   |                          | Inj Vol                | 2       | InjPosition     |                       |
| Sample Type | Sample                   | IRM Calibration Status | Success | Data Filename   | KBA-PRO-A_POS.d       |
| ACQ Method  | POSITIVE ION METHOD MS.m | Comment                |         | Acquired Time   | 24-Feb-21 12:20:31 PM |

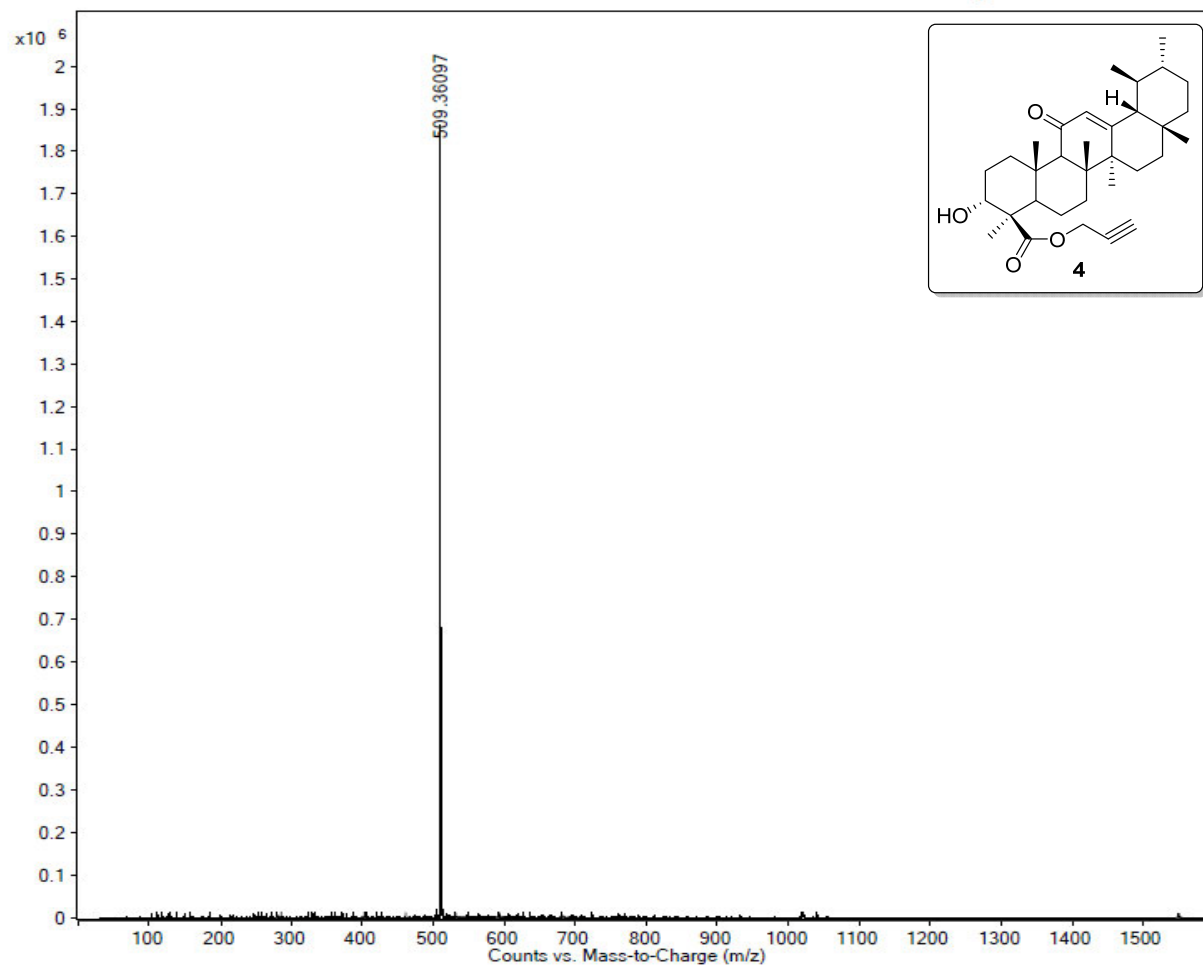

Figure S6: HRMS spectrum of compound 4

11-Nov-2020.6.fid  
Dr. Kumar/SK-AKBA-4a-(1)/CDCl<sub>3</sub>  
PROTON

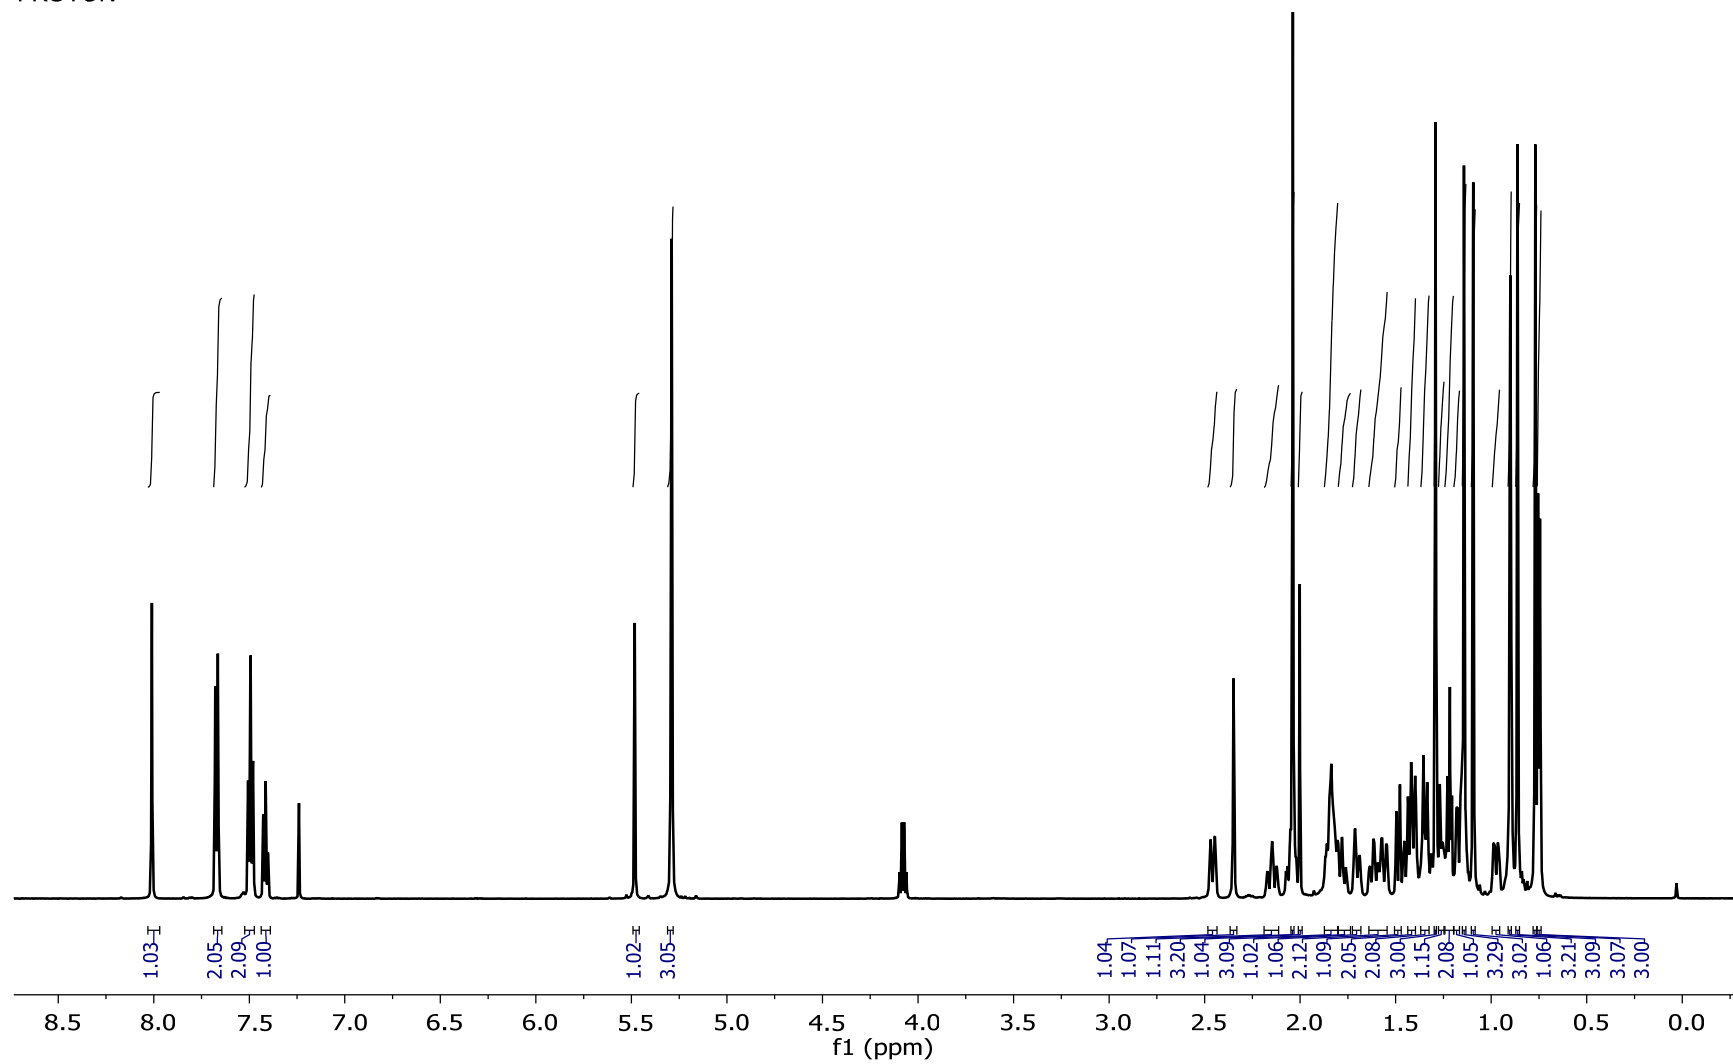

Figure S7: <sup>1</sup>H-NMR spectrum (600 MHz, CDCl<sub>3</sub>) of compound 6a

11-Nov-2020.7.fid  
Dr. Kumar/SK-AKBA-4a-(1)/CDCl<sub>3</sub>  
C13CPD

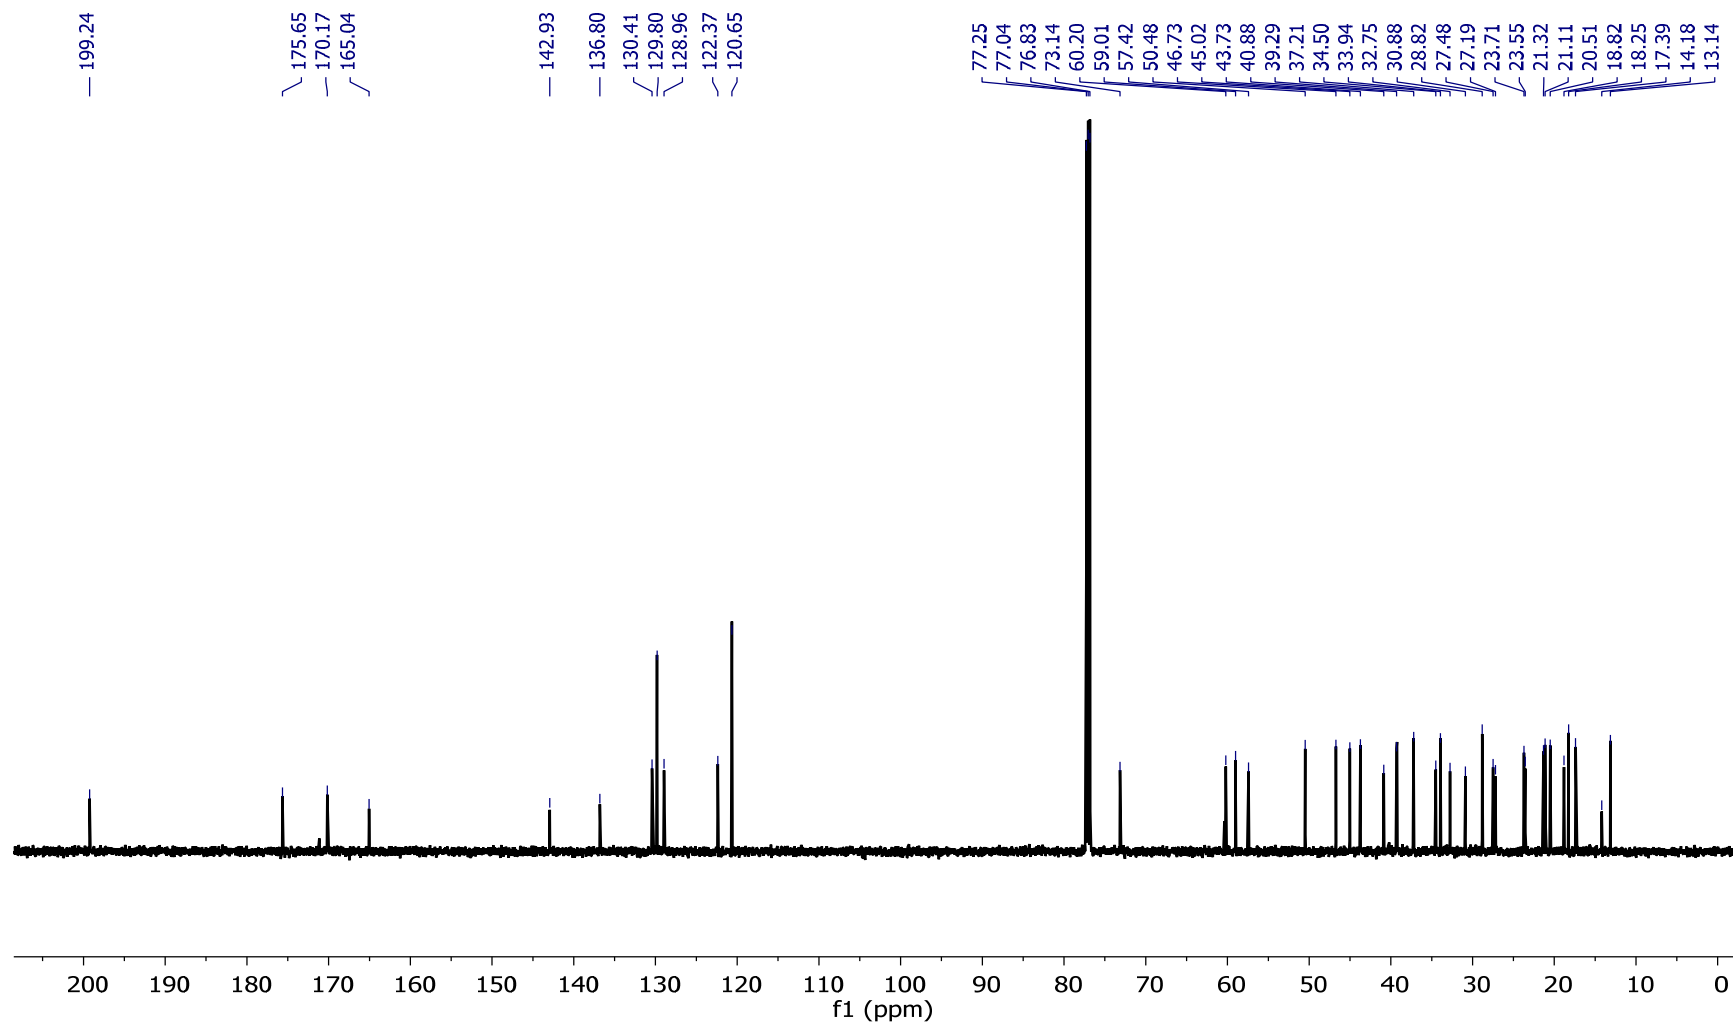

Figure S8: <sup>13</sup>C-NMR spectrum (150 MHz, CDCl<sub>3</sub>) of compound 6a

|             |                          |                        |         |                 |                      |
|-------------|--------------------------|------------------------|---------|-----------------|----------------------|
| Sample Name | SK-AKBA-4A               | Position               | Vial 14 | Instrument Name | Instrument 1         |
| User Name   |                          | Inj Vol                | 2       | InjPosition     |                      |
| Sample Type | Sample                   | IRM Calibration Status | Success | Data Filename   | SK-AKBA-4A_POS_01.d  |
| ACQ Method  | POSITIVE ION METHOD MS.m | Comment                | SK      | Acquired Time   | 11-Nov-20 3:19:42 PM |

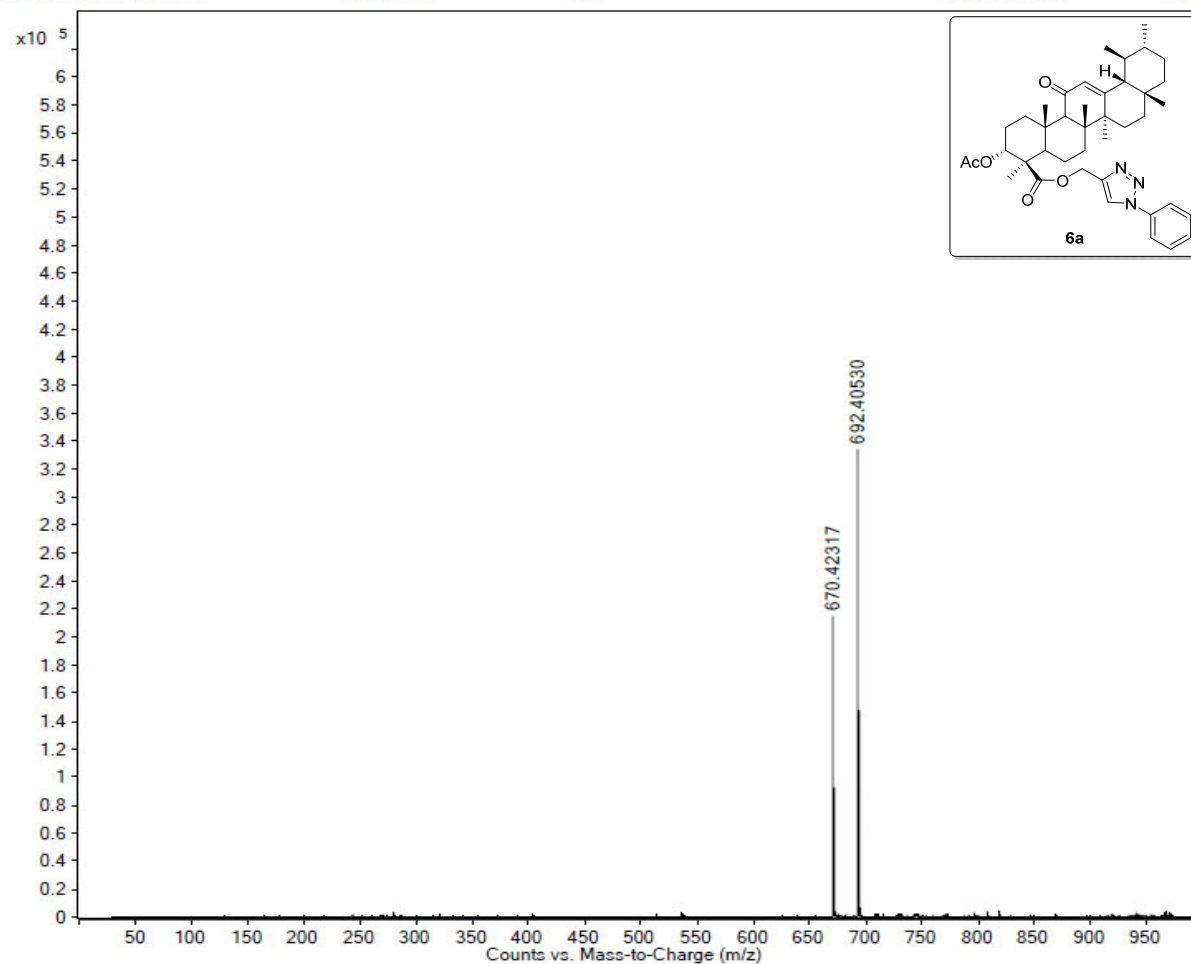

Figure S9: HRMS spectrum of compound 6a

15-Nov-2020.6.fid  
Dr. Kumar/SK-AKBA-4b(1)/CDCl<sub>3</sub>  
PROTON

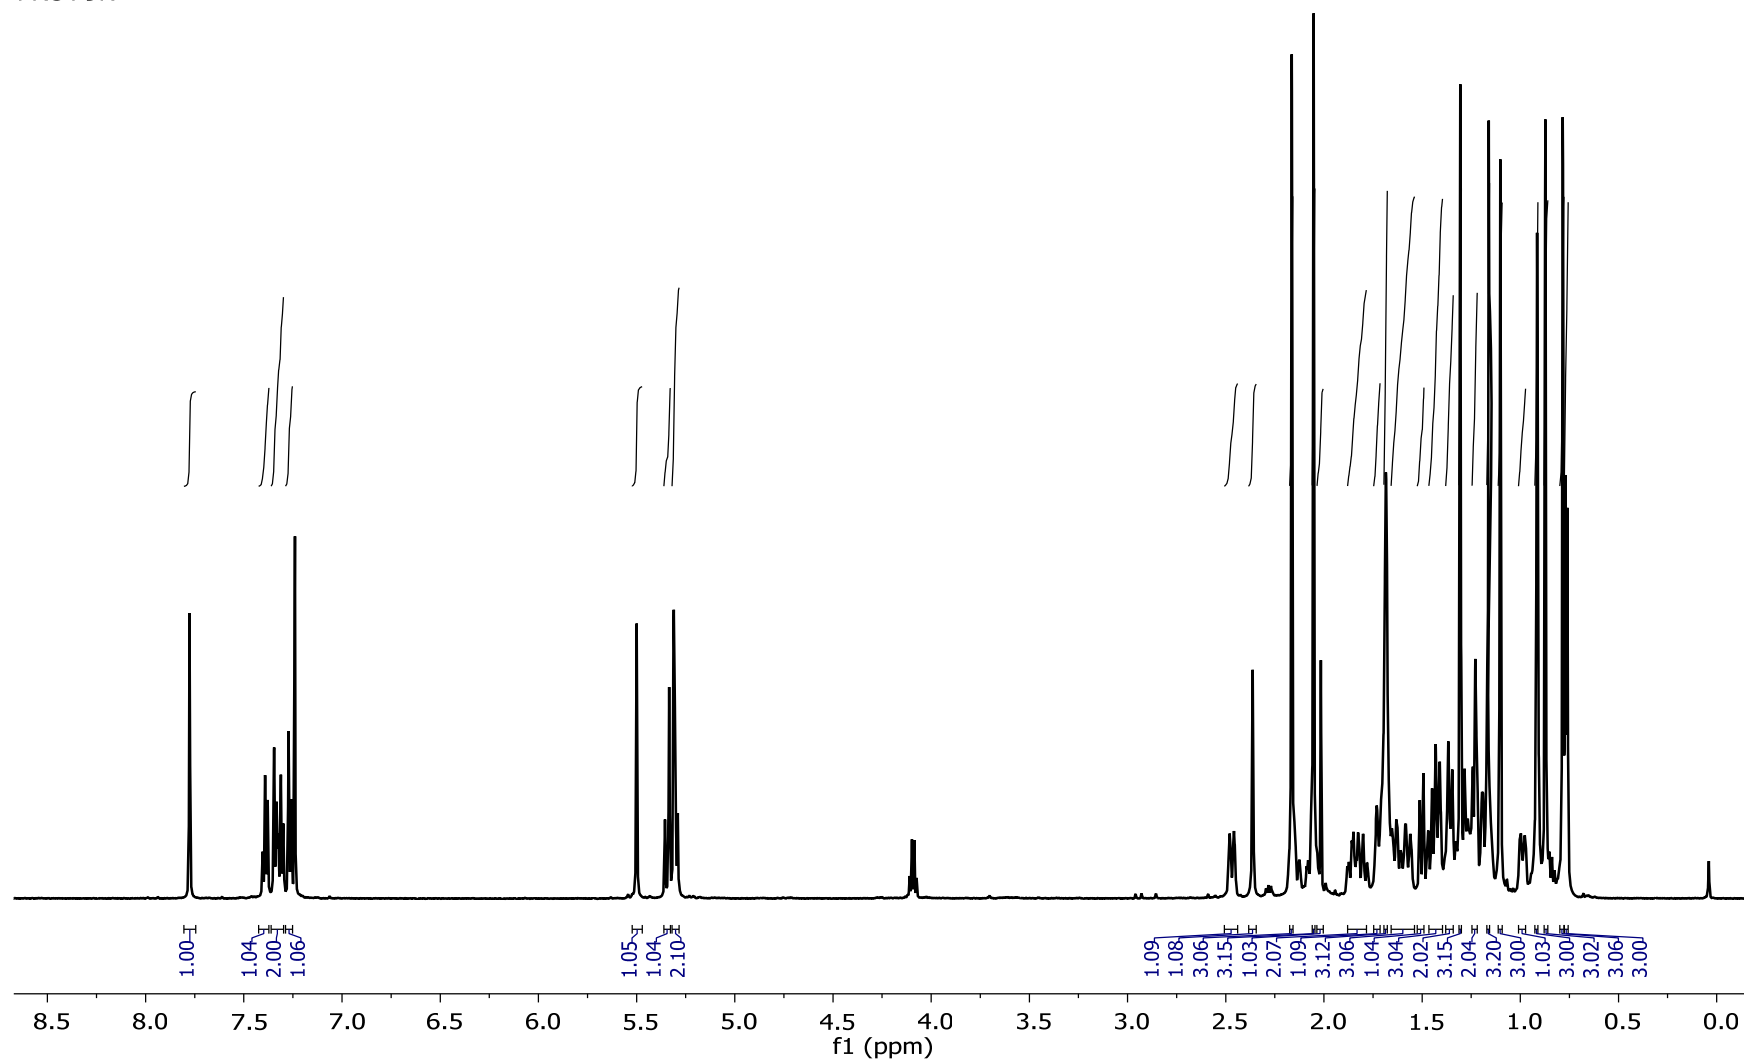

Figure S10: <sup>1</sup>H-NMR spectrum (600 MHz, CDCl<sub>3</sub>) of compound **6b**

15-Nov-2020.7.fid  
Dr. Kumar/SK-AKBA-4b(1)/CDCl<sub>3</sub>  
C13CPD

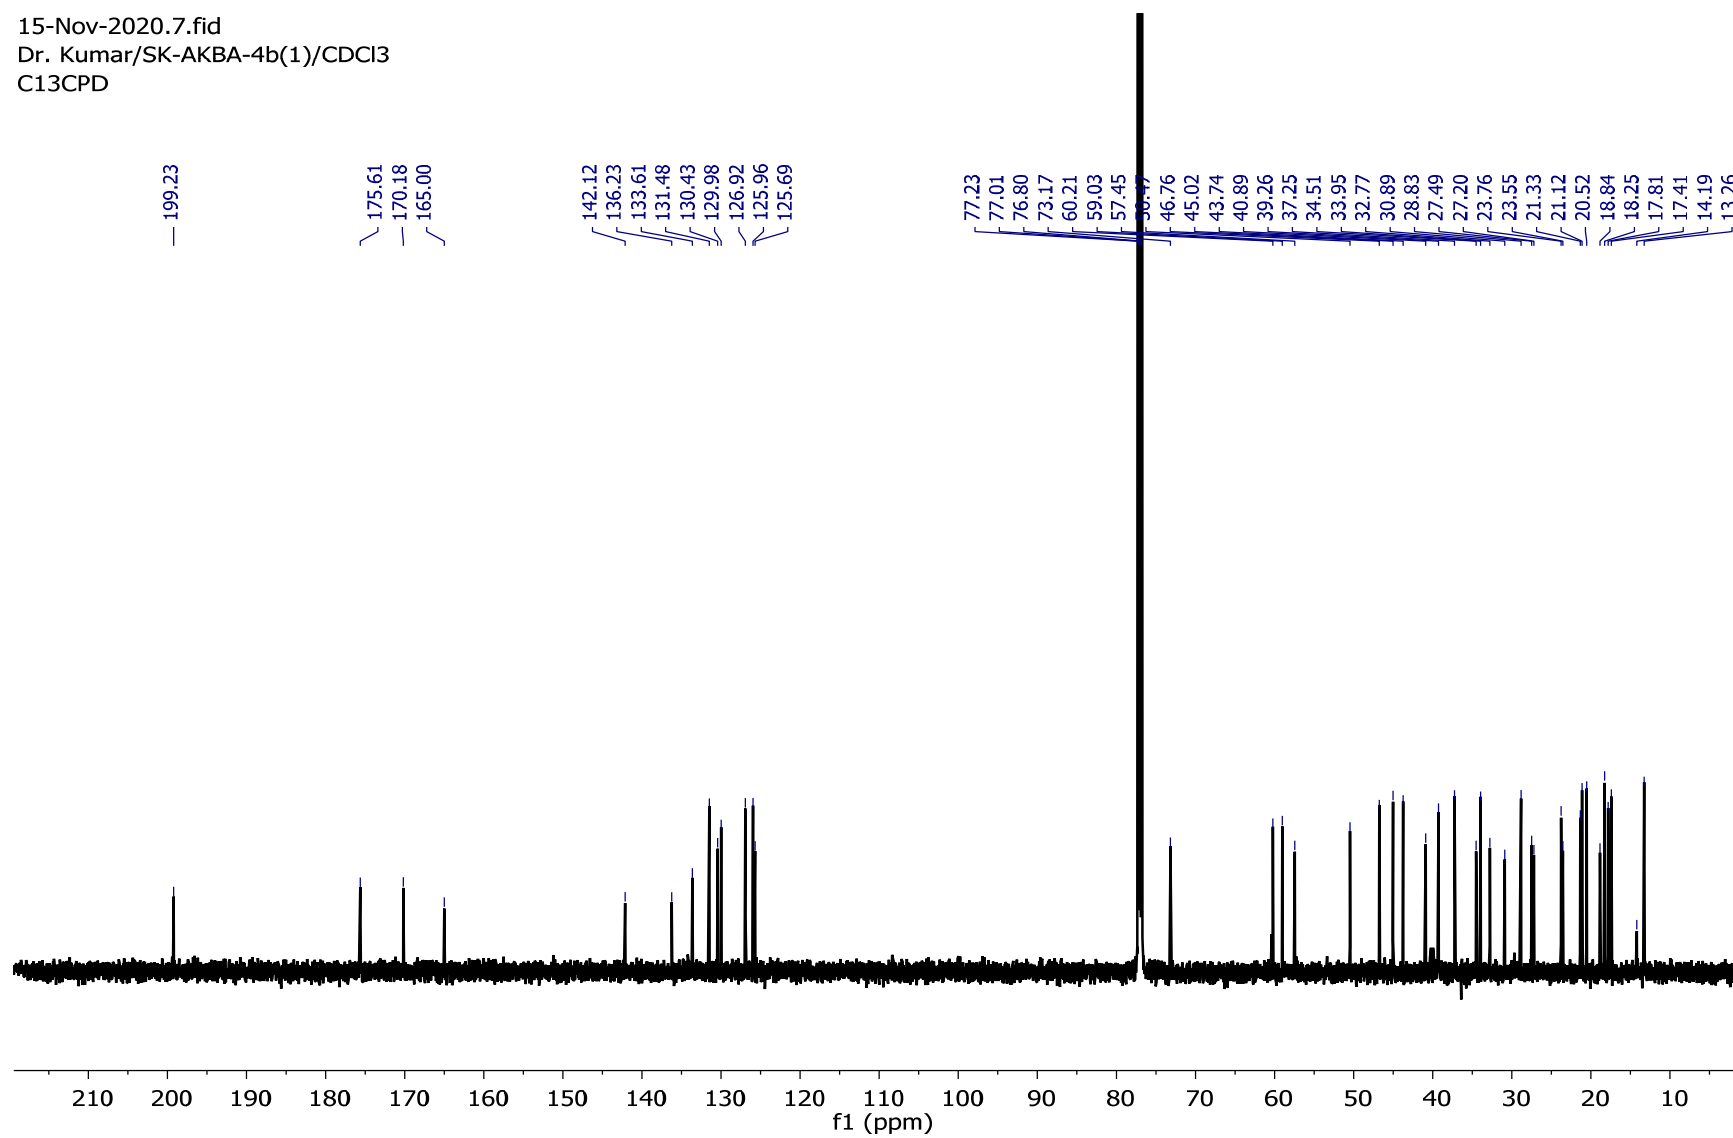

Figure S11: <sup>13</sup>C-NMR spectrum (150 MHz, CDCl<sub>3</sub>) of compound **6b**



|             |                          |                        |         |                 |                      |
|-------------|--------------------------|------------------------|---------|-----------------|----------------------|
| Sample Name | SK-AKBA-4B               | Position               | Vial 15 | Instrument Name | Instrument 1         |
| User Name   |                          | Inj Vol                | 2       | InjPosition     |                      |
| Sample Type | Sample                   | IRM Calibration Status | Success | Data Filename   | SK-AKBA-4B_POS_01.d  |
| ACQ Method  | POSITIVE ION METHOD MS.m | Comment                | SK      | Acquired Time   | 11-Nov-20 3:25:23 PM |

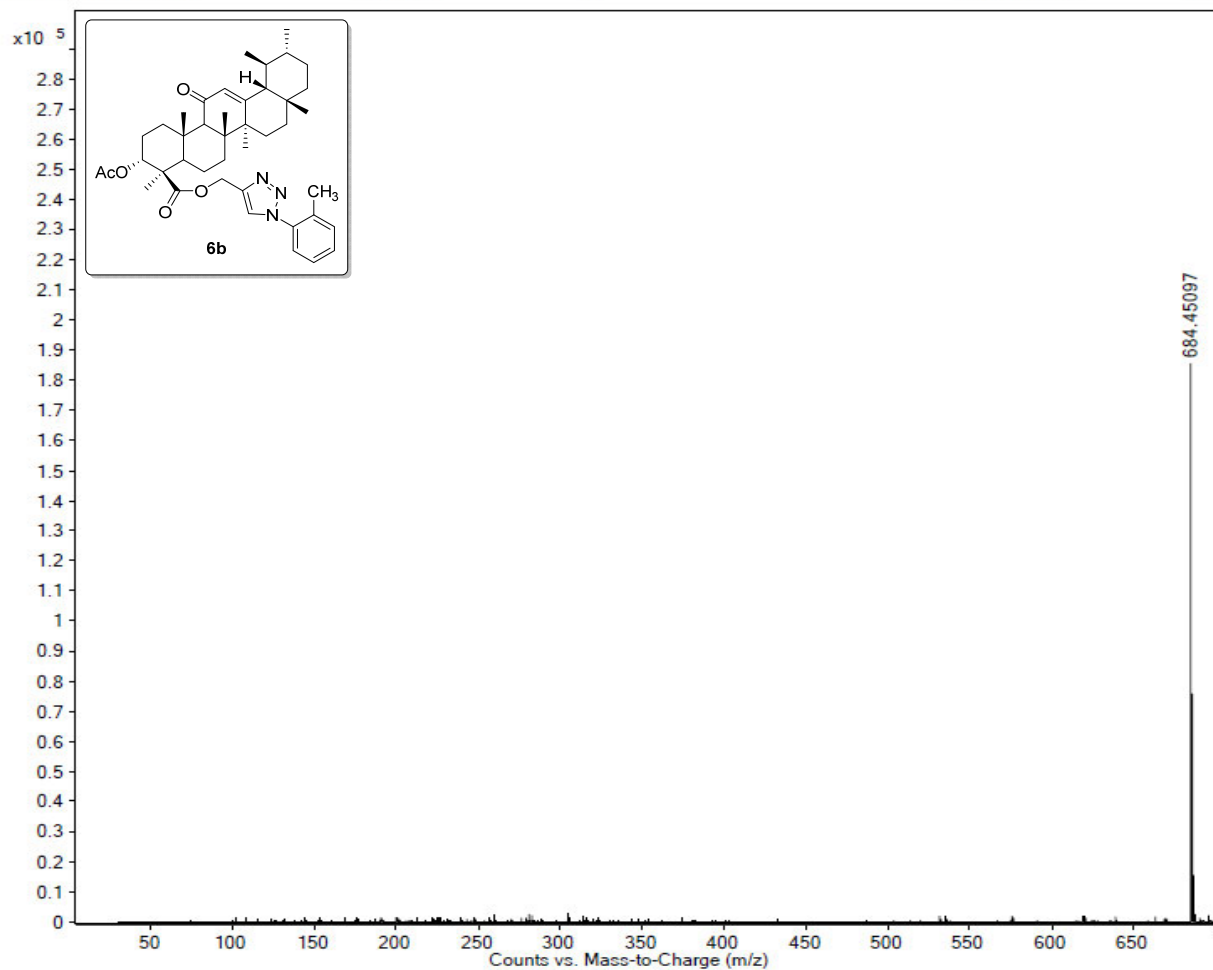

Figure S12: HRMS spectrum of compound **6b**

09-Dec-2020.1.fid  
Dr. Kumar/SK-AKBA-4C/CDCl<sub>3</sub>  
PROTON

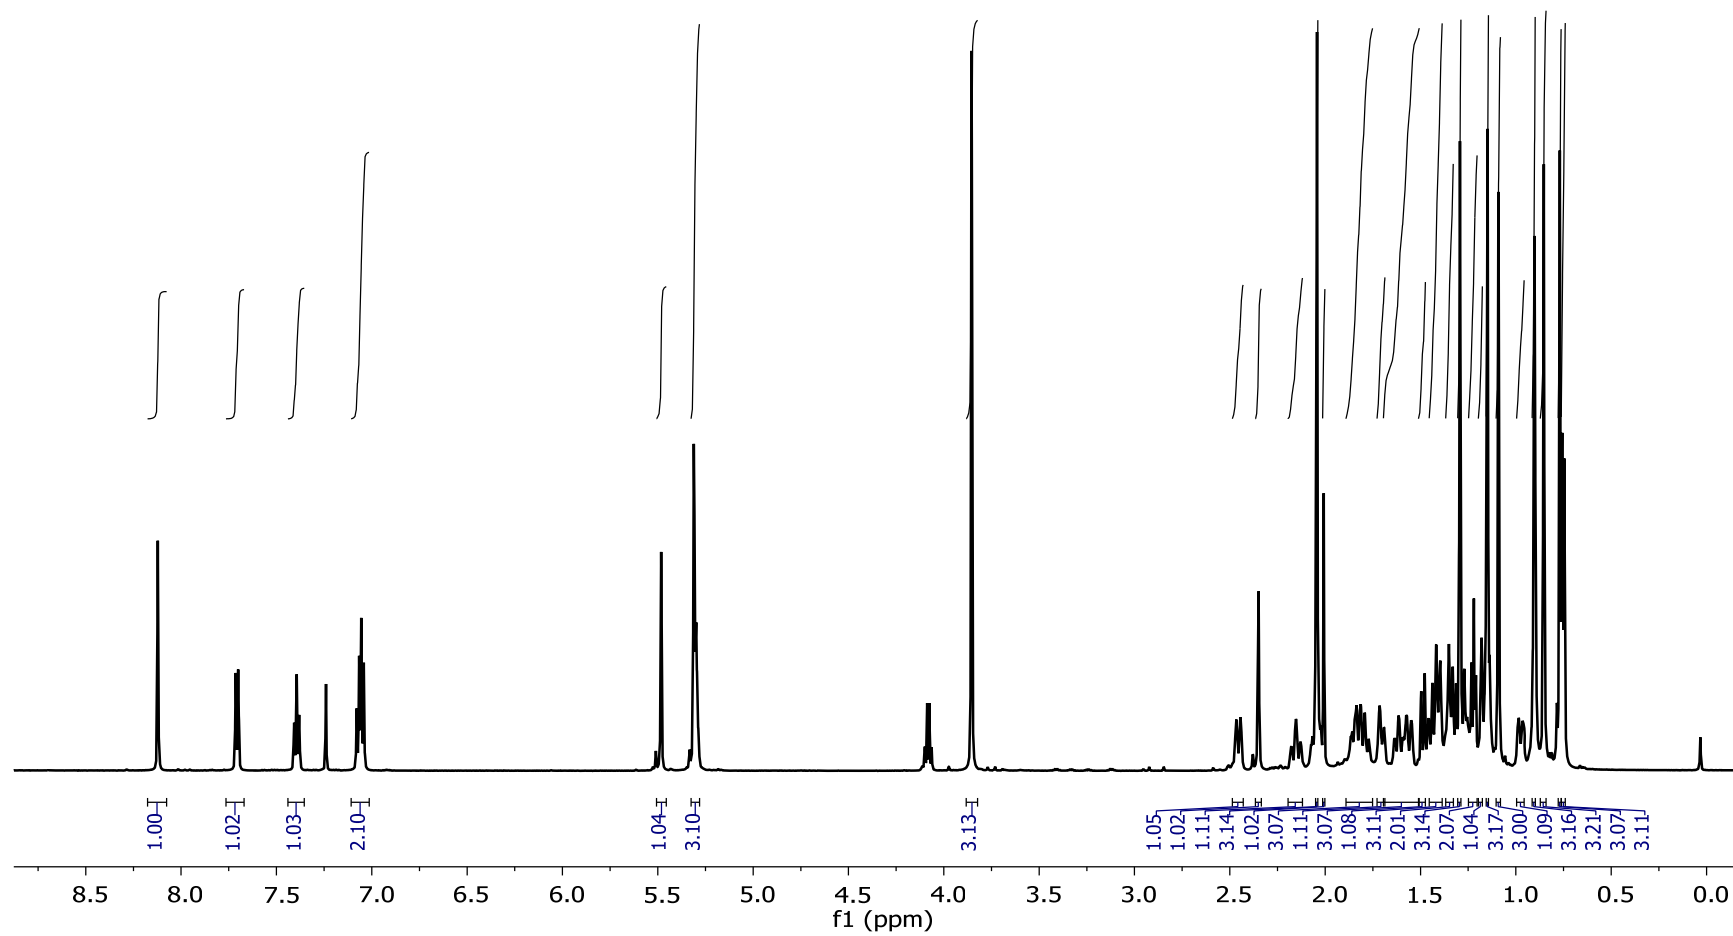

Figure S13: <sup>1</sup>H-NMR spectrum (600 MHz, CDCl<sub>3</sub>) of compound 6c

09-Dec-2020.7.fid  
Dr. Kumar/SK-AKBA-4C/CDCl<sub>3</sub>  
C13CPD

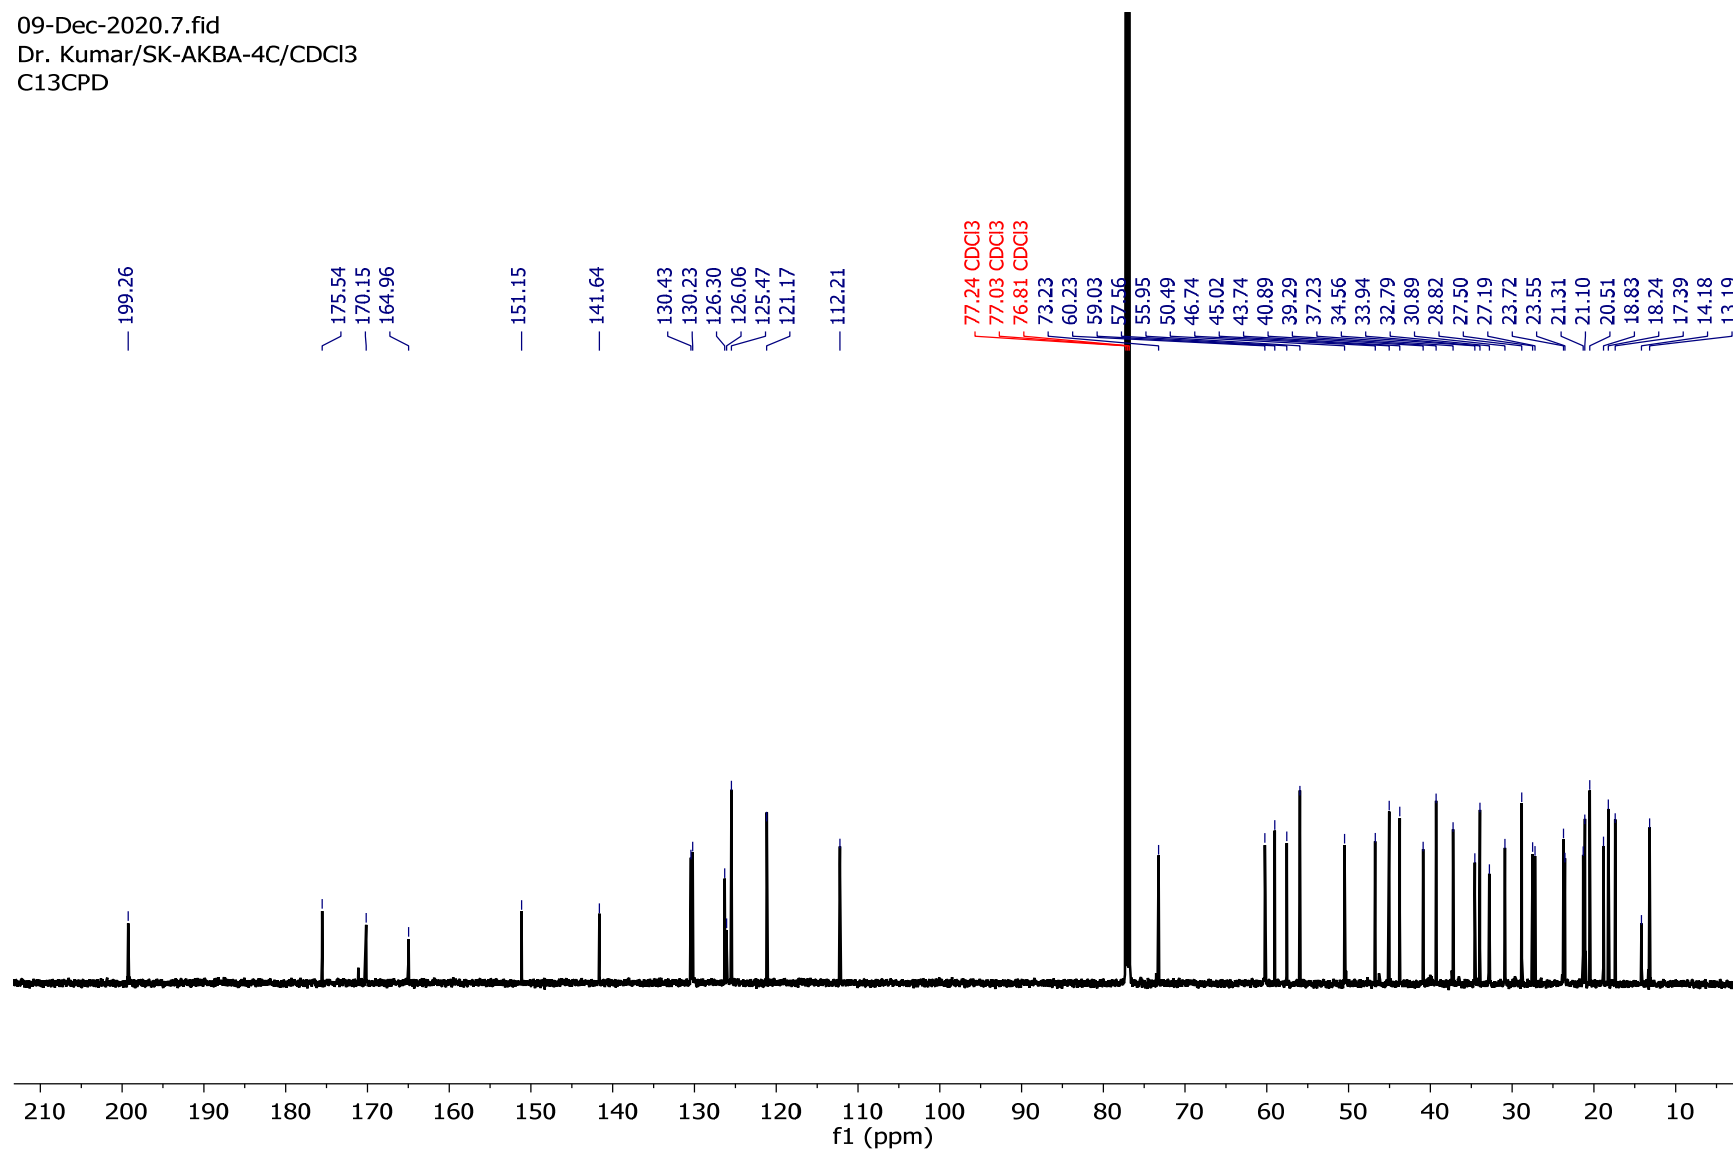

Figure S14: <sup>13</sup>C-NMR spectrum (150 MHz, CDCl<sub>3</sub>) of compound **6c**

|                    |                          |                               |         |                        |                      |
|--------------------|--------------------------|-------------------------------|---------|------------------------|----------------------|
| <b>Sample Name</b> | SK-AKBA-4C               | <b>Position</b>               | Vial 41 | <b>Instrument Name</b> | Instrument 1         |
| <b>User Name</b>   |                          | <b>Inj Vol</b>                | 2       | <b>InjPosition</b>     |                      |
| <b>Sample Type</b> | Sample                   | <b>IRM Calibration Status</b> | Success | <b>Data Filename</b>   | SK-AKBA-4C_POS_01.d  |
| <b>ACQ Method</b>  | POSITIVE ION METHOD MS.m | <b>Comment</b>                | SK      | <b>Acquired Time</b>   | 11-Nov-20 3:02:18 PM |

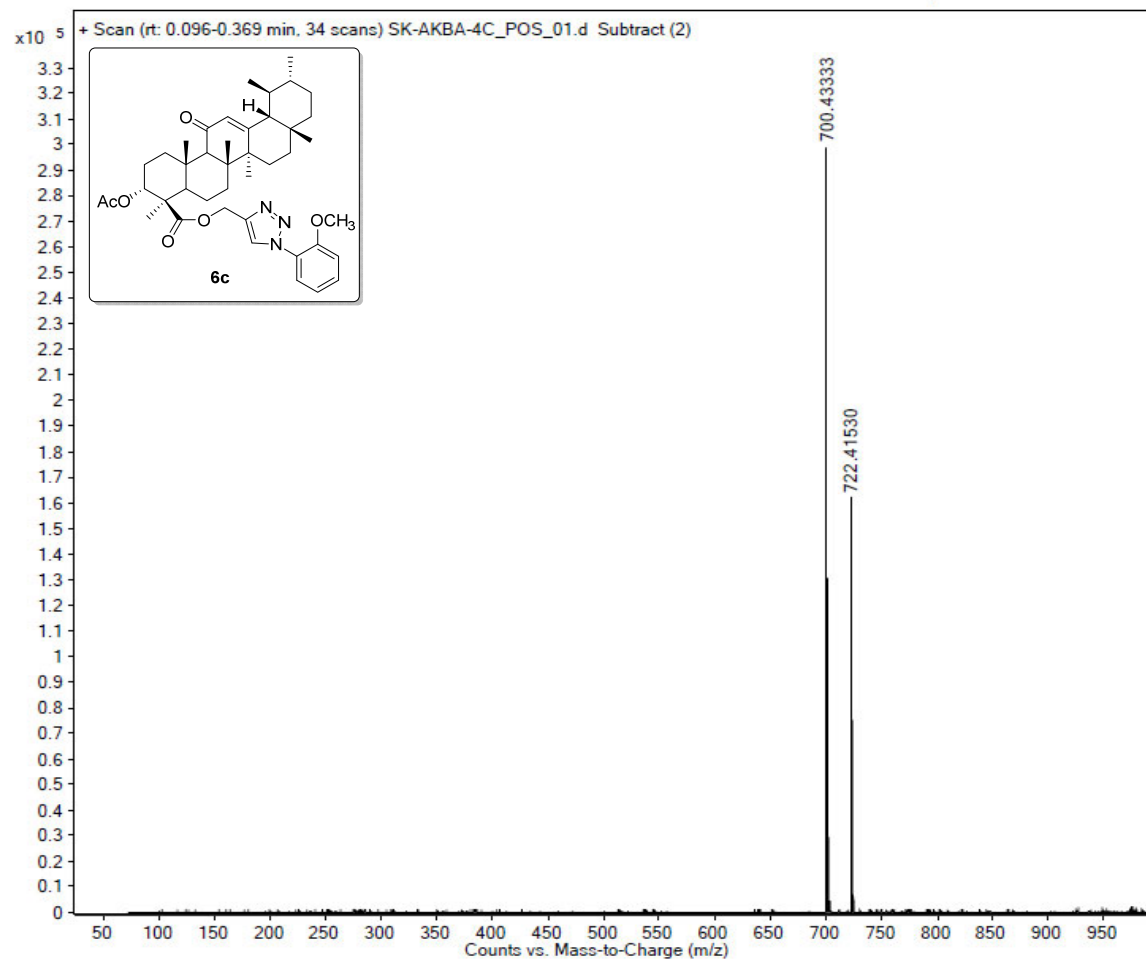

Figure S15: HRMS spectrum of compound 6c

15-Nov-2020 1 fid  
1H-NMR (600 MHz, CDCl<sub>3</sub>)  
Dr. Kumar/SK-AKBA-4D/CDCl<sub>3</sub>  
PROTON

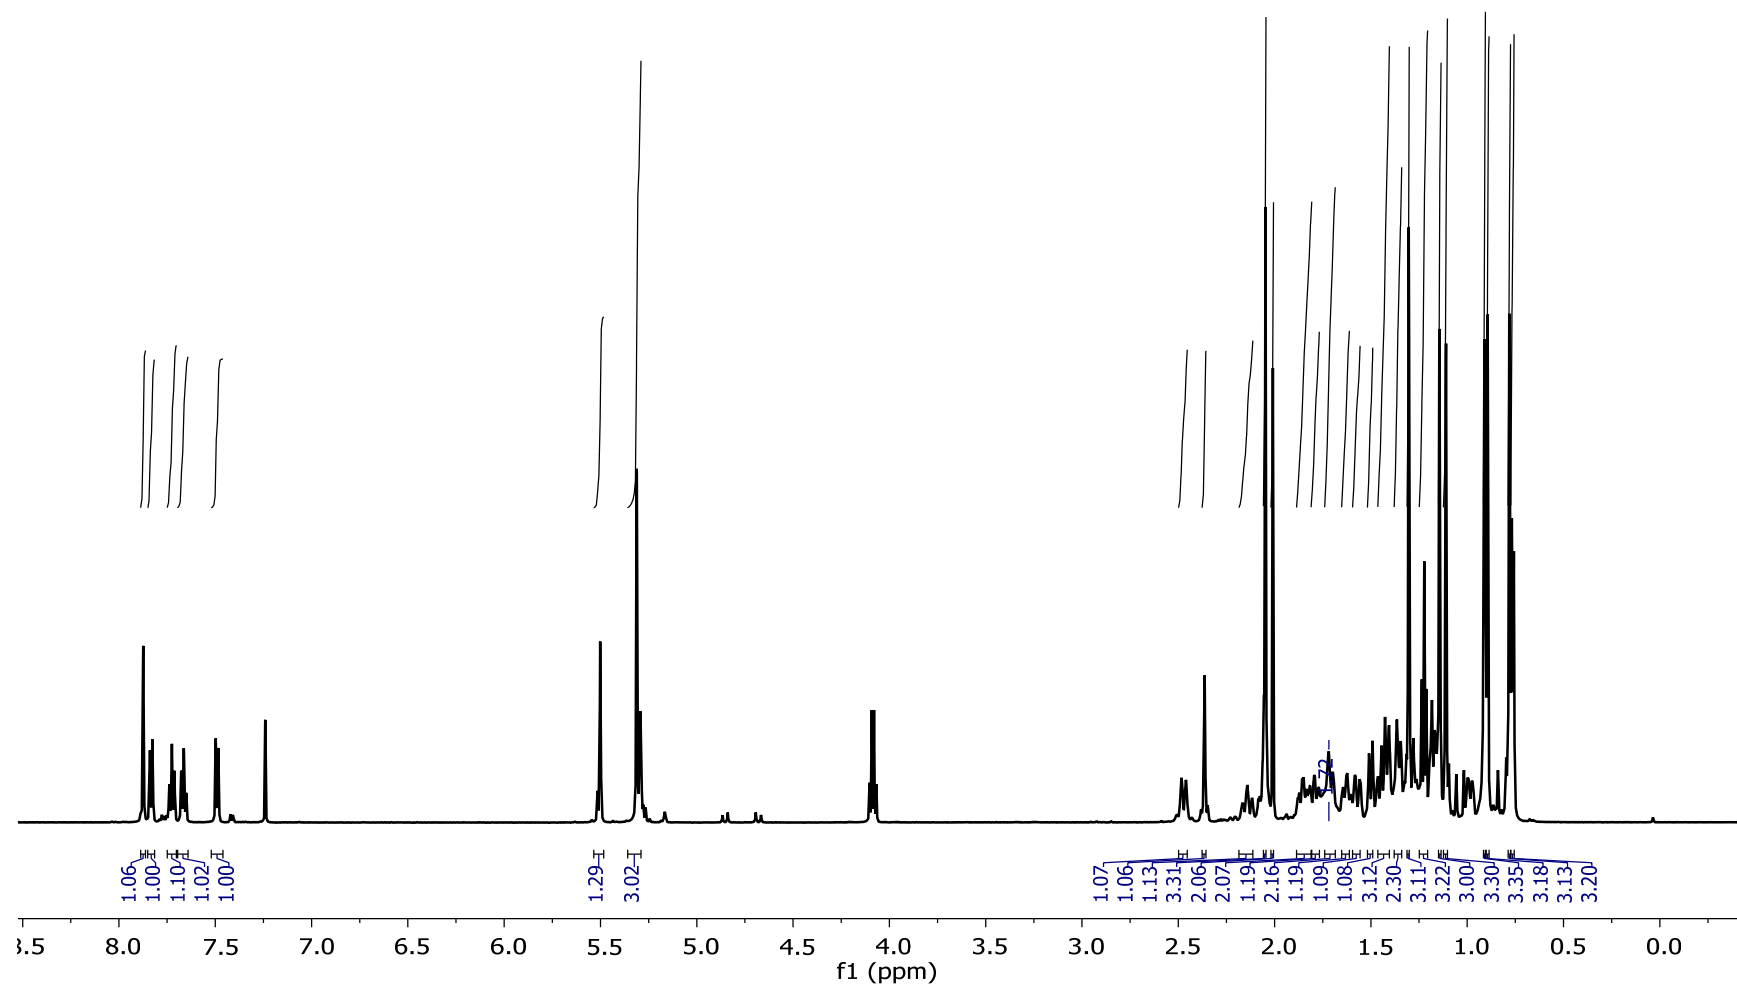

Figure S16: <sup>1</sup>H-NMR spectrum (600 MHz, CDCl<sub>3</sub>) of compound 6d

15-Nov-2020.2.fid  
Dr. Kumar/SK-AKBA-4D/CDCl<sub>3</sub>  
C13CPD

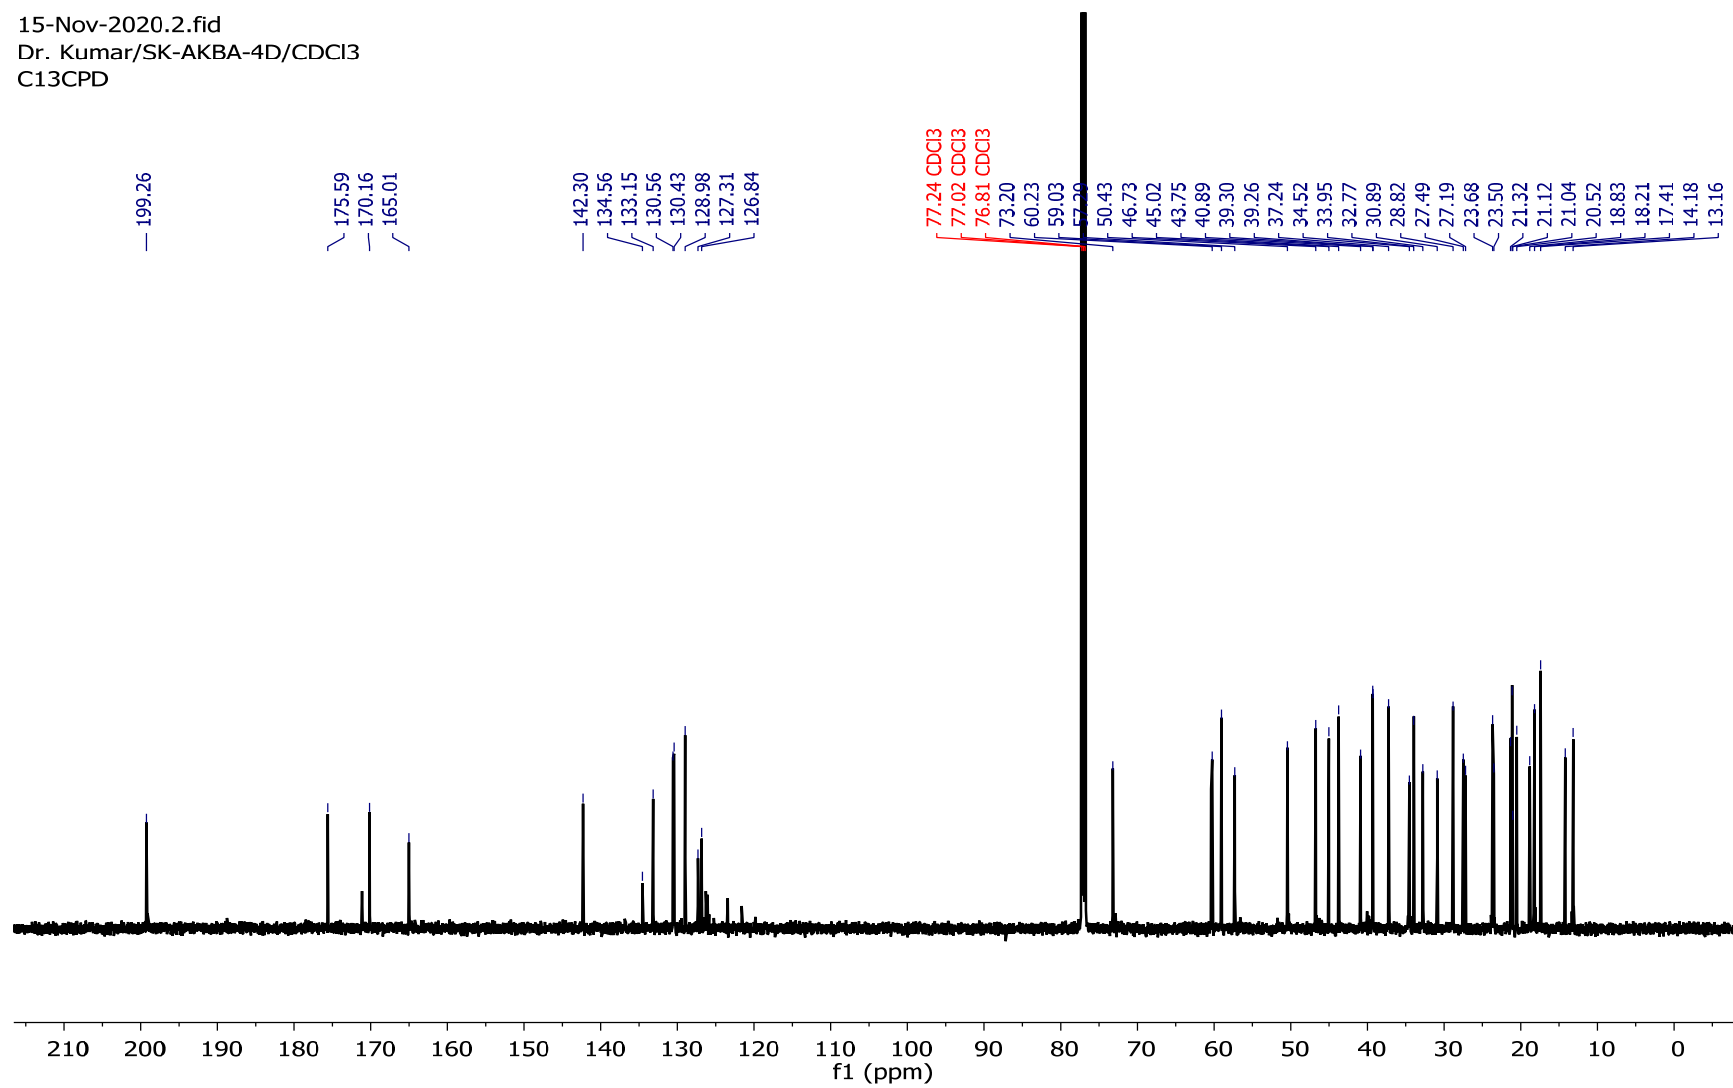

Figure S17: <sup>13</sup>C-NMR spectrum (150 MHz, CDCl<sub>3</sub>) of compound 6d

15-Nov-2020.5.fid  
Dr. Kumar/SK-AKBA-4D/CDCl<sub>3</sub>  
F19CPD

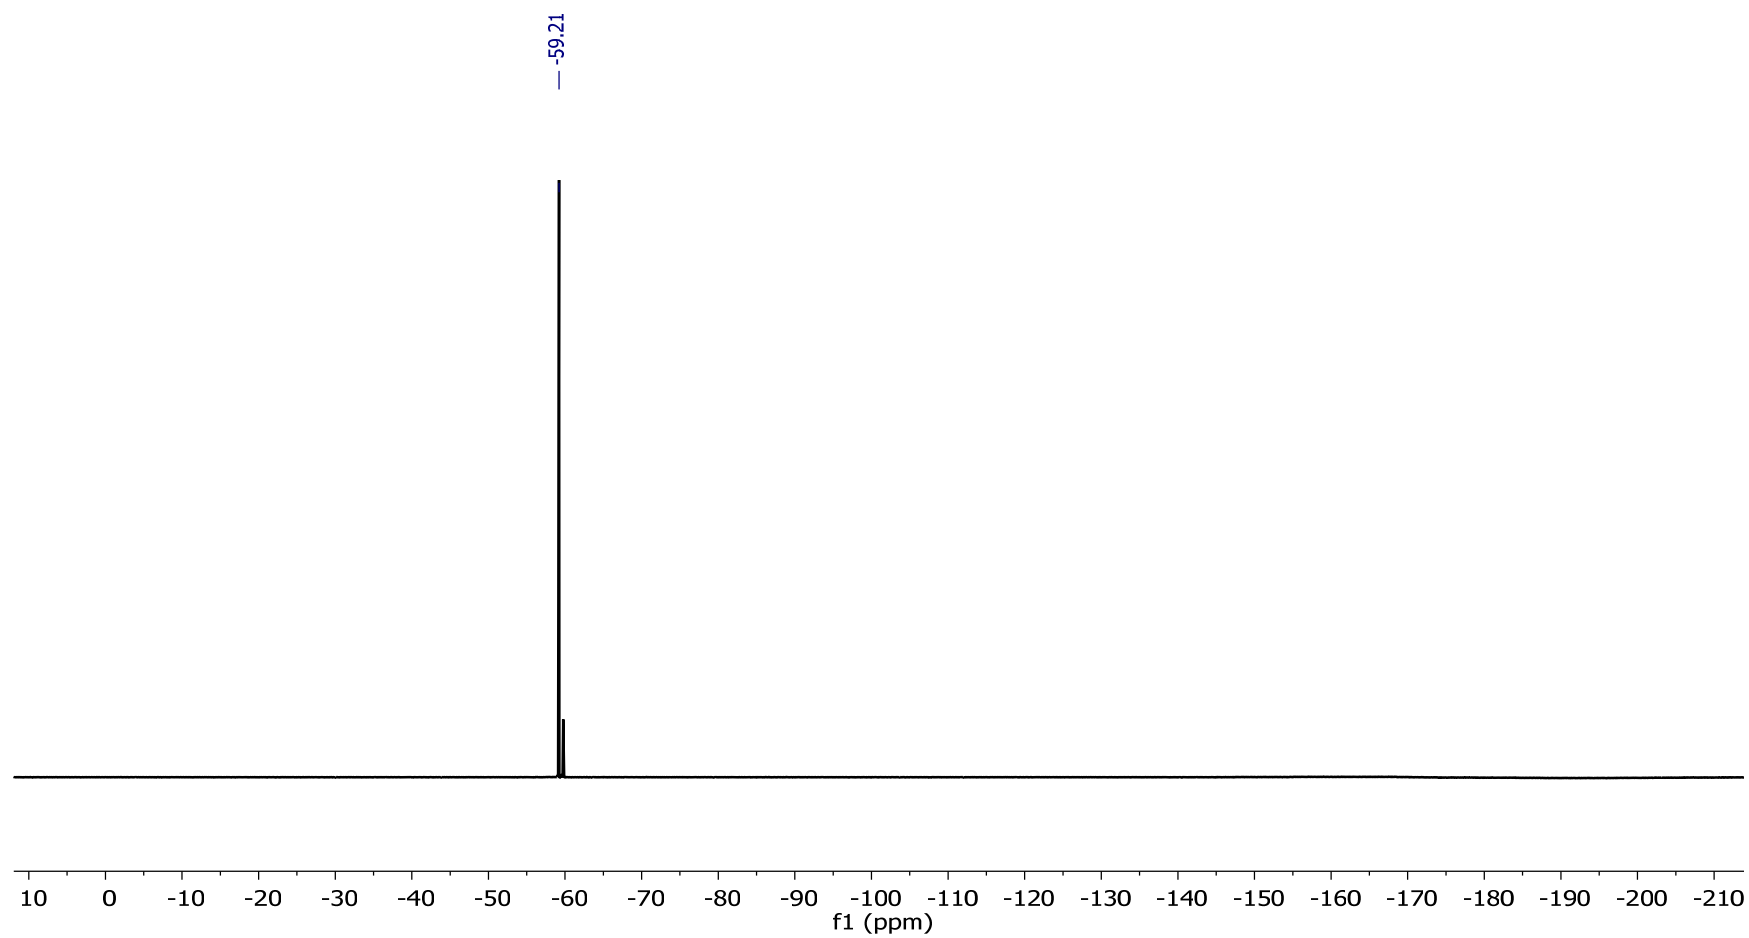

**Figure S18:** <sup>19</sup>F-NMR spectrum (564 MHz, CDCl<sub>3</sub>) of compound **6d**

|             |                          |                        |         |                 |                      |
|-------------|--------------------------|------------------------|---------|-----------------|----------------------|
| Sample Name | SK-AKBA-4D               | Position               | Vial 42 | Instrument Name | Instrument 1         |
| User Name   |                          | Inj Vol                | 2       | InjPosition     |                      |
| Sample Type | Sample                   | IRM Calibration Status | Success | Data Filename   | SK-AKBA-4D_POS_01.d  |
| ACQ Method  | POSITIVE ION METHOD MS.m | Comment                | SK      | Acquired Time   | 11-Nov-20 3:07:56 PM |

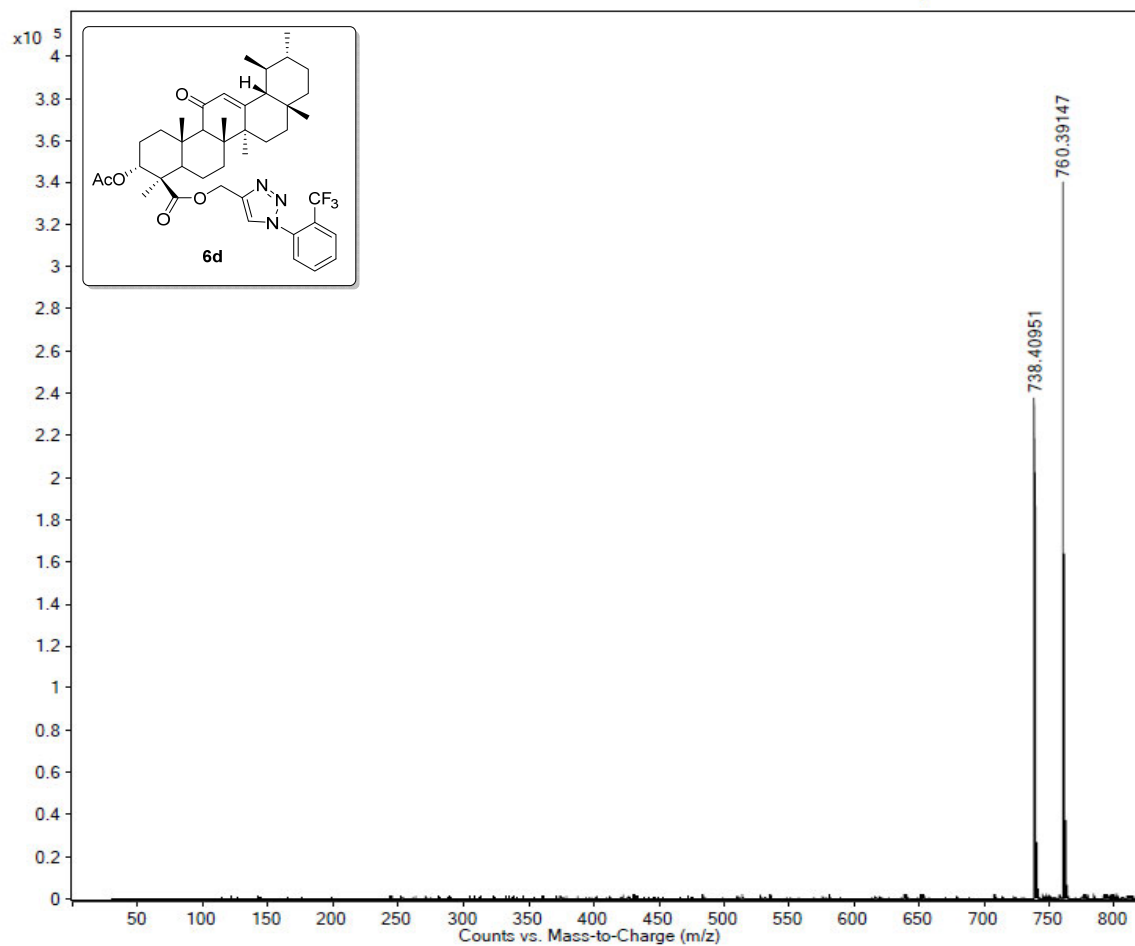

Figure S19: HRMS spectrum of compound **6d**



09-Dec-2020.2.fid  
Dr. Kumar/SK-AKBA-4E/CDCl<sub>3</sub>  
PROTON

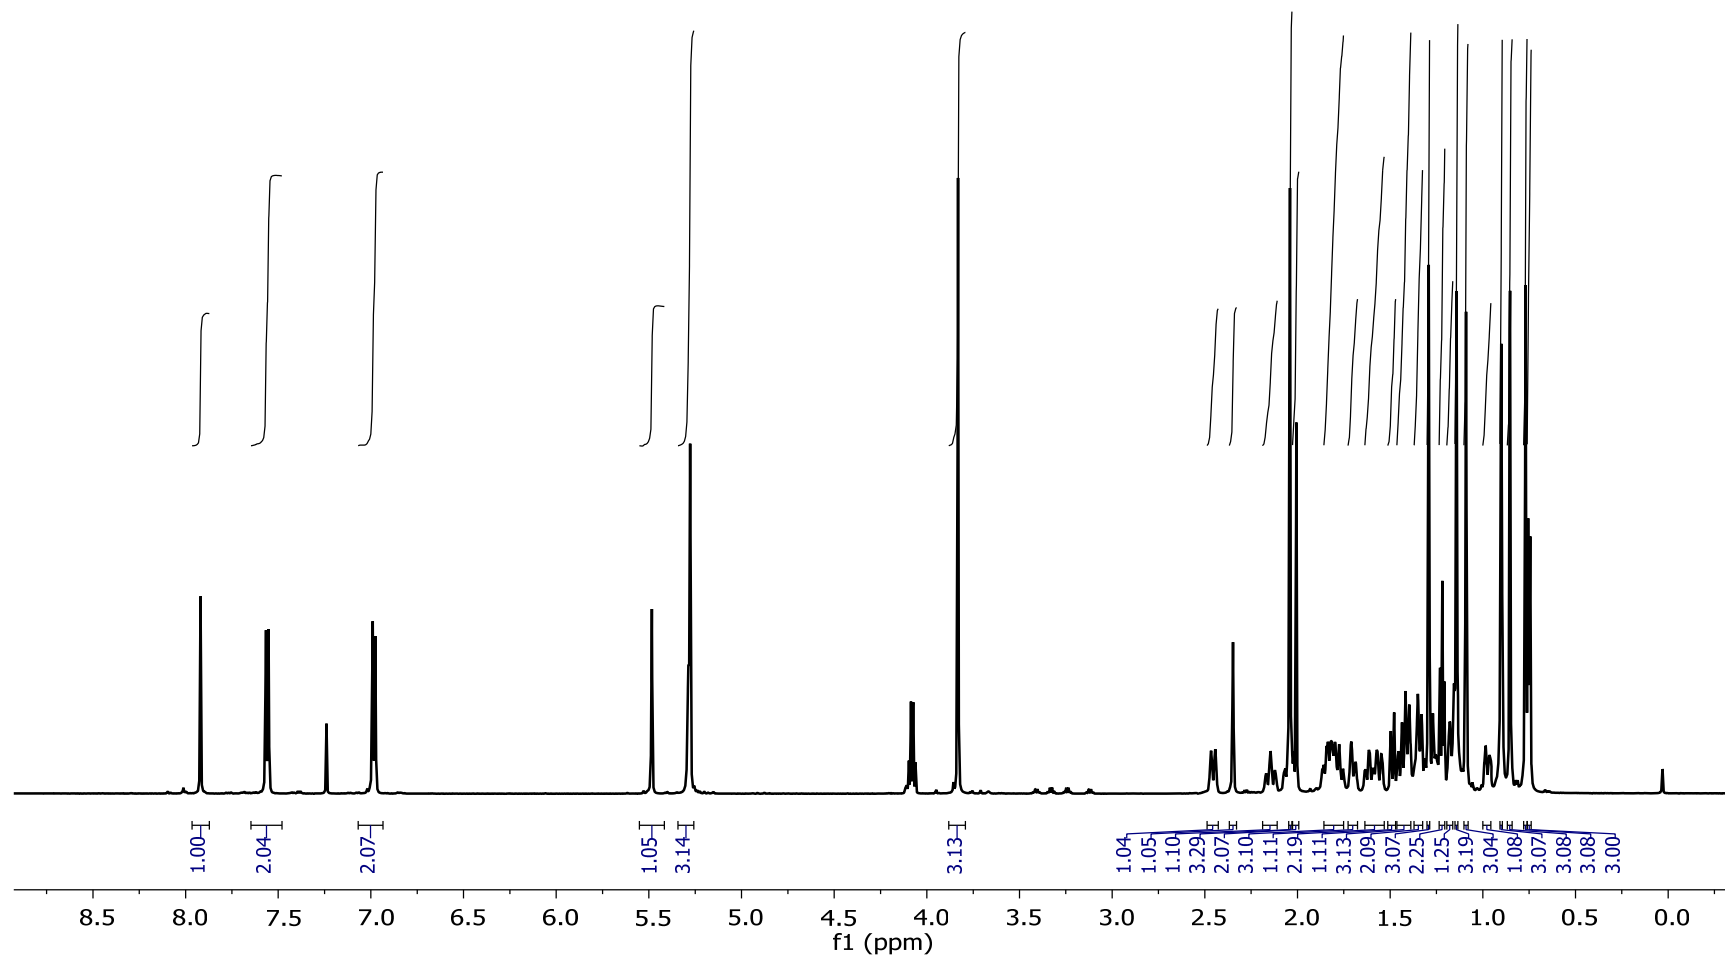

Figure S20: <sup>1</sup>H-NMR spectrum (600 MHz, CDCl<sub>3</sub>) of compound 6e

09-Dec-2020.10.fid  
Dr. Kumar/SK-AKBA-4E/CDCl<sub>3</sub>  
C13CPD

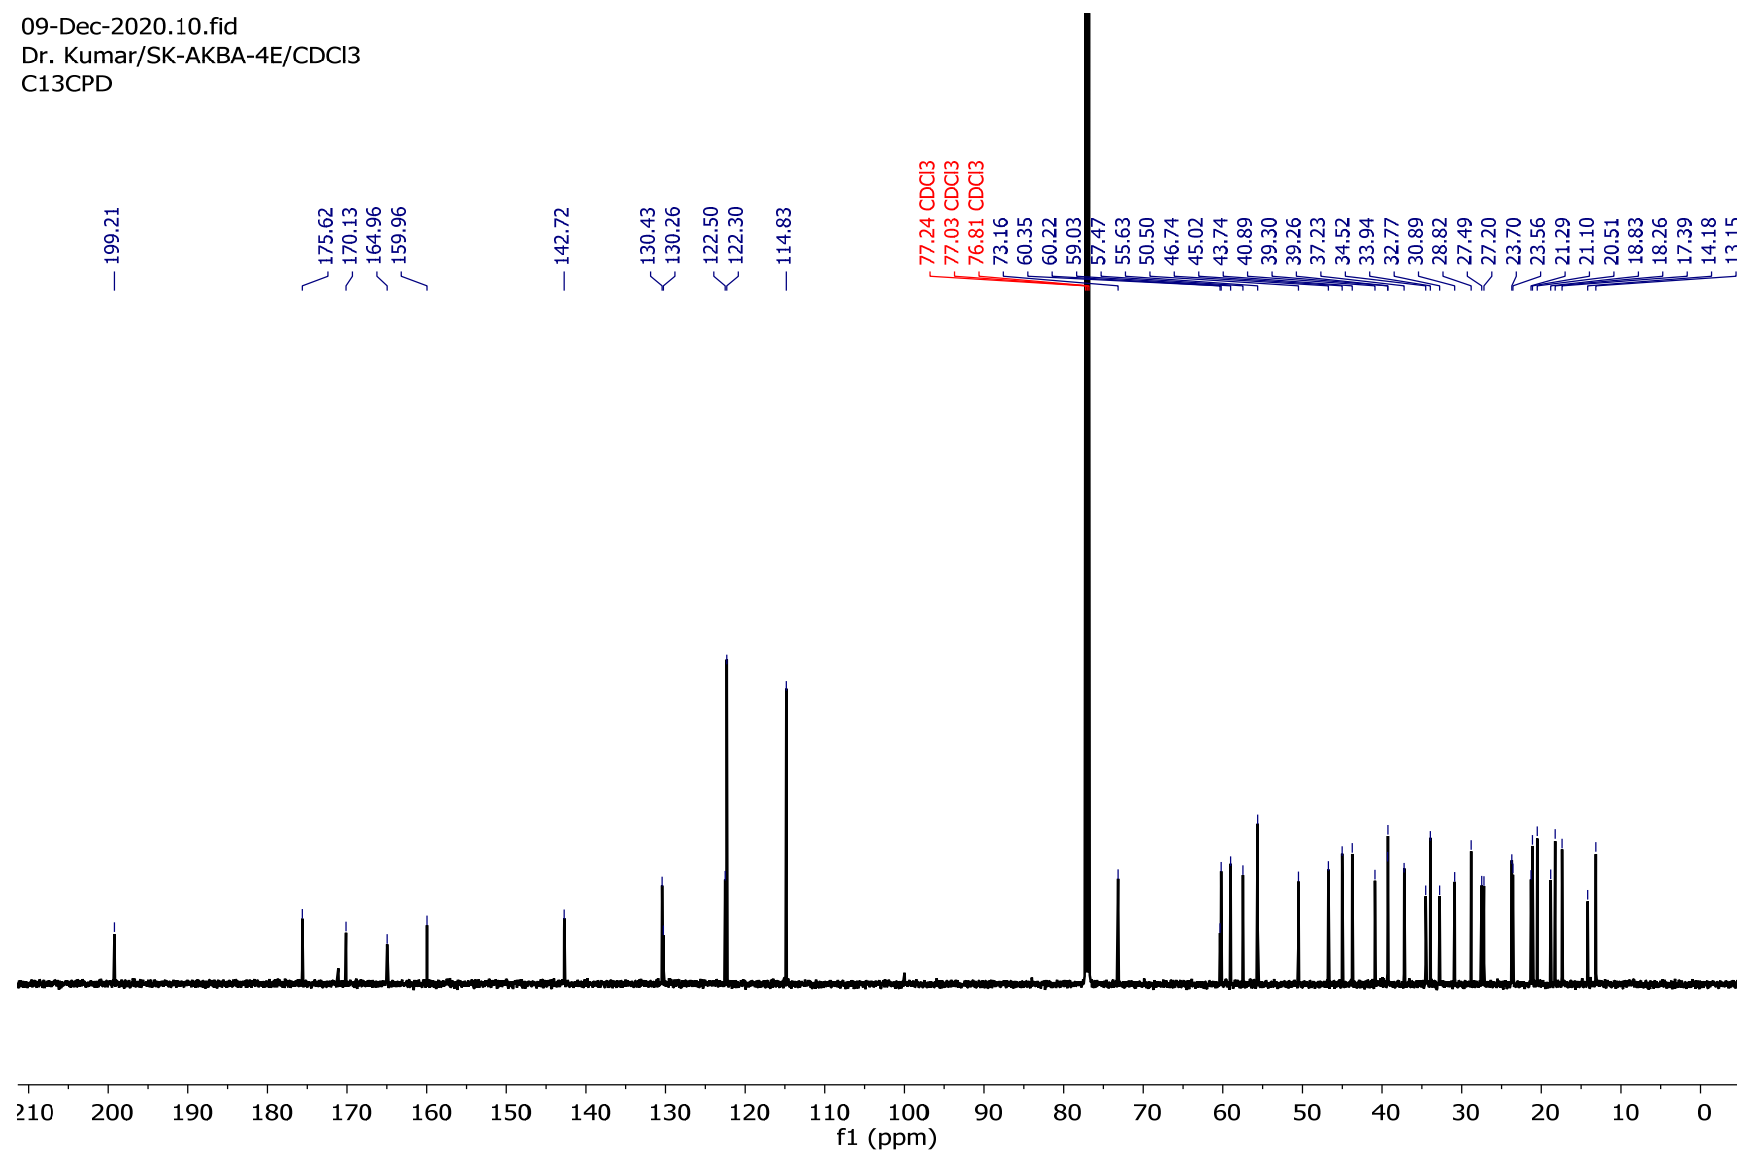

Figure S21: <sup>13</sup>C-NMR spectrum (150 MHz, CDCl<sub>3</sub>) of compound **6e**

|             |                          |                        |         |                 |                      |
|-------------|--------------------------|------------------------|---------|-----------------|----------------------|
| Sample Name | 4E                       | Position               | Vial 44 | Instrument Name | Instrument 1         |
| User Name   |                          | Inj Vol                | 2       | InjPosition     |                      |
| Sample Type | Sample                   | IRM Calibration Status | Success | Data Filename   | 4E_POS_01.d          |
| ACQ Method  | POSITIVE ION METHOD MS.m | Comment                | SK      | Acquired Time   | 20-Nov-20 6:38:30 PM |

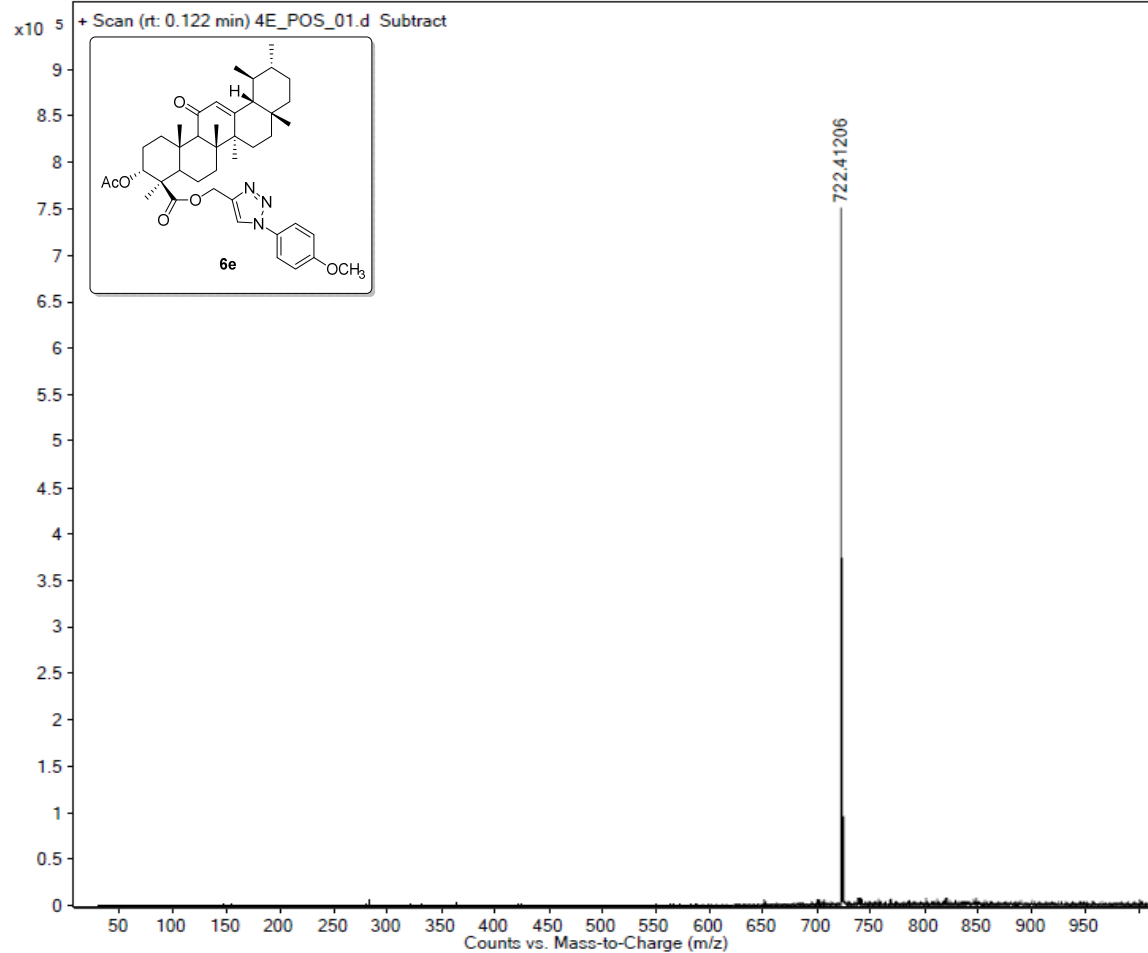

Figure S22: HRMS spectrum of compound **6e**

09-Dec-2020.3.fid  
Dr. Kumar/SK-AKBA-4F/CDCl<sub>3</sub>  
PROTON

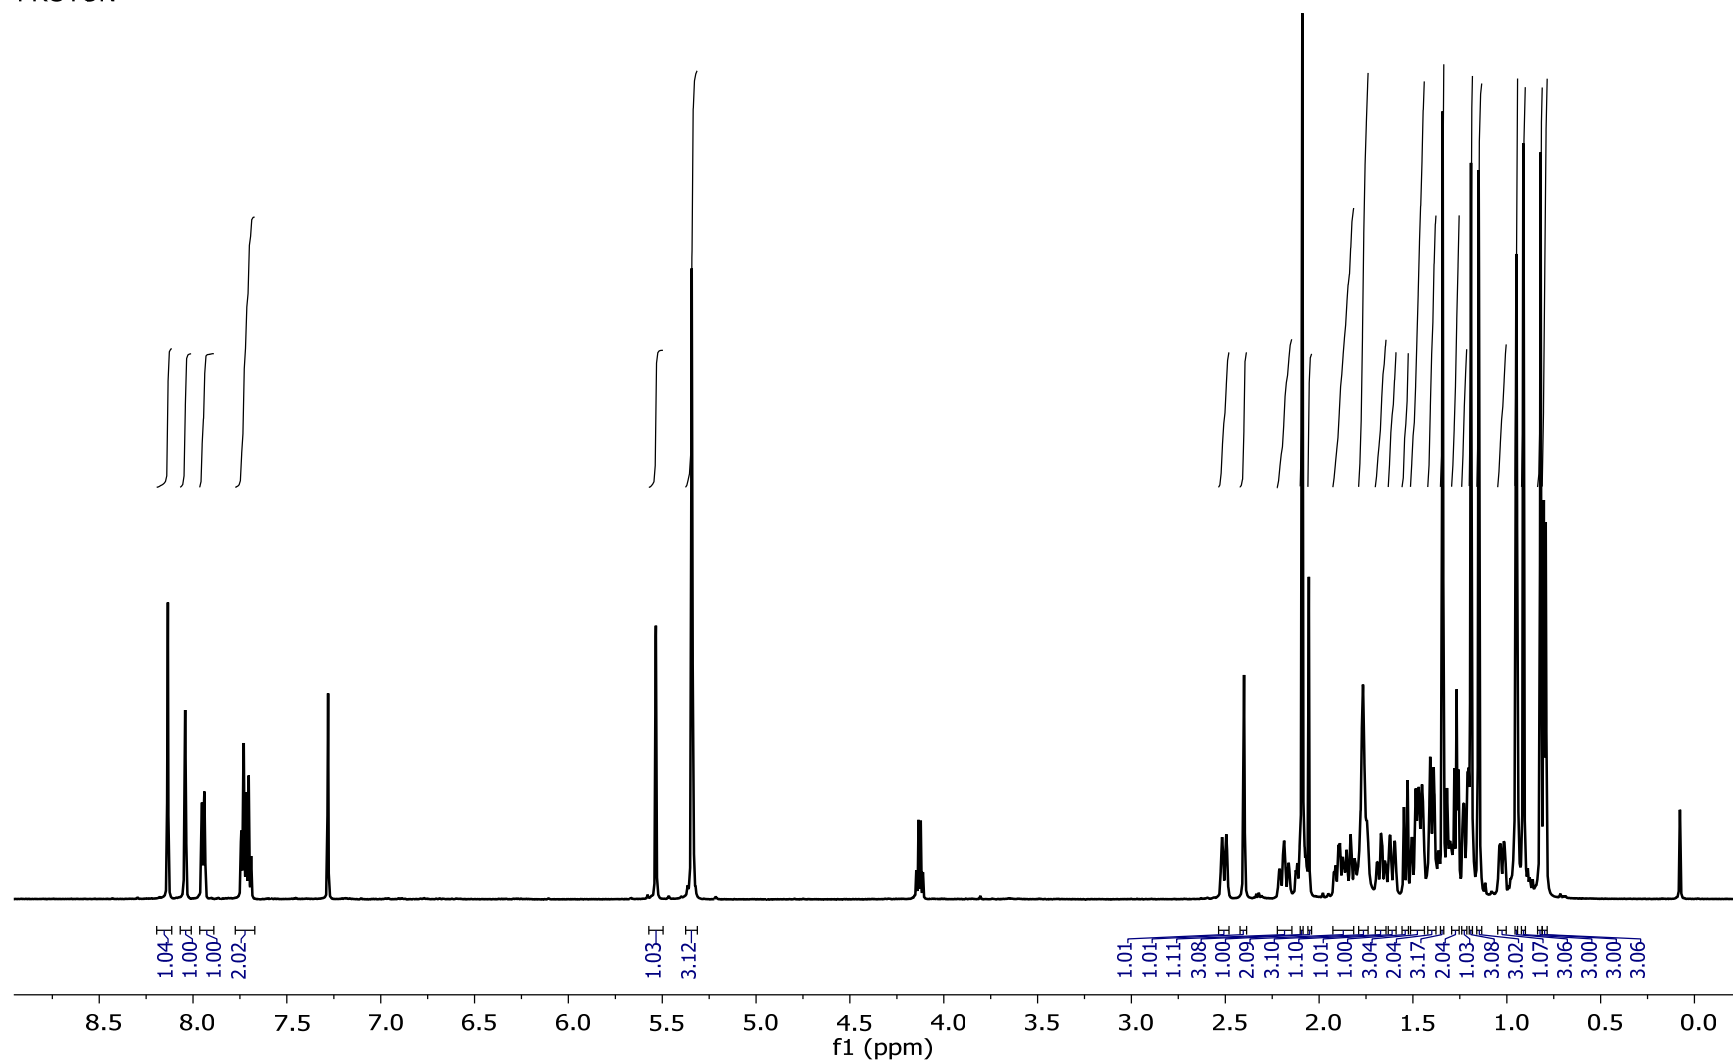

Figure S23: <sup>1</sup>H-NMR spectrum (600 MHz, CDCl<sub>3</sub>) of compound 6f

09-Dec-2020.13.fid  
Dr. Kumar/SK-AKBA-4F/CDCl<sub>3</sub>  
C13CPD

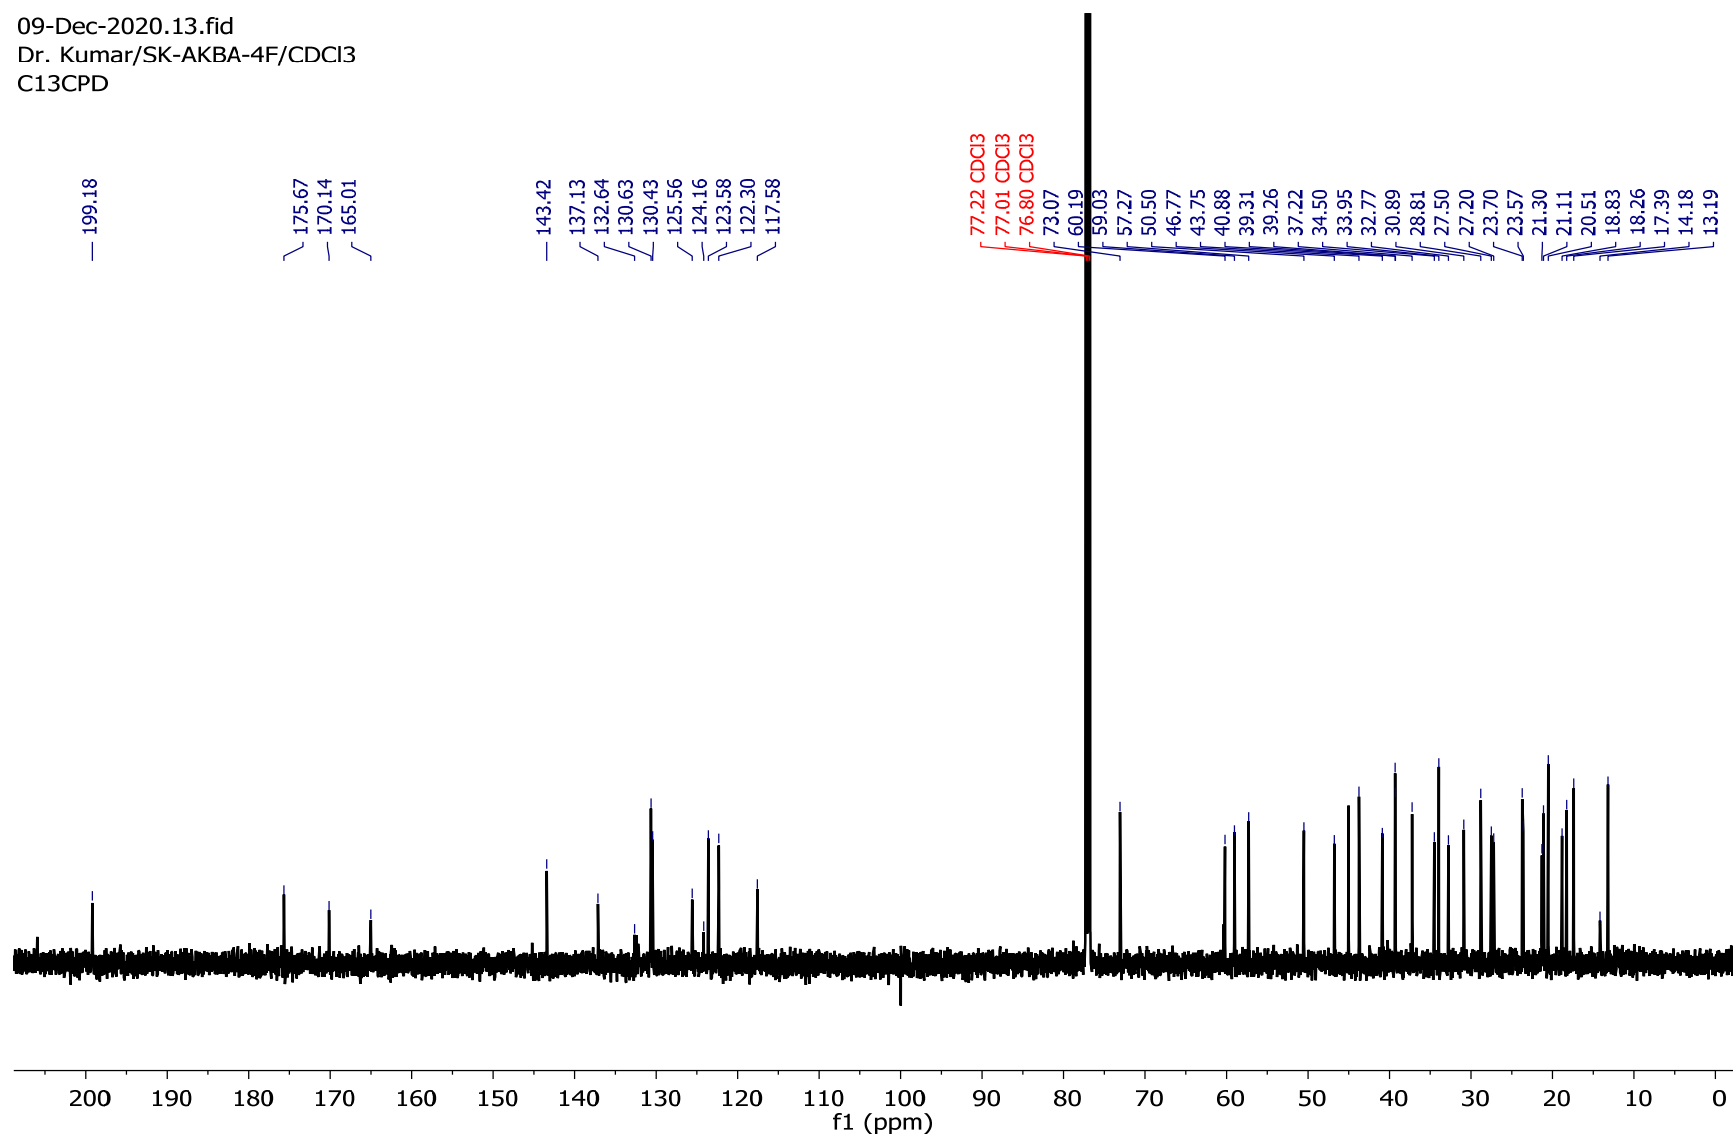

Figure S24: <sup>13</sup>C-NMR spectrum (150 MHz, CDCl<sub>3</sub>) of compound 6f

09-Dec-2020.25.fid  
Dr. Kumar/SK-AKBA-4F/CDCl<sub>3</sub>  
F19CPD

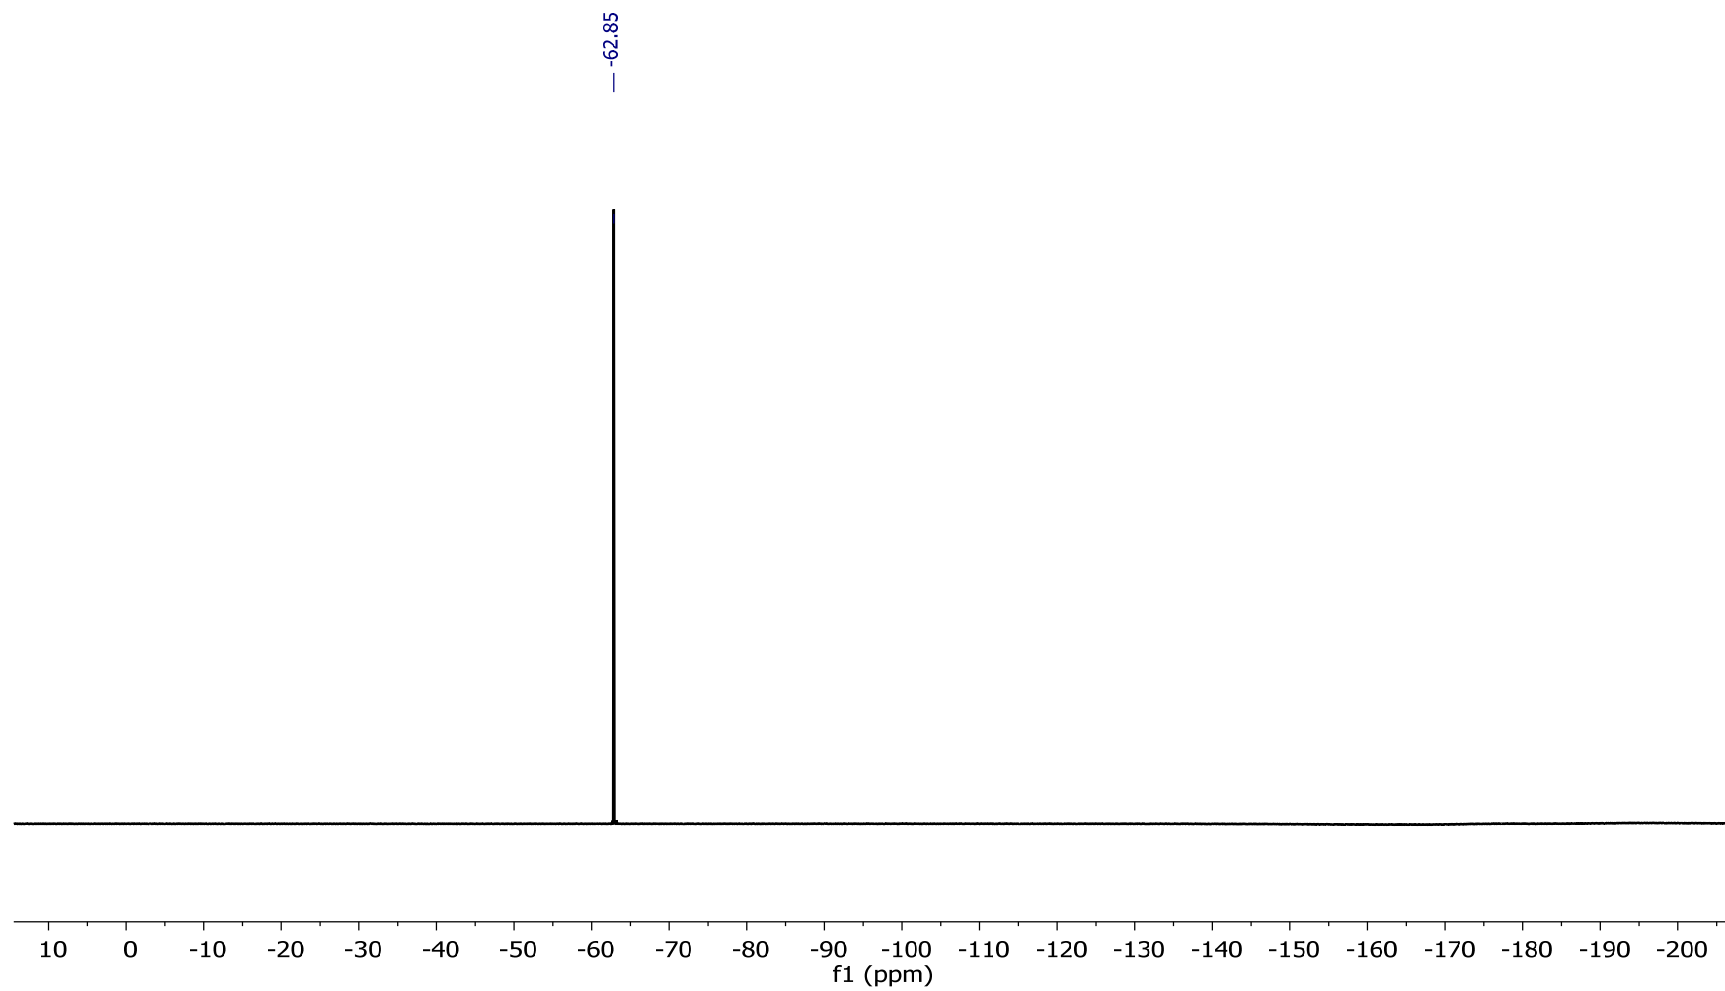

Figure S25: <sup>19</sup>F-NMR spectrum (564 MHz, CDCl<sub>3</sub>) of compound **6f**

|             |                          |                        |         |                 |                      |
|-------------|--------------------------|------------------------|---------|-----------------|----------------------|
| Sample Name | 4F                       | Position               | Vial 45 | Instrument Name | Instrument 1         |
| User Name   |                          | Inj Vol                | 2       | InjPosition     |                      |
| Sample Type | Sample                   | IRM Calibration Status | Success | Data Filename   | 4F_POS_01.d          |
| ACQ Method  | POSITIVE ION METHOD MS.m | Comment                | SK      | Acquired Time   | 20-Nov-20 6:44:00 PM |

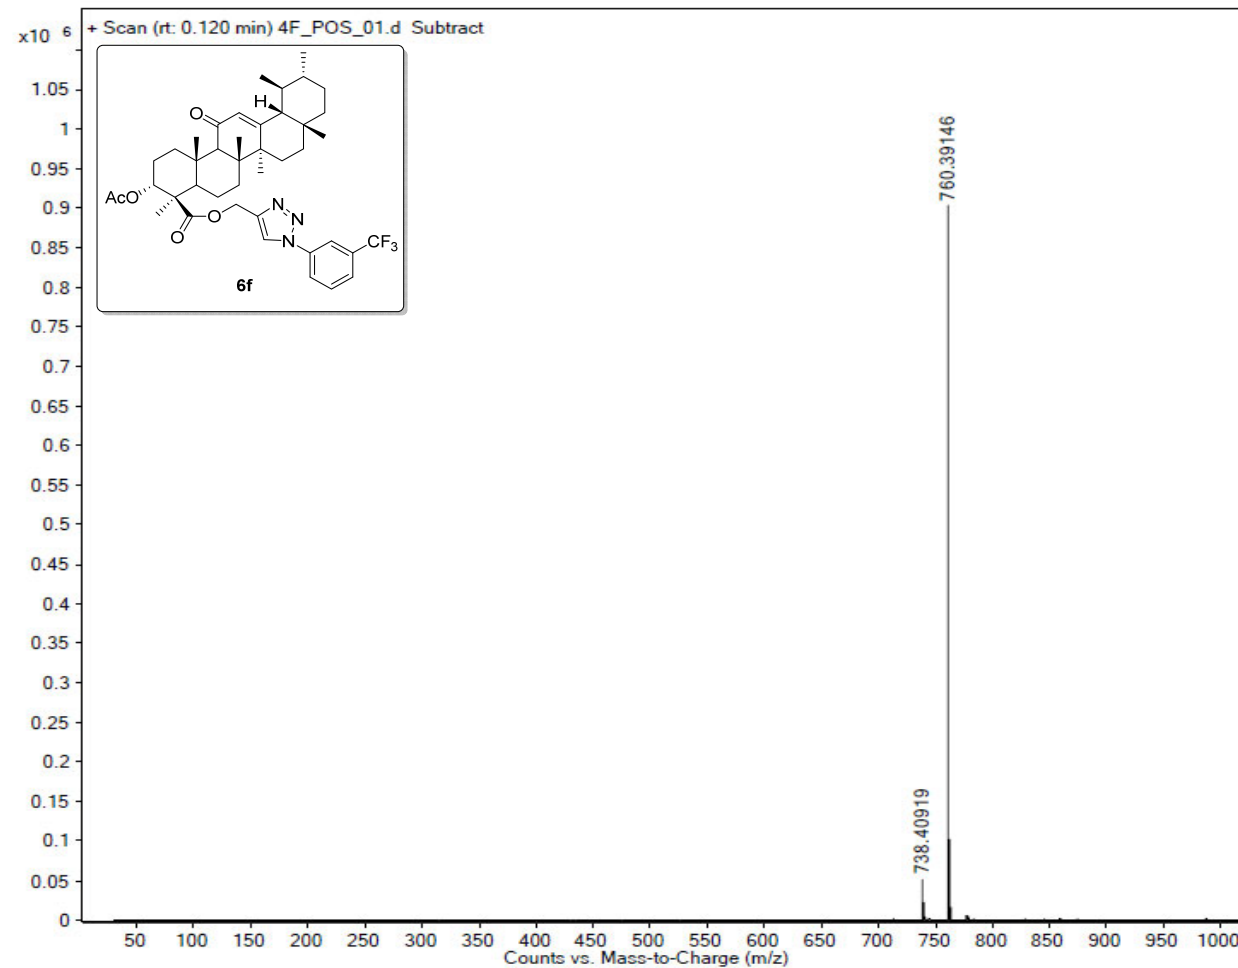

Figure S26: HRMS spectrum of compound **6f**

09-Dec-2020.4.fid  
Dr. Kumar/SK-AKBA-4G/CDCl<sub>3</sub>  
PROTON

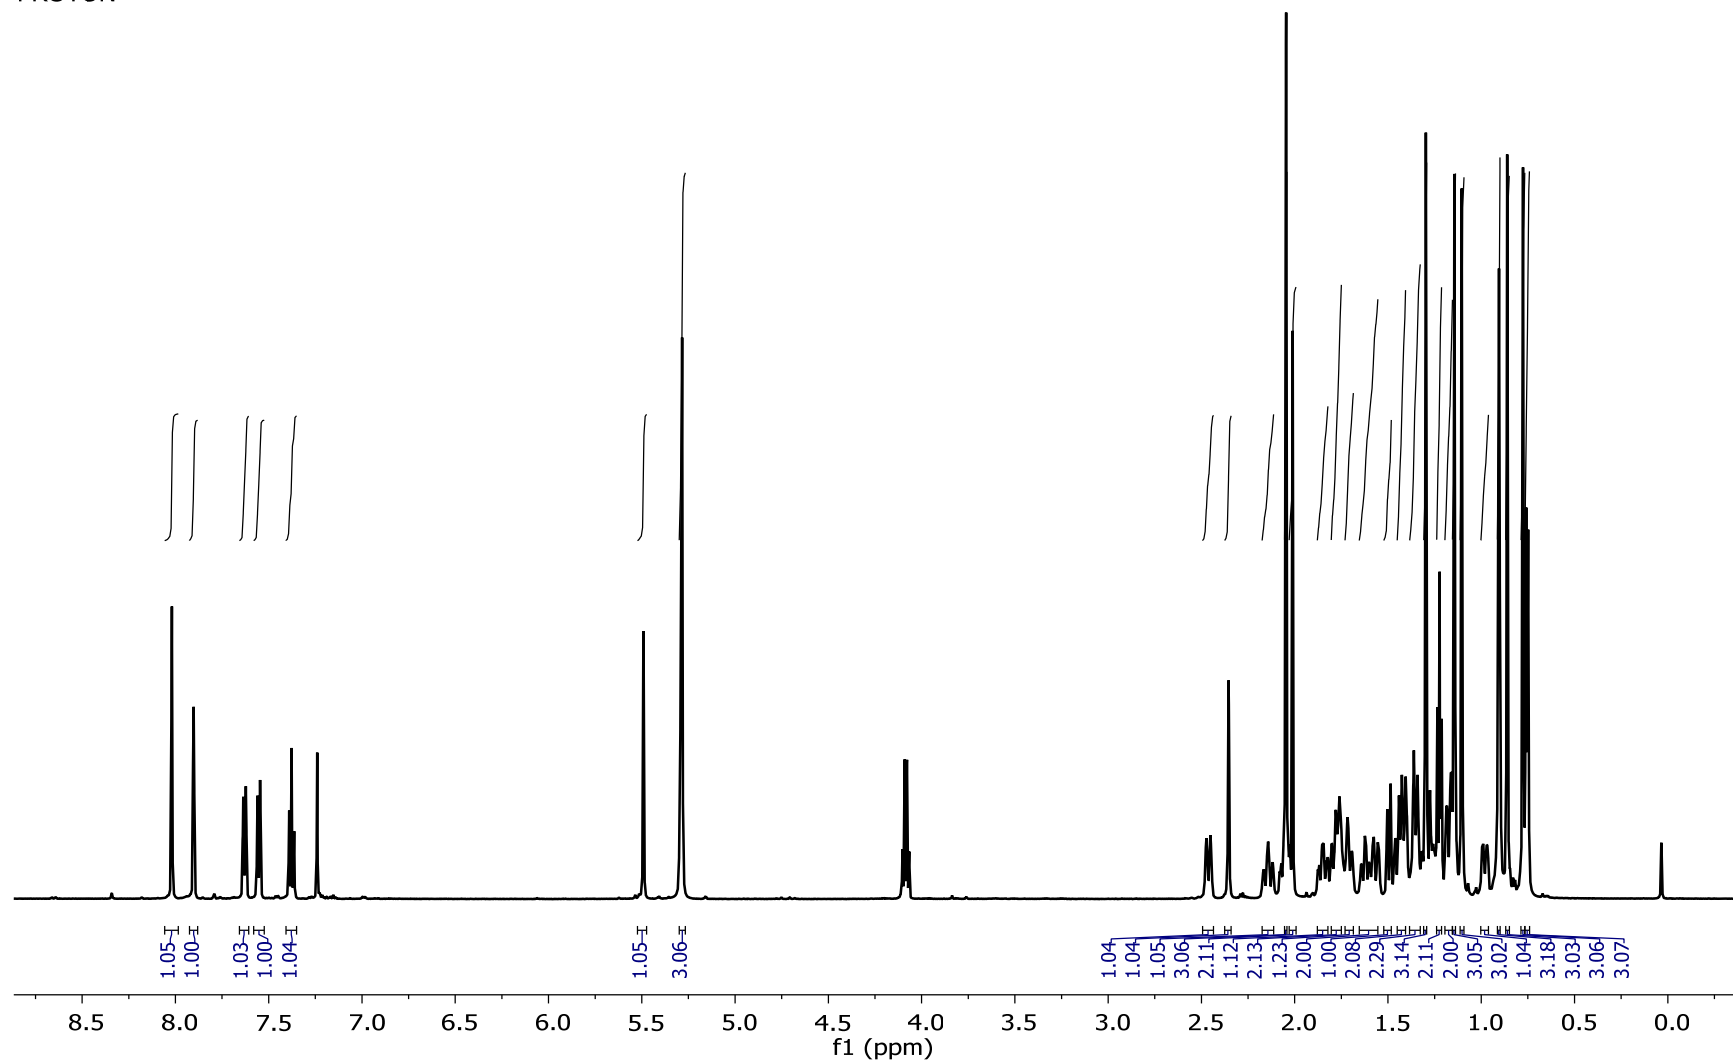

Figure S27: <sup>1</sup>H-NMR spectrum (600 MHz, CDCl<sub>3</sub>) of compound 6g



09-Dec-2020.16.fid  
Dr. Kumar/SK-AKBA-4G/CDCl<sub>3</sub>  
C13CPD

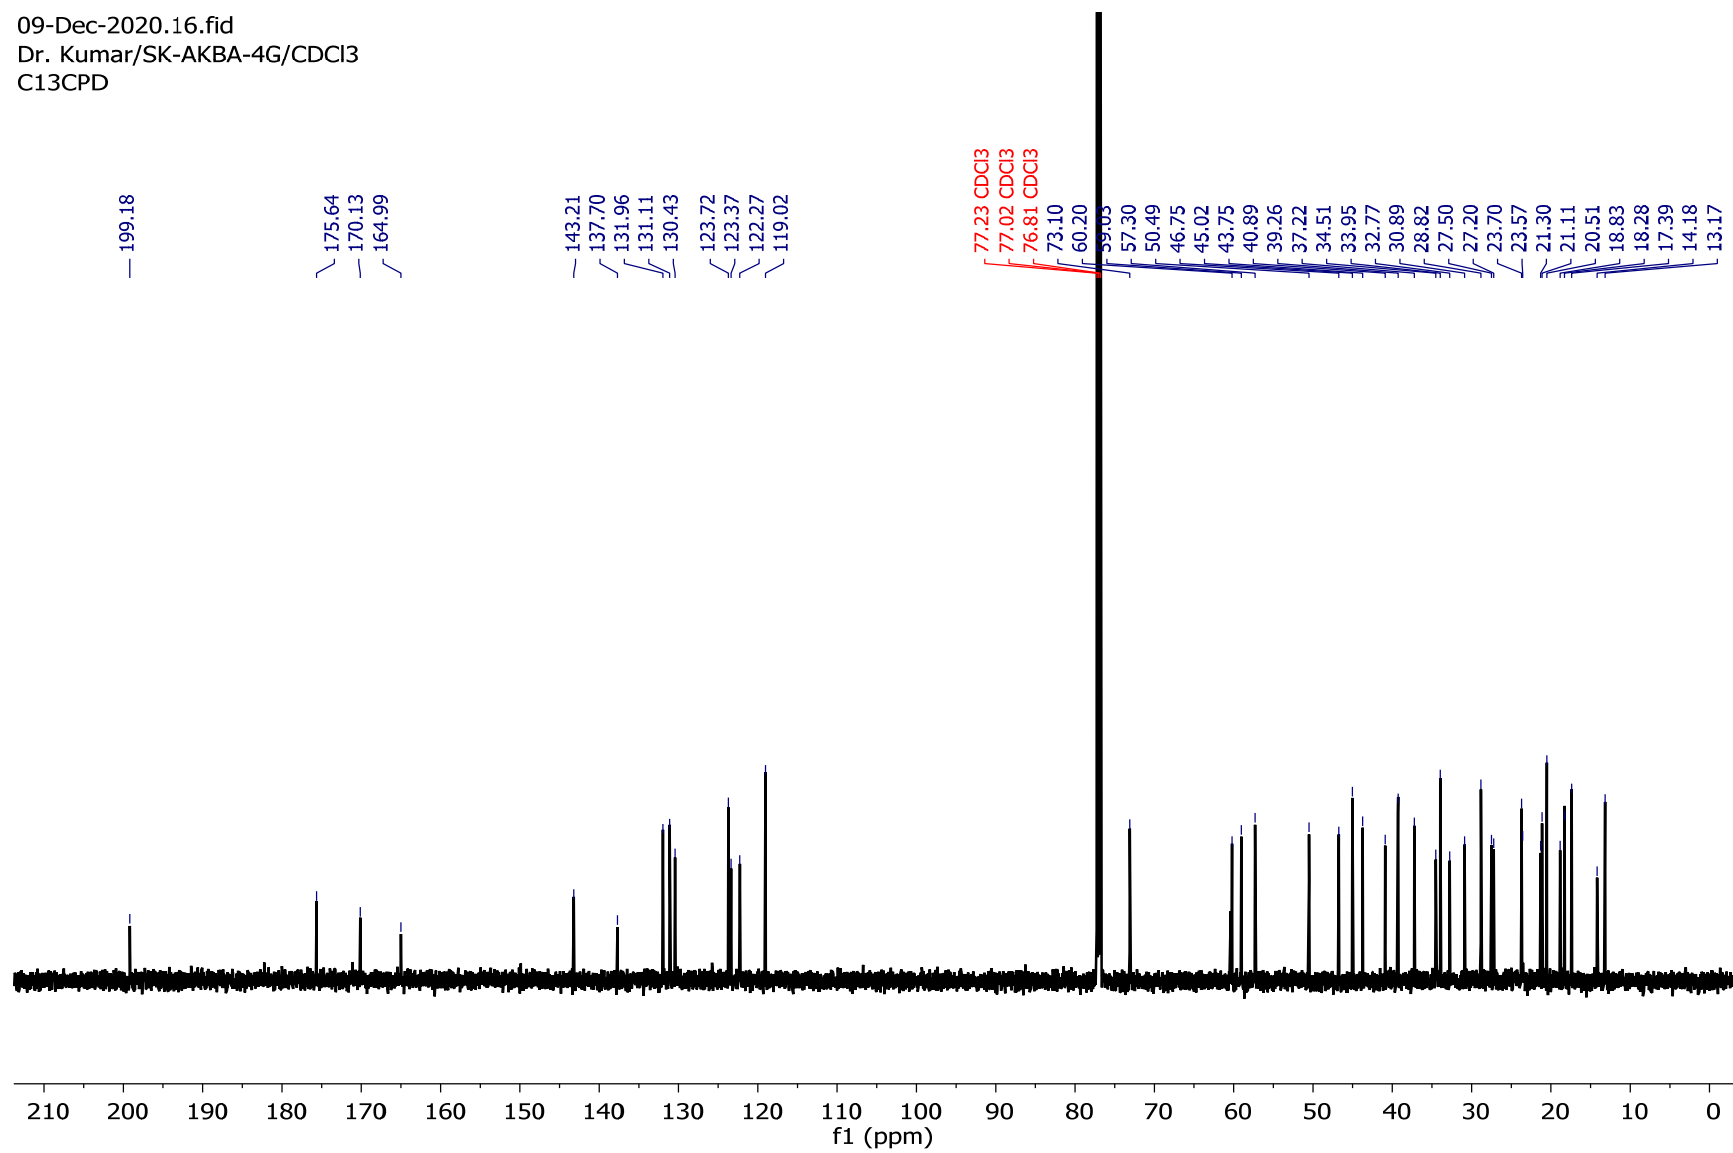

Figure S28: <sup>13</sup>C-NMR spectrum (150 MHz, CDCl<sub>3</sub>) of compound **6g**

|             |                          |                        |         |                 |                      |
|-------------|--------------------------|------------------------|---------|-----------------|----------------------|
| Sample Name | 4G                       | Position               | Vial 46 | Instrument Name | Instrument 1         |
| User Name   |                          | Inj Vol                | 2       | InjPosition     |                      |
| Sample Type | Sample                   | IRM Calibration Status | Success | Data Filename   | 4G_POS_01.d          |
| ACQ Method  | POSITIVE ION METHOD MS.m | Comment                | SK      | Acquired Time   | 20-Nov-20 6:49:35 PM |

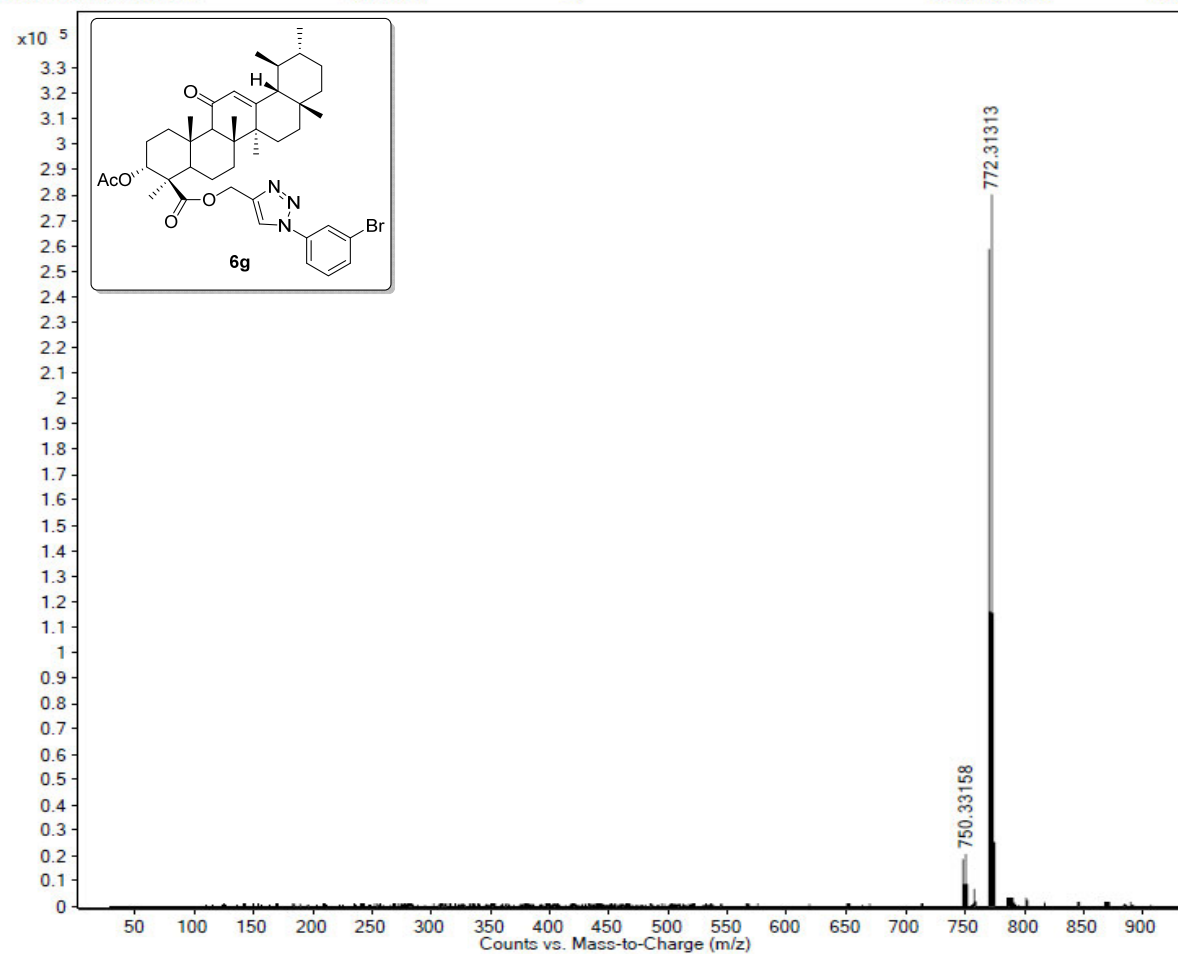

Figure S29: HRMS spectrum of compound 6g

09-Dec-2020.5.fid  
Dr. Kumar/SK-AKBA-4H/CDCl<sub>3</sub>  
PROTON

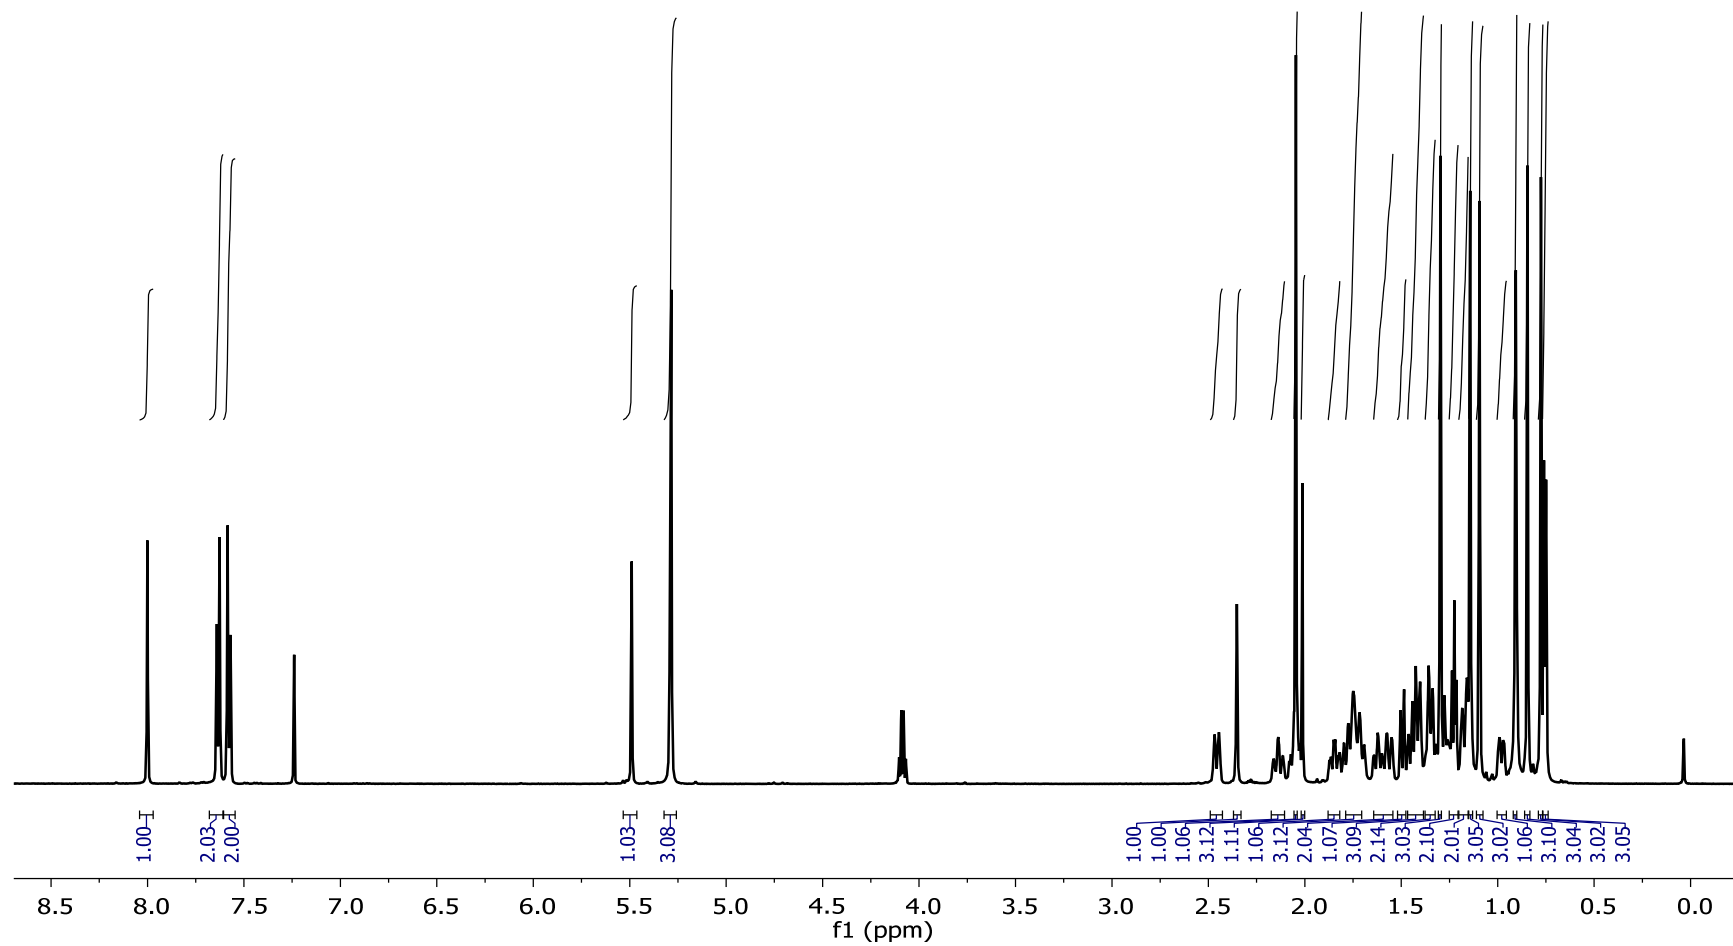

Figure S30: <sup>1</sup>H-NMR spectrum (600 MHz, CDCl<sub>3</sub>) of compound 6h

09-Dec-2020.19.fid  
Dr. Kumar/SK-AKBA-4H/CDCl<sub>3</sub>  
C13CPD

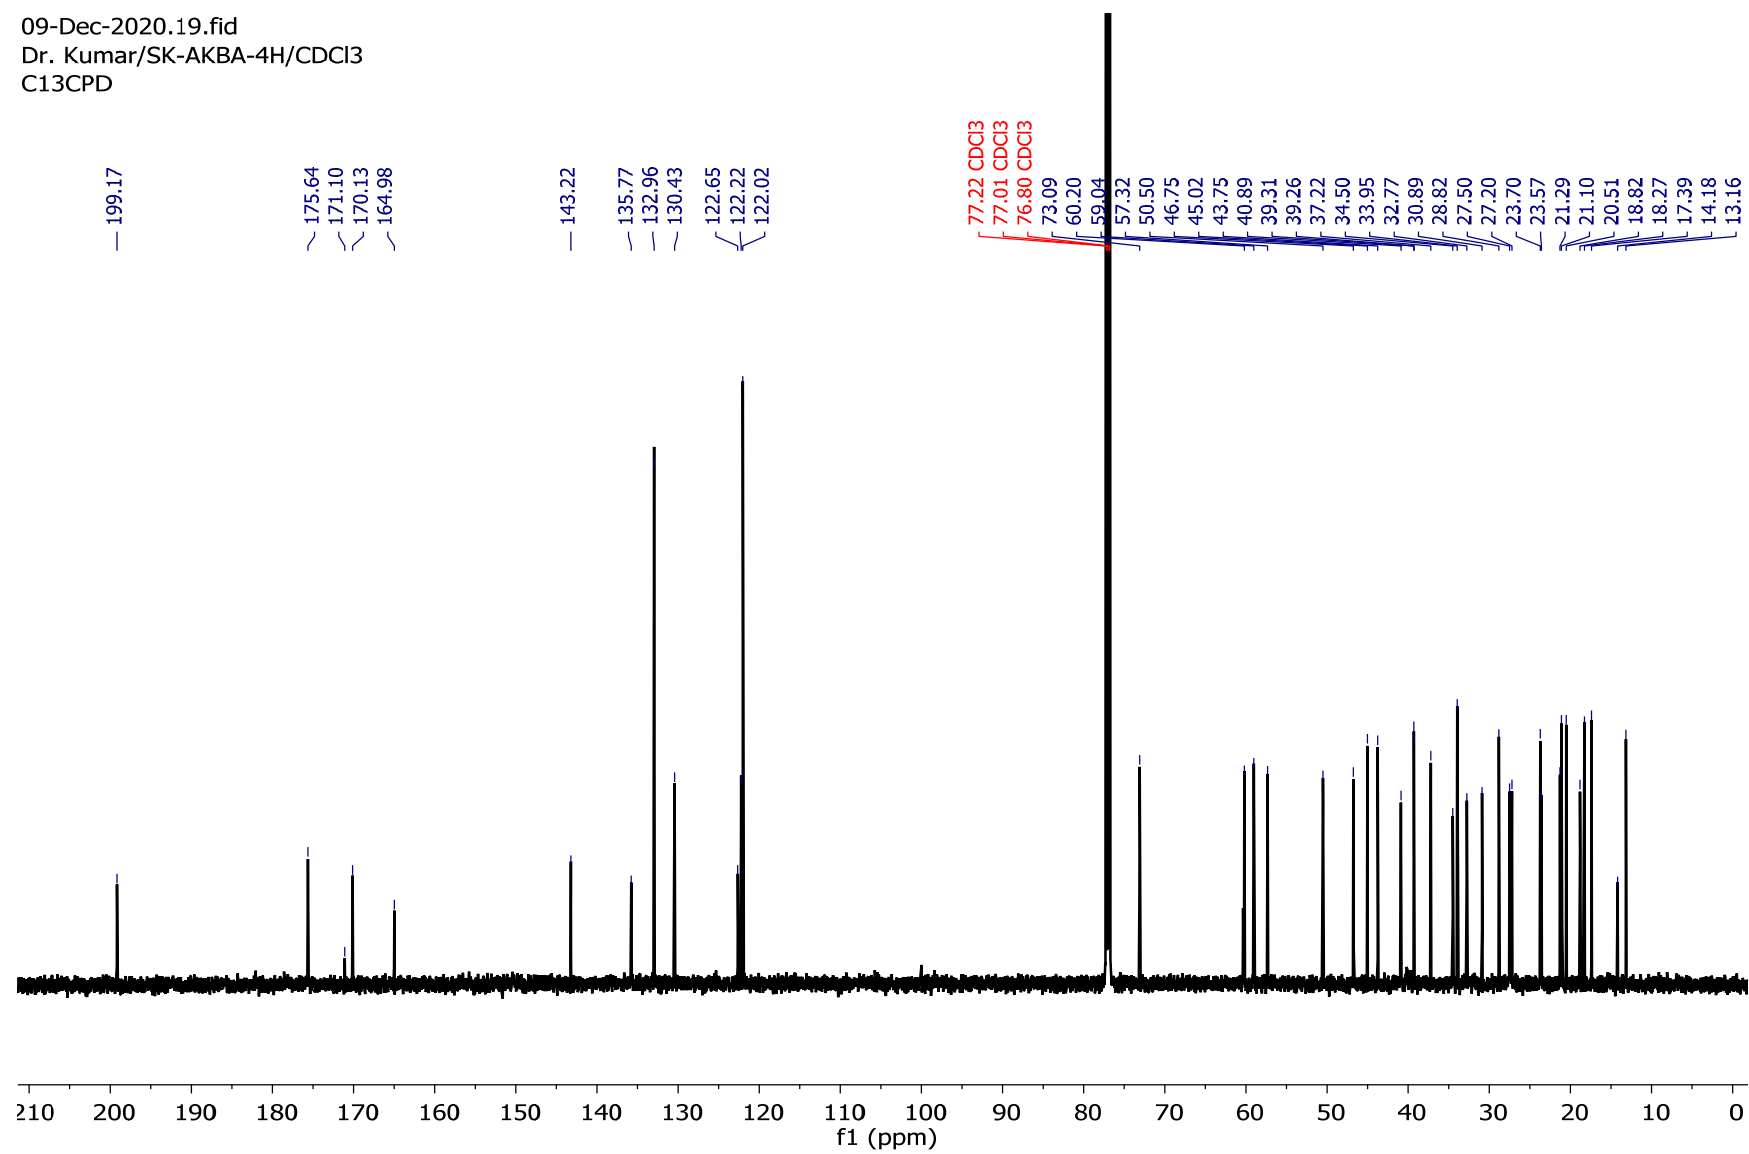

Figure S31: <sup>13</sup>C-NMR spectrum (150 MHz, CDCl<sub>3</sub>) of compound **6h**

Sample Name  
User Name  
Sample Type  
ACQ Method

4H  
Sample  
POSITIVE ION METHOD MS.m

Position  
Inj Vol  
IRM Calibration Status  
Comment

Vial 47  
2  
Success  
SK

Instrument Name  
InjPosition  
Data Filename  
Acquired Time

Instrument 1  
Instrument 1  
4H\_POS\_02.d  
20-Nov-20 6:55:10 PM

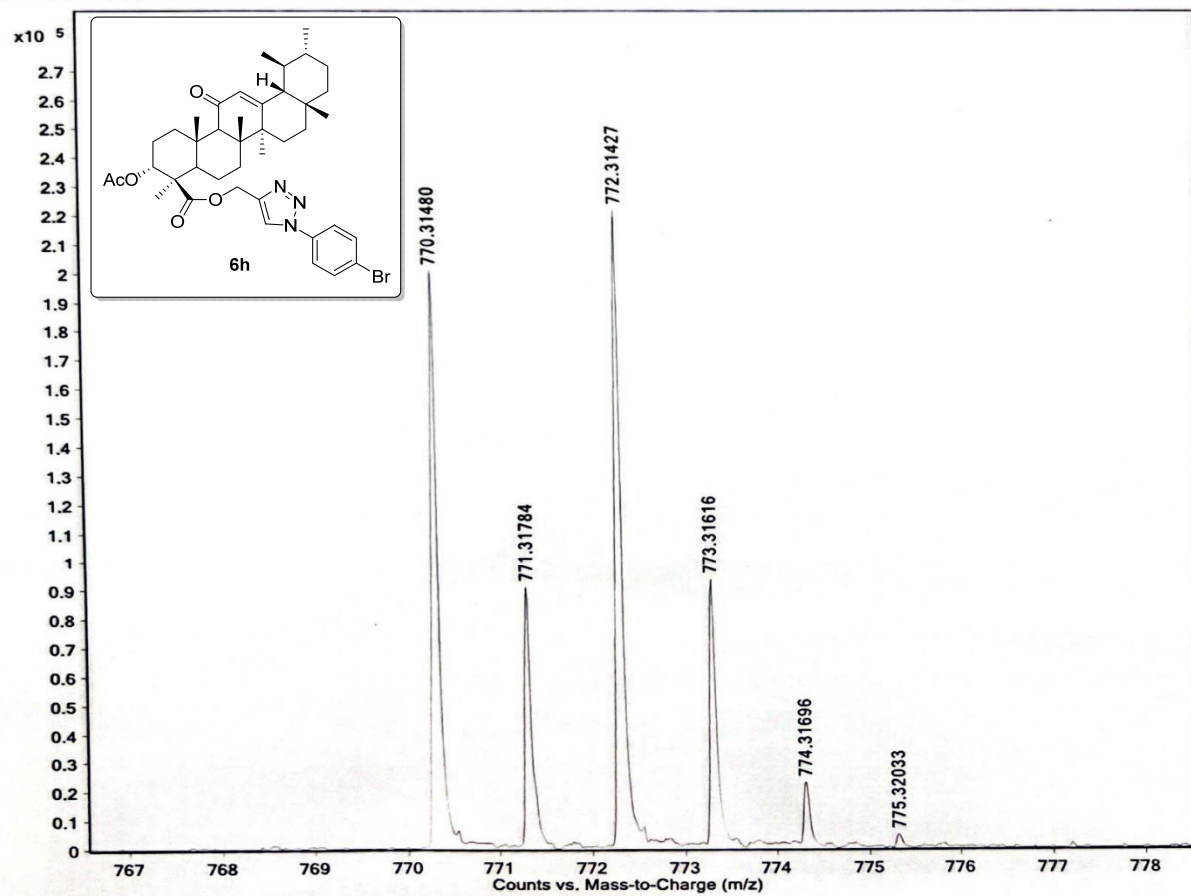

Figure S32: HRMS spectrum of compound 6h

28-Dec-2020.4.fid  
Dr. Kumar/SK-AKBA-4i/CDCl<sub>3</sub>  
PROTON

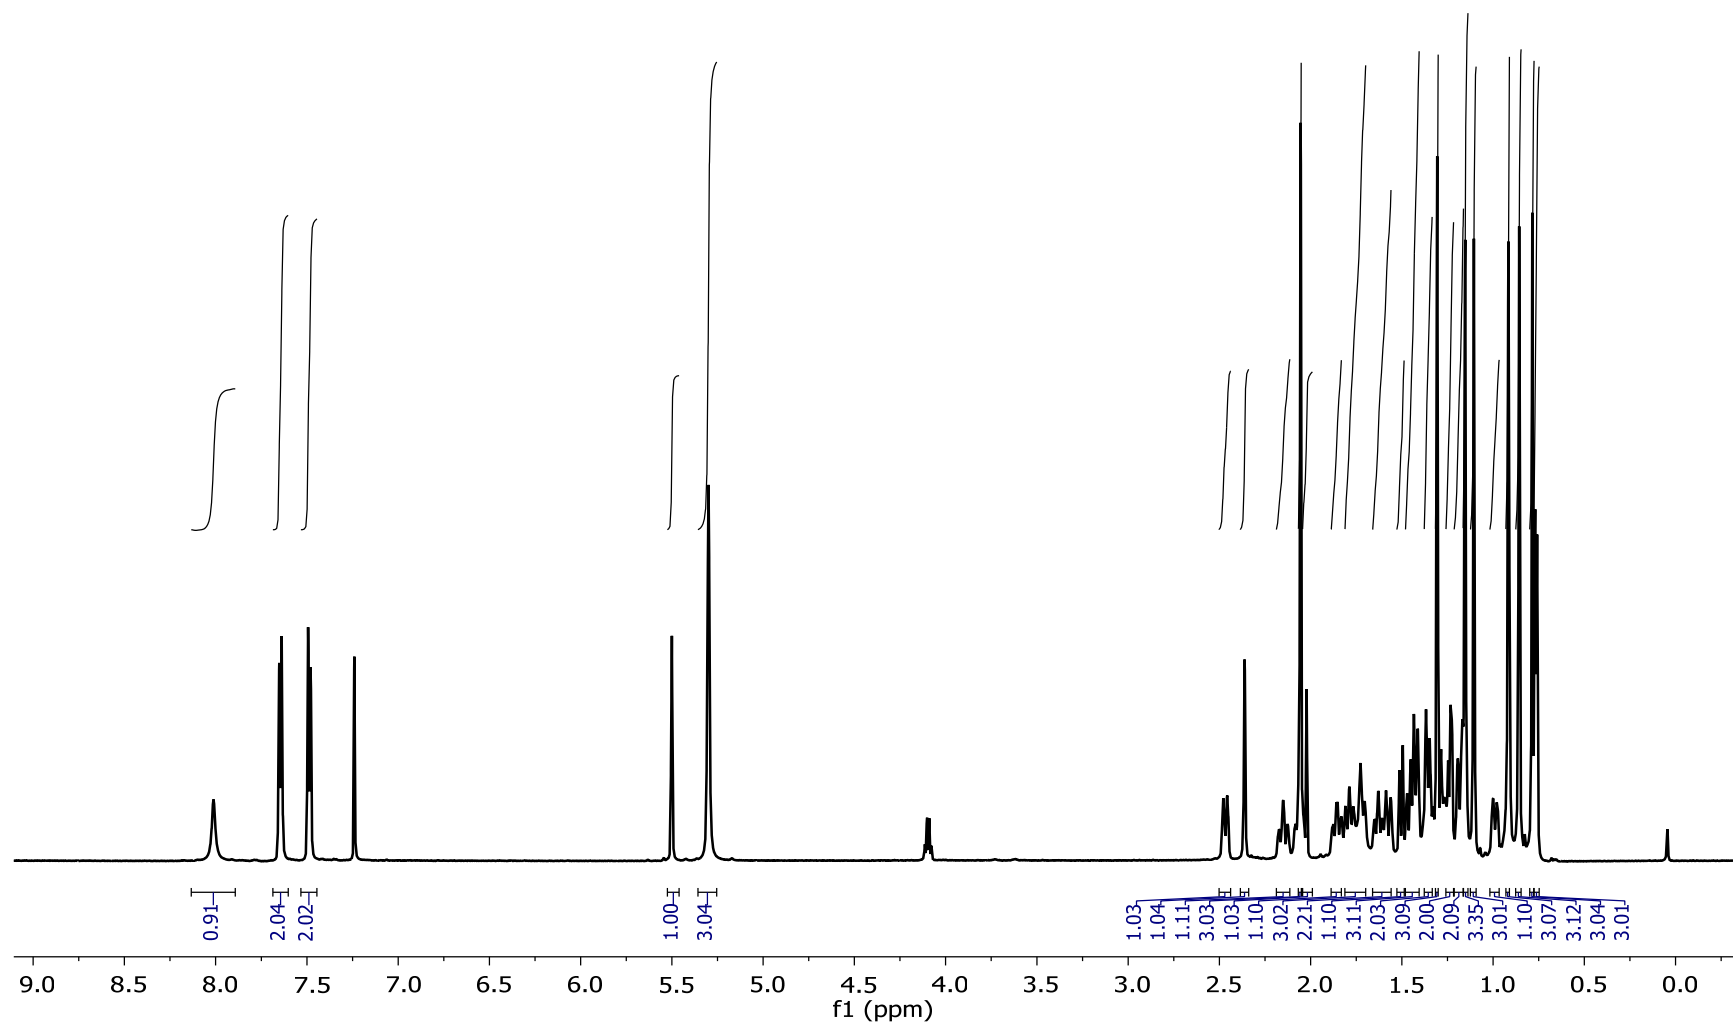

Figure S33: <sup>1</sup>H-NMR spectrum (600 MHz, CDCl<sub>3</sub>) of compound 6i

28-Dec-2020.10.fid  
Dr. Kumar/SK-AKBA-4i/CDCl<sub>3</sub>  
C13CPD

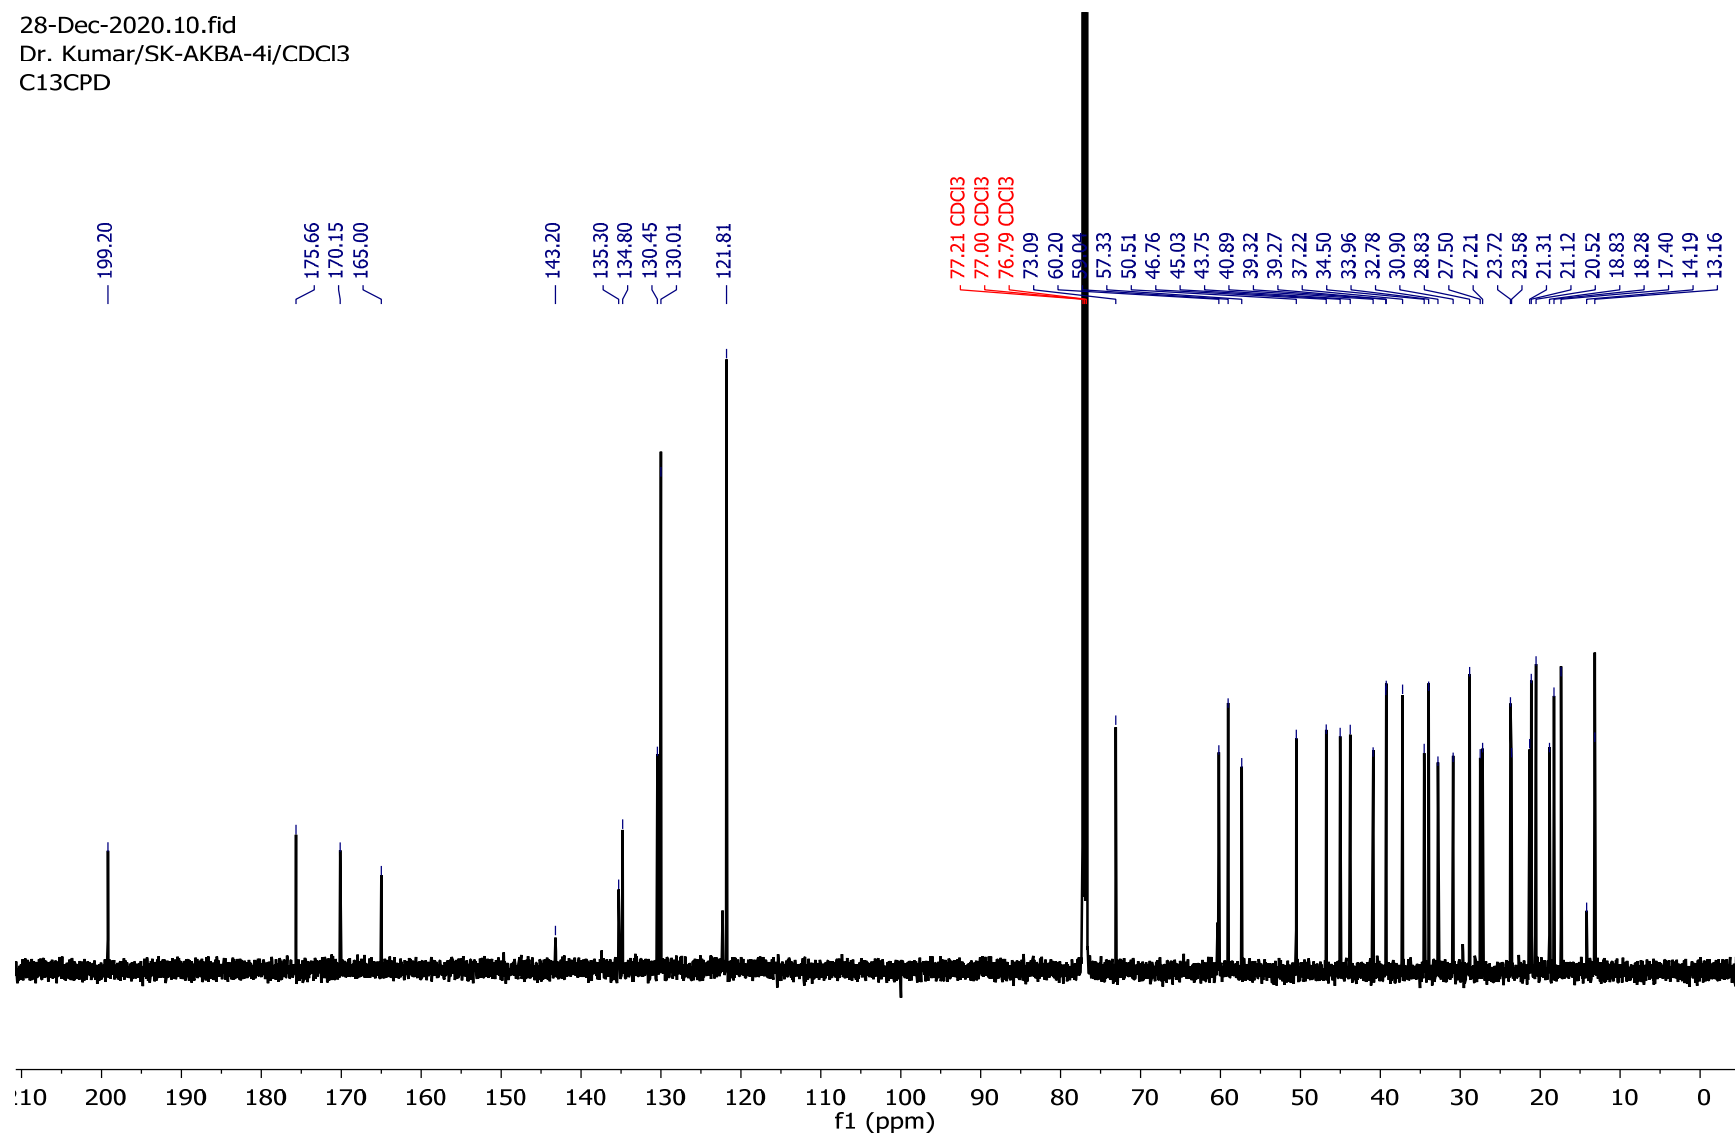

Figure S34: <sup>13</sup>C-NMR spectrum (150 MHz, CDCl<sub>3</sub>) of compound **6i**

|             |                          |                        |         |                 |                      |
|-------------|--------------------------|------------------------|---------|-----------------|----------------------|
| Sample Name | SK-AKBA-4I               | Position               | Vial 1  | Instrument Name | Instrument 1         |
| User Name   |                          | Inj Vol                | 2       | InjPosition     |                      |
| Sample Type | Sample                   | IRM Calibration Status | Success | Data Filename   | SK-AKBA-4I_POS_01.d  |
| ACQ Method  | POSITIVE ION METHOD MS.m | Comment                | SK      | Acquired Time   | 28-Dec-20 2:32:25 PM |

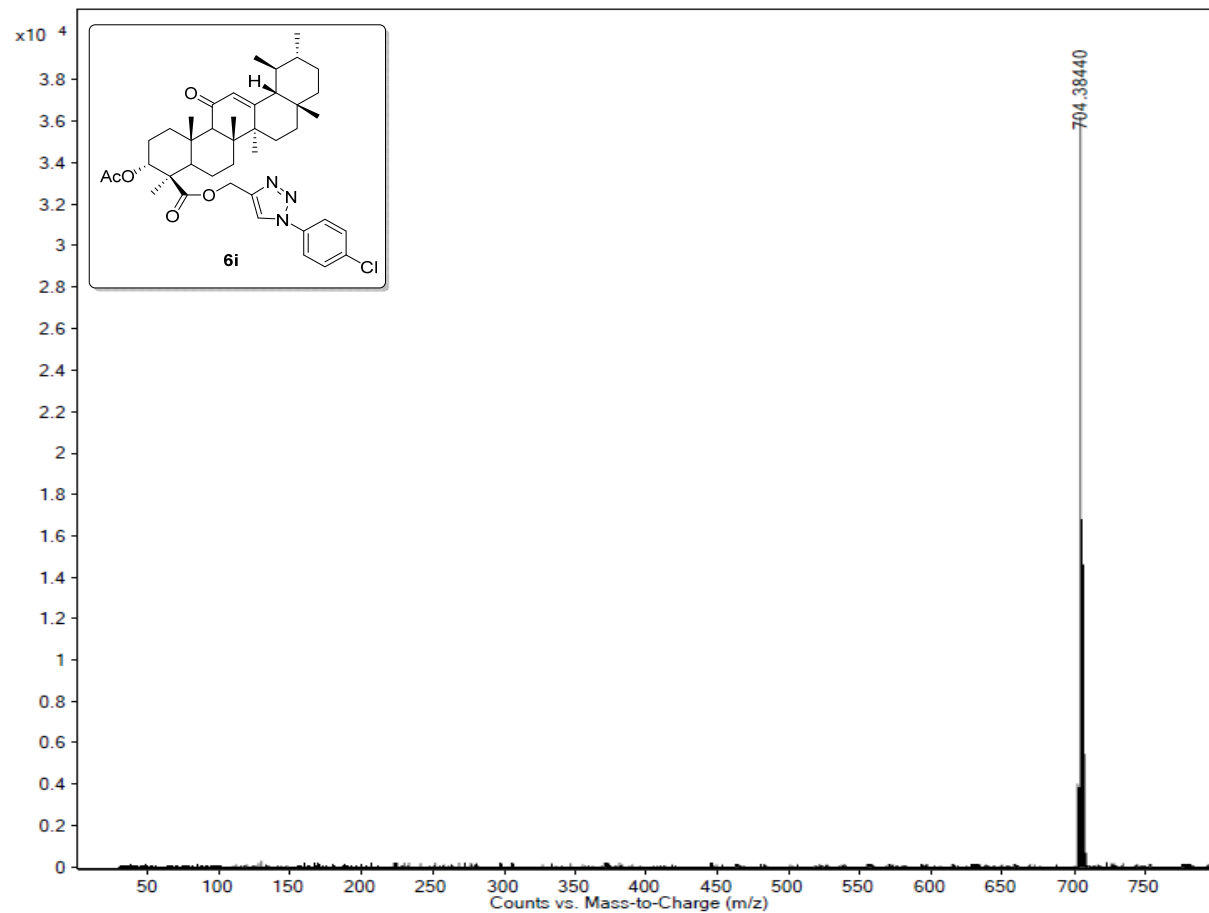

Figure S35: HRMS spectrum of compound **6i**



28-Dec-2020.6.fid  
Dr. Kumar/SK-AKBA-4j/CDCl<sub>3</sub>  
PROTON

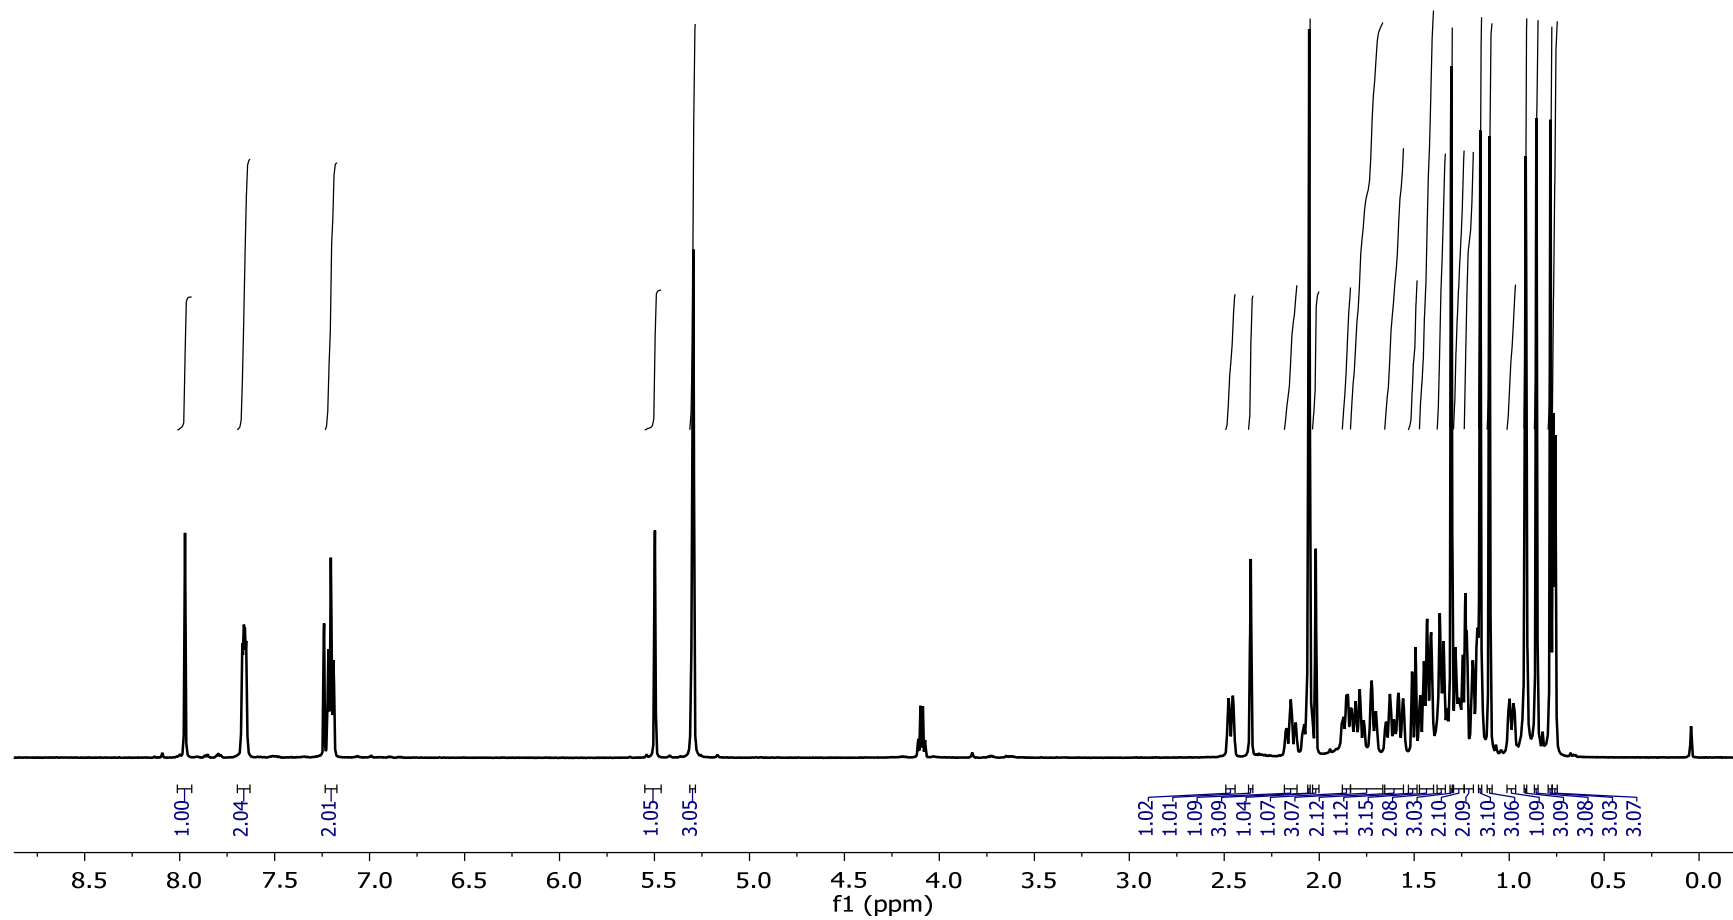

Figure S36: <sup>1</sup>H-NMR spectrum (600 MHz, CDCl<sub>3</sub>) of compound 6j

28-Dec-2020.18.fid  
Dr. Kumar/SK-AKBA-4j/CDCl<sub>3</sub>  
C13CPD

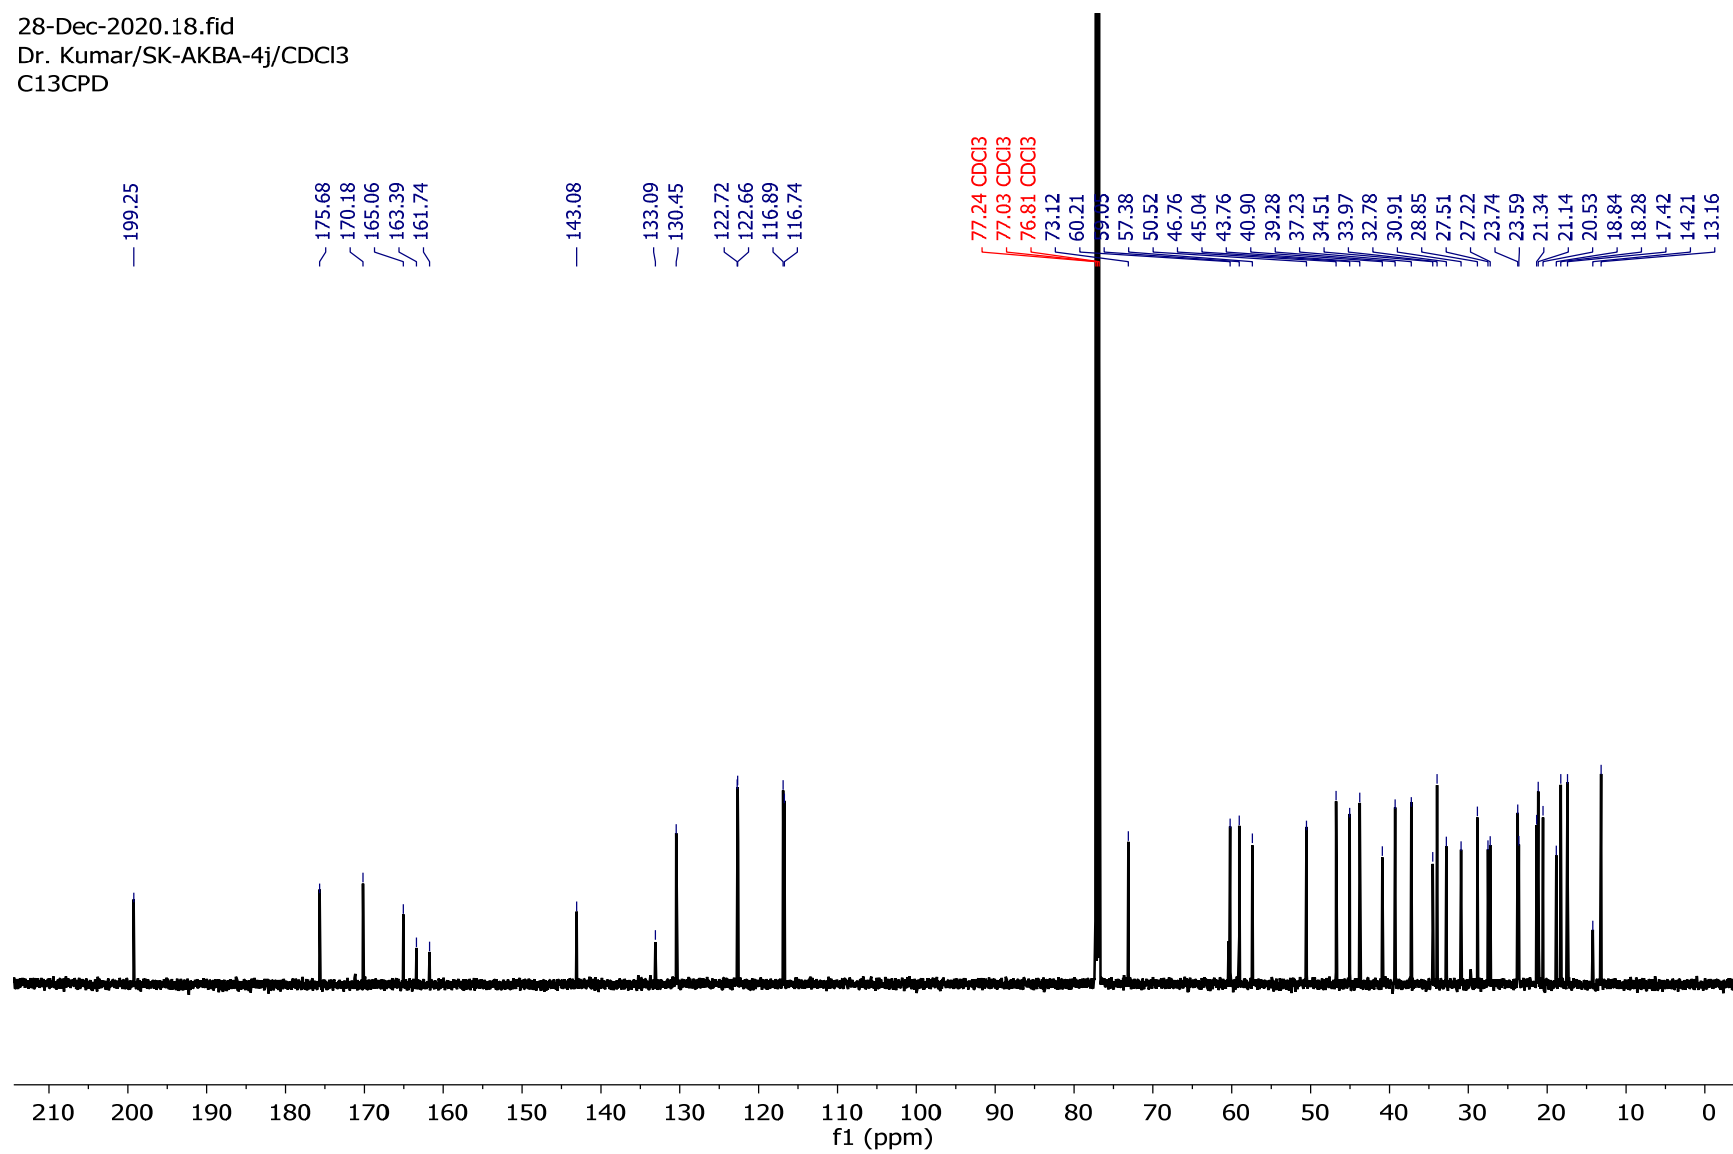

Figure S37: <sup>13</sup>C-NMR spectrum (150 MHz, CDCl<sub>3</sub>) of compound **6j**

28-Dec-2020.7.fid  
Dr. Kumar/SK-AKBA-4j/CDCl<sub>3</sub>  
F19CPD

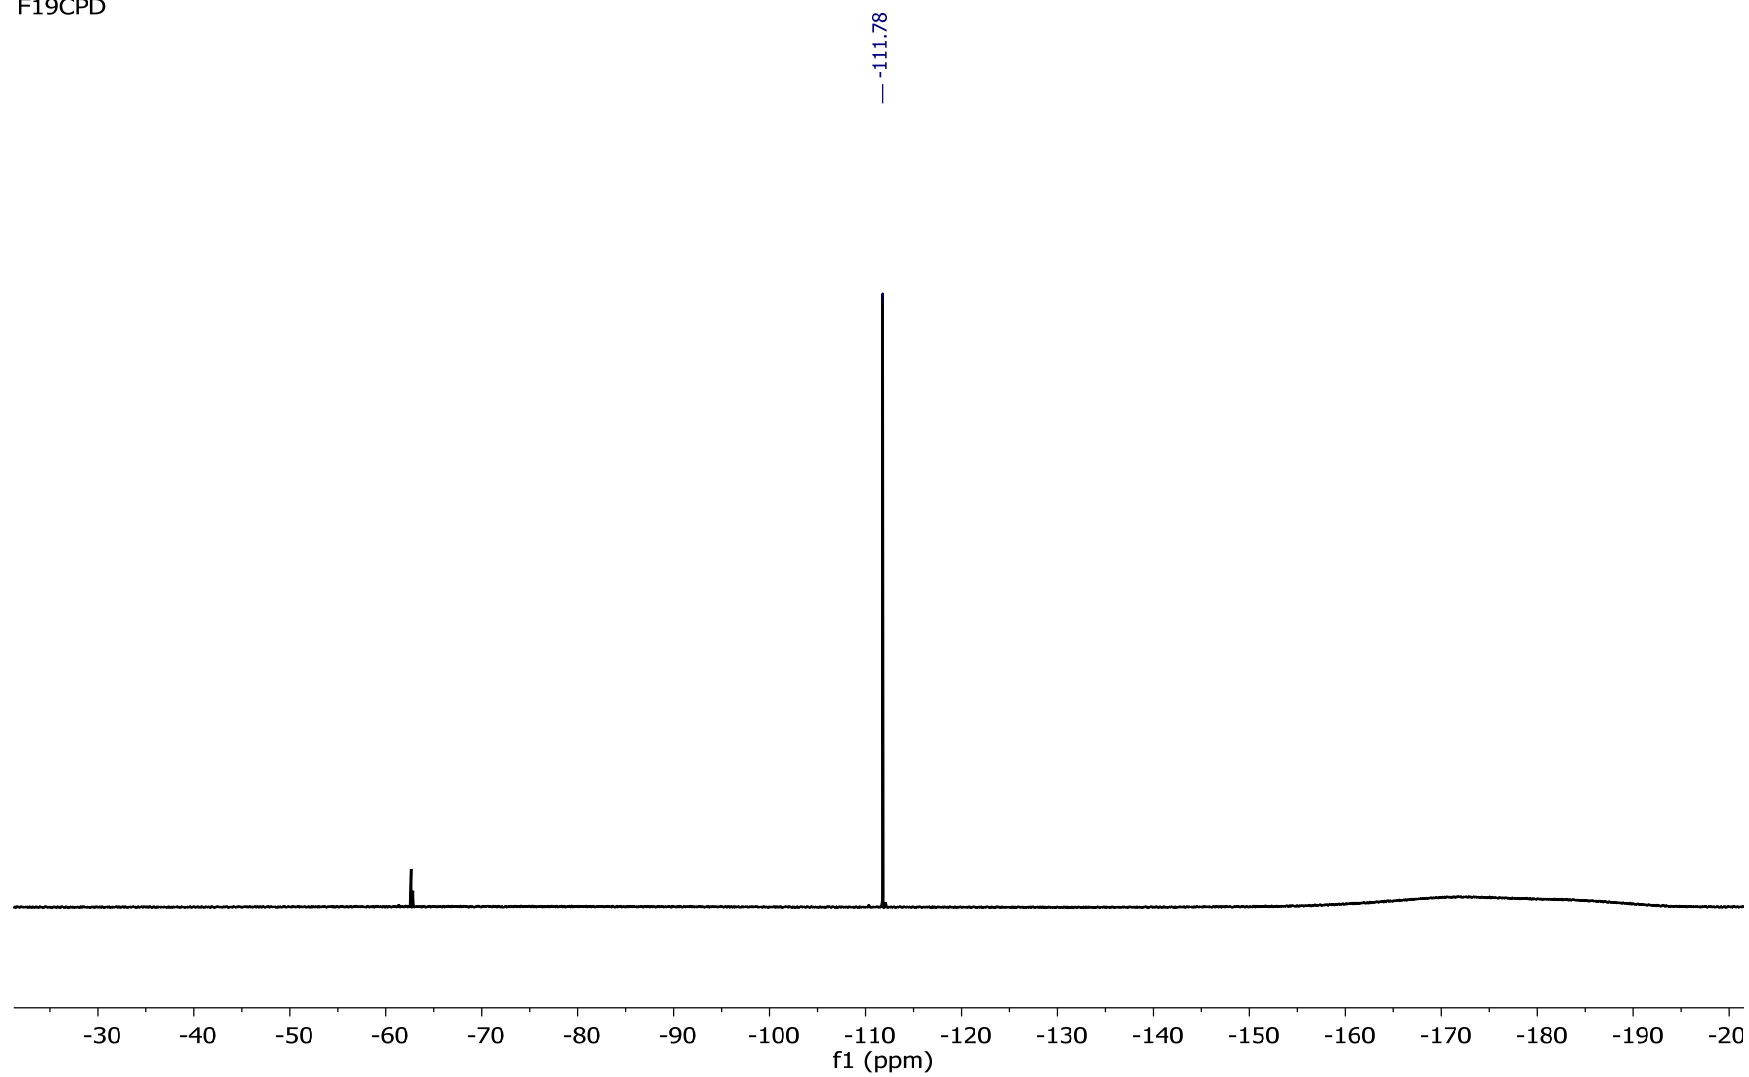

Figure S38: <sup>19</sup>F-NMR spectrum (564 MHz, CDCl<sub>3</sub>) of compound **6j**

|             |                          |                        |         |                 |                      |
|-------------|--------------------------|------------------------|---------|-----------------|----------------------|
| Sample Name | SK-AKBA-4J               | Position               | Vial 2  | Instrument Name | Instrument 1         |
| User Name   |                          | Inj Vol                | 2       | InjPosition     |                      |
| Sample Type | Sample                   | IRM Calibration Status | Success | Data Filename   | SK-AKBA-4J_POS_01.d  |
| ACQ Method  | POSITIVE ION METHOD MS.m | Comment                | SK      | Acquired Time   | 28-Dec-20 2:38:01 PM |

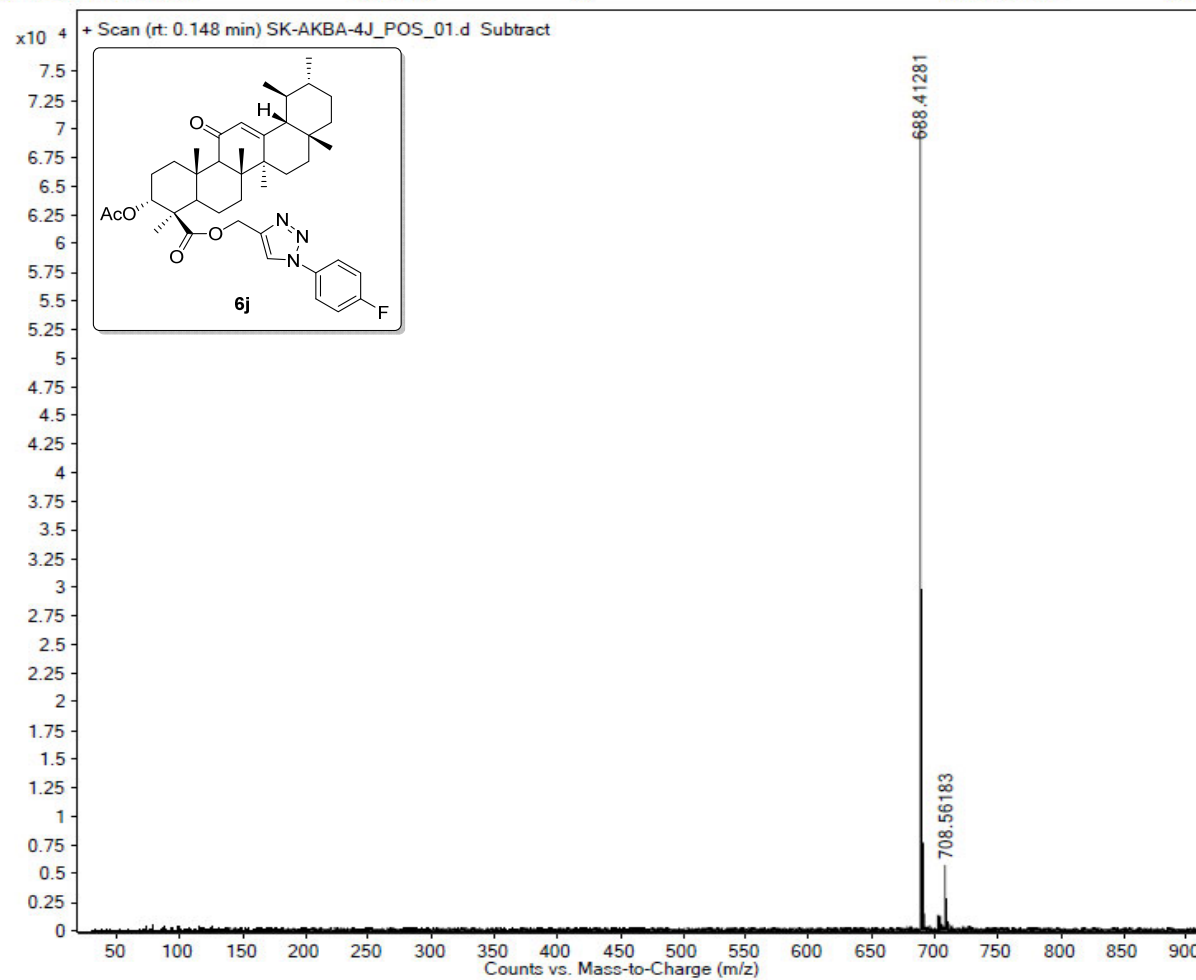

Figure S39: HRMS spectrum of compound **6j**

28-Dec-2020.8.fid  
Dr. Kumar/SK-AKBA-4k/CDCl<sub>3</sub>  
PROTON

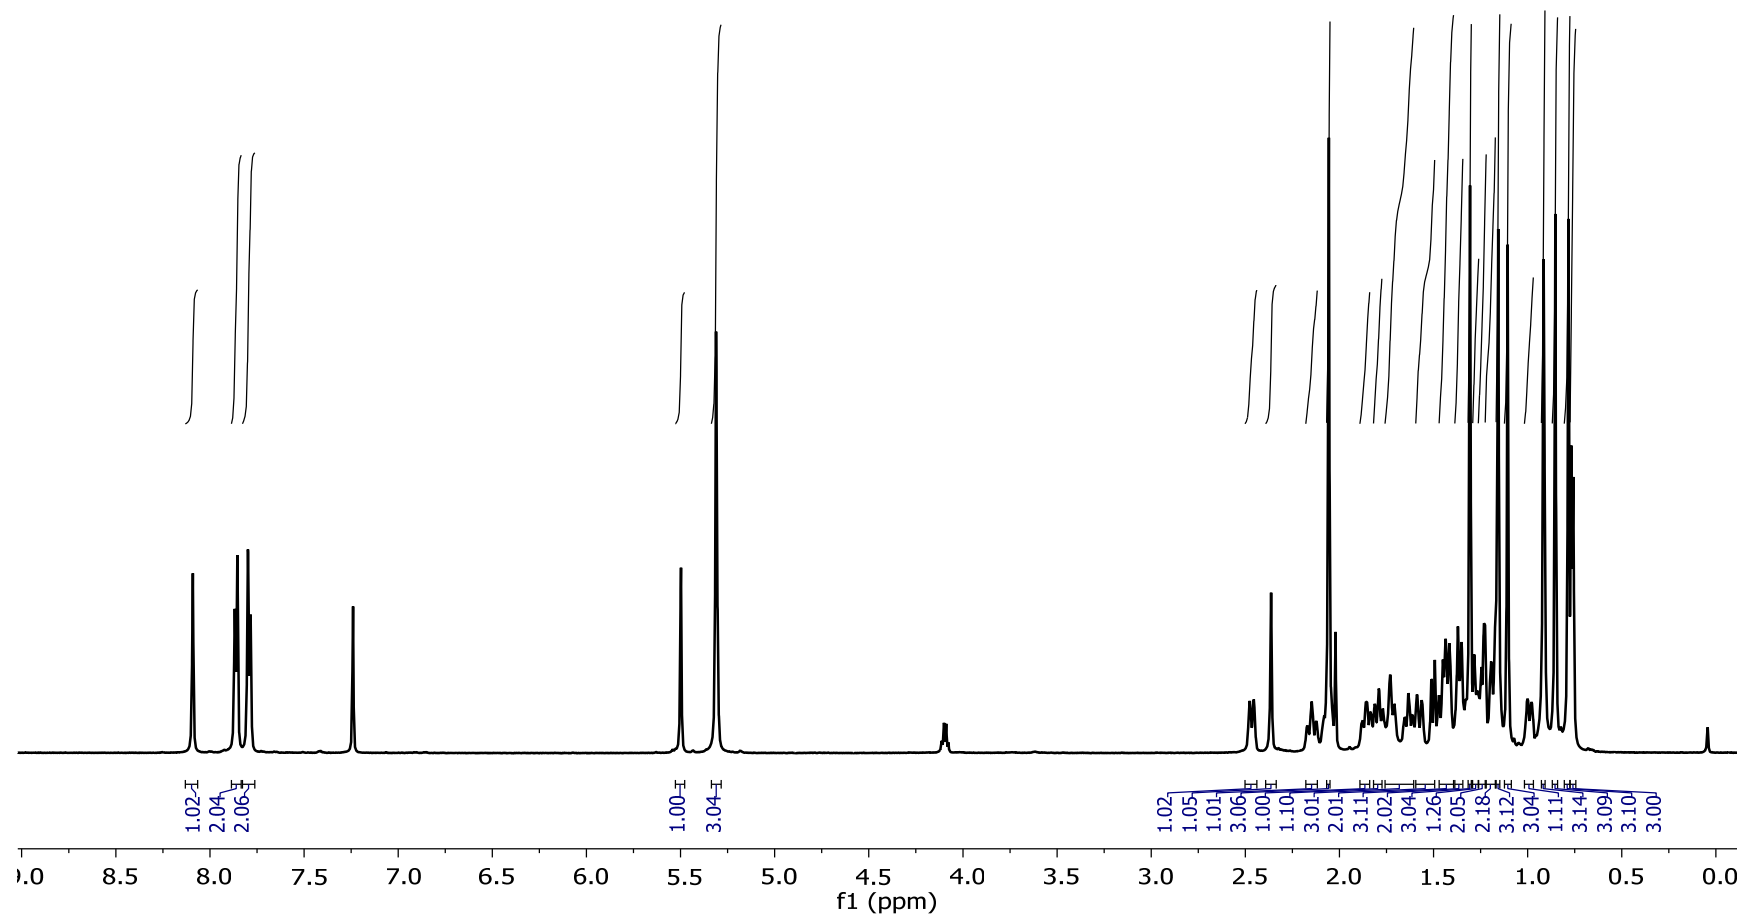

Figure S40: <sup>1</sup>H-NMR spectrum (600 MHz, CDCl<sub>3</sub>) of compound **6k**

28-Dec-2020.17.fid  
Dr. Kumar/SK-AKBA-4k/CDCl<sub>3</sub>  
C13CPD

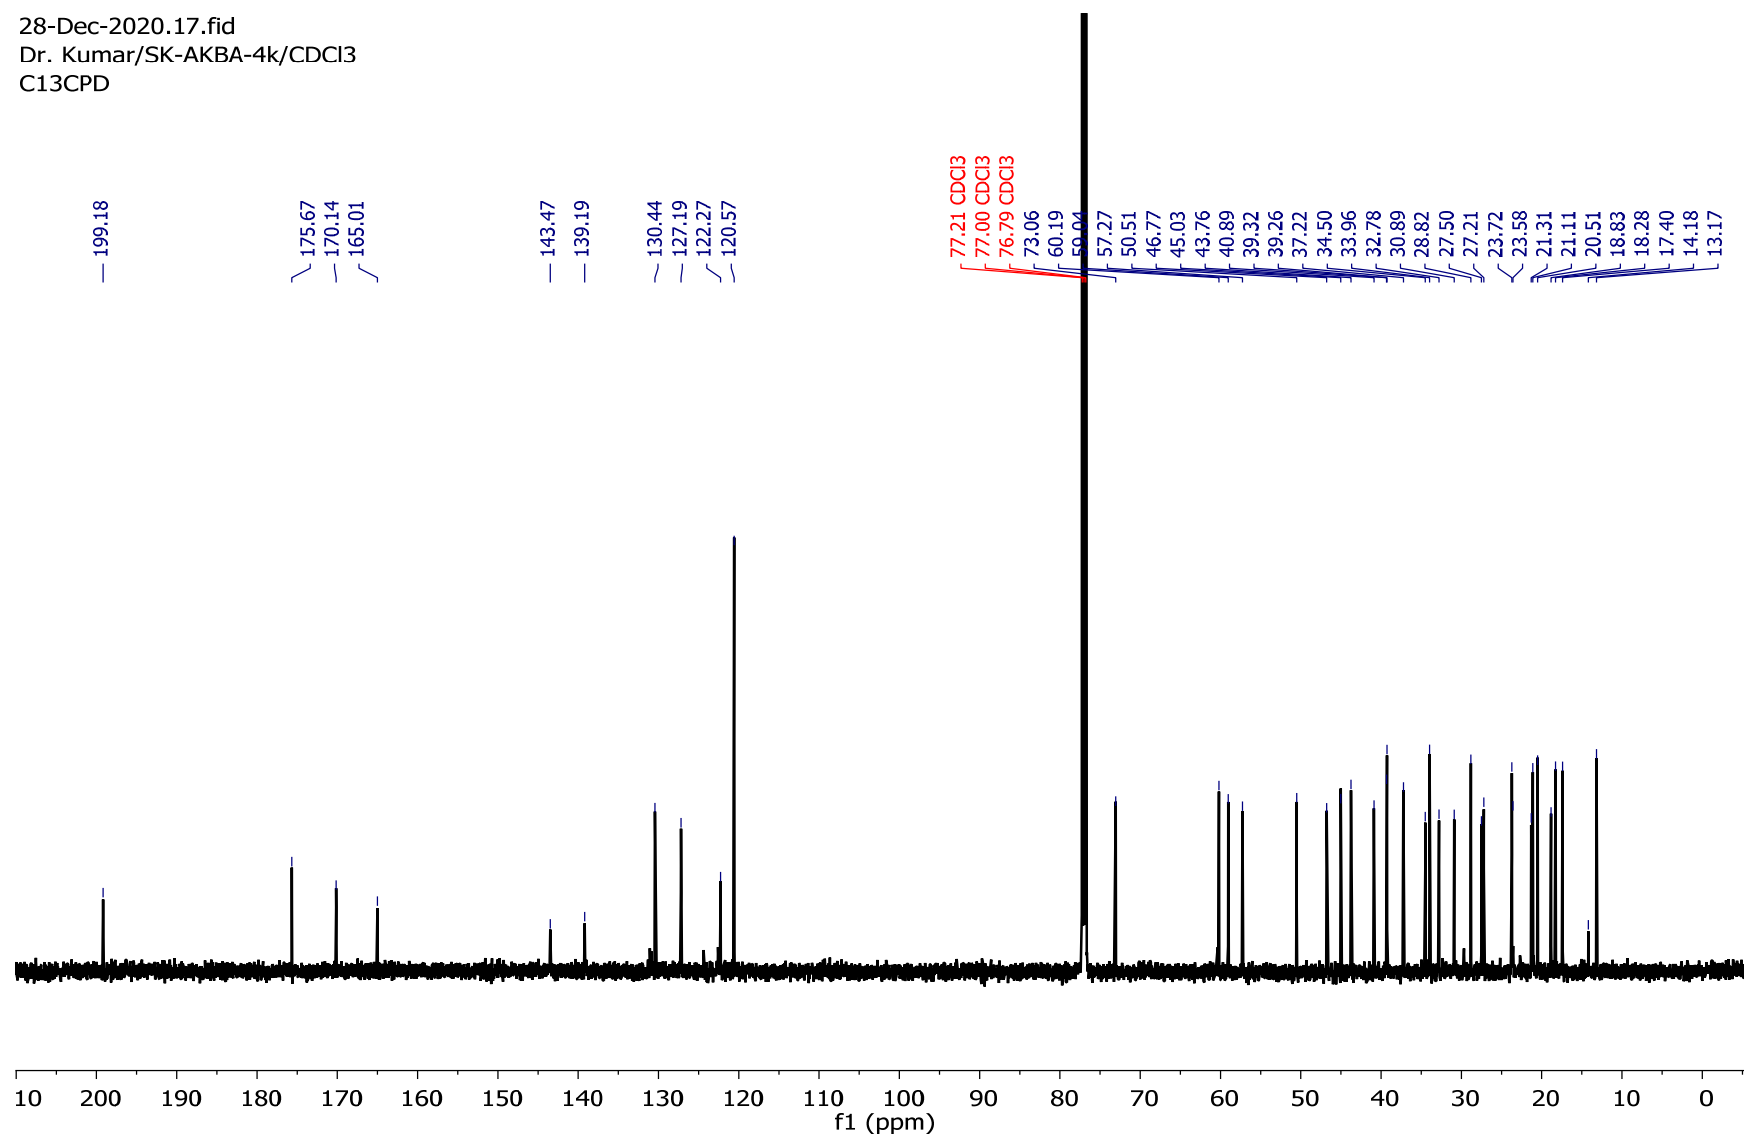

Figure S41: <sup>13</sup>C-NMR spectrum (150 MHz, CDCl<sub>3</sub>) of compound 6k

28-Dec-2020.9.fid  
Dr. Kumar/SK-AKBA-4k/CDCl<sub>3</sub>  
F19CPD

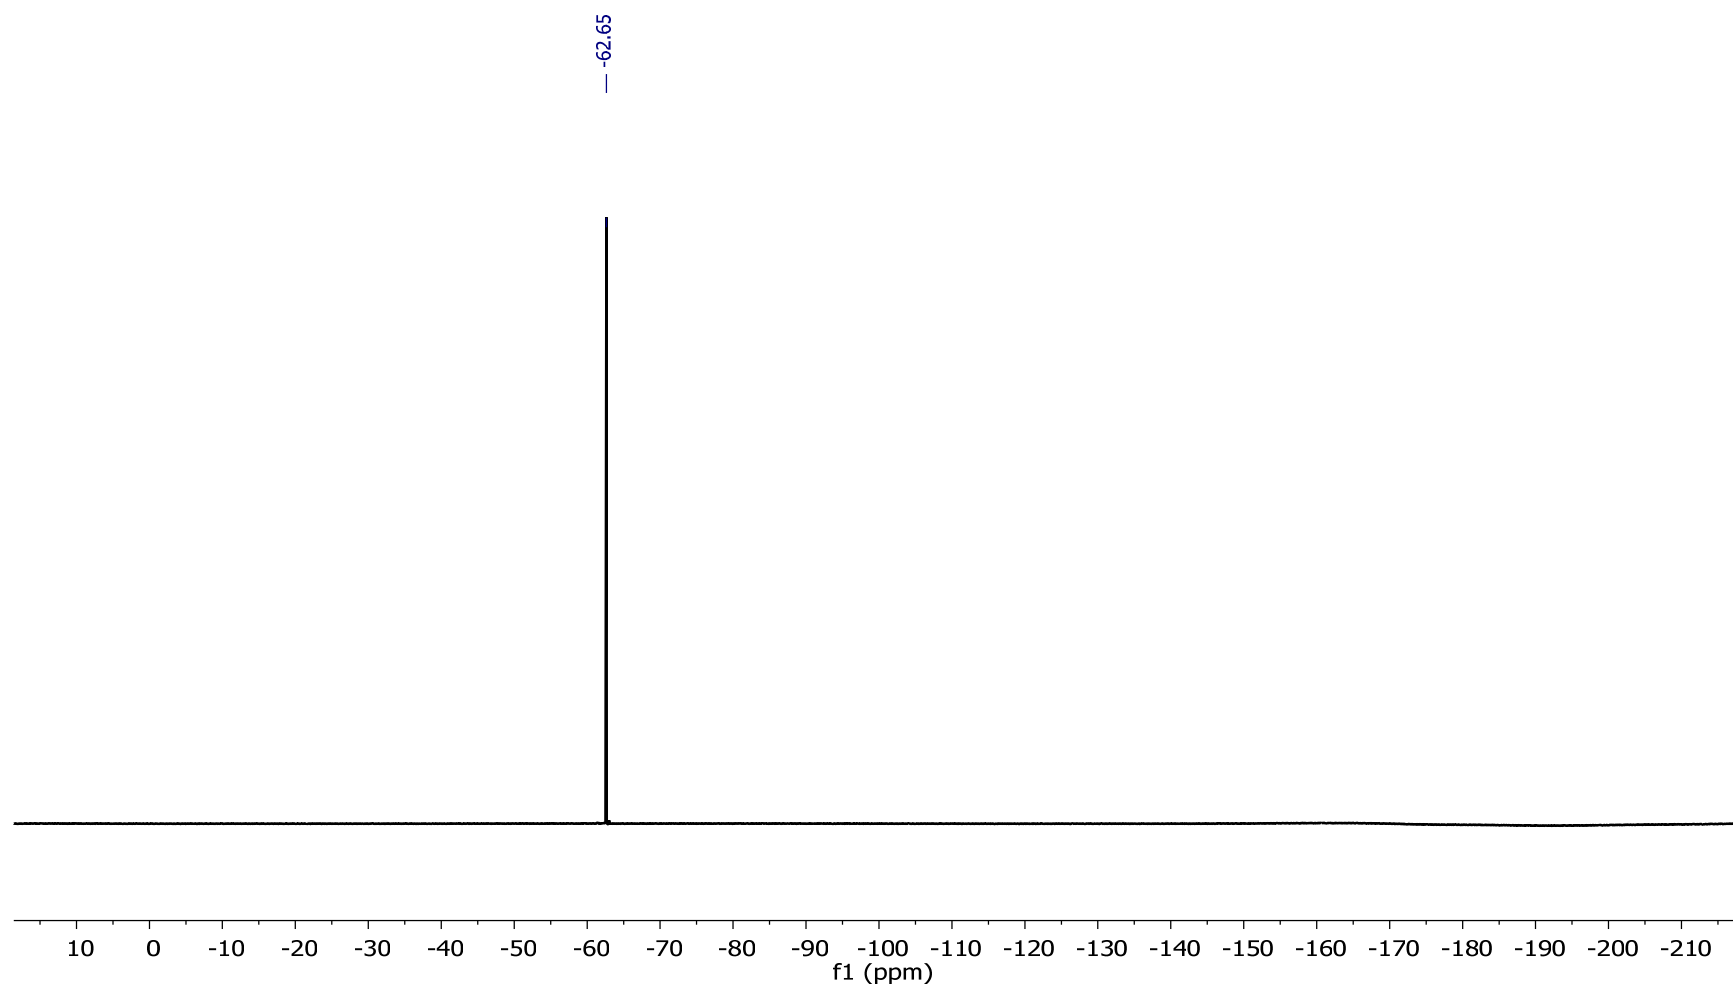

**Figure S42:** <sup>19</sup>F-NMR spectrum (564 MHz, CDCl<sub>3</sub>) of compound **6k**

|             |                          |                        |         |                 |                      |
|-------------|--------------------------|------------------------|---------|-----------------|----------------------|
| Sample Name | SK-AKBA-4K               | Position               | Vial 3  | Instrument Name | Instrument 1         |
| User Name   |                          | Inj Vol                | 2       | InjPosition     |                      |
| Sample Type | Sample                   | IRM Calibration Status | Success | Data Filename   | SK-AKBA-4K_POS_01.d  |
| ACQ Method  | POSITIVE ION METHOD MS.m | Comment                | SK      | Acquired Time   | 28-Dec-20 2:43:36 PM |

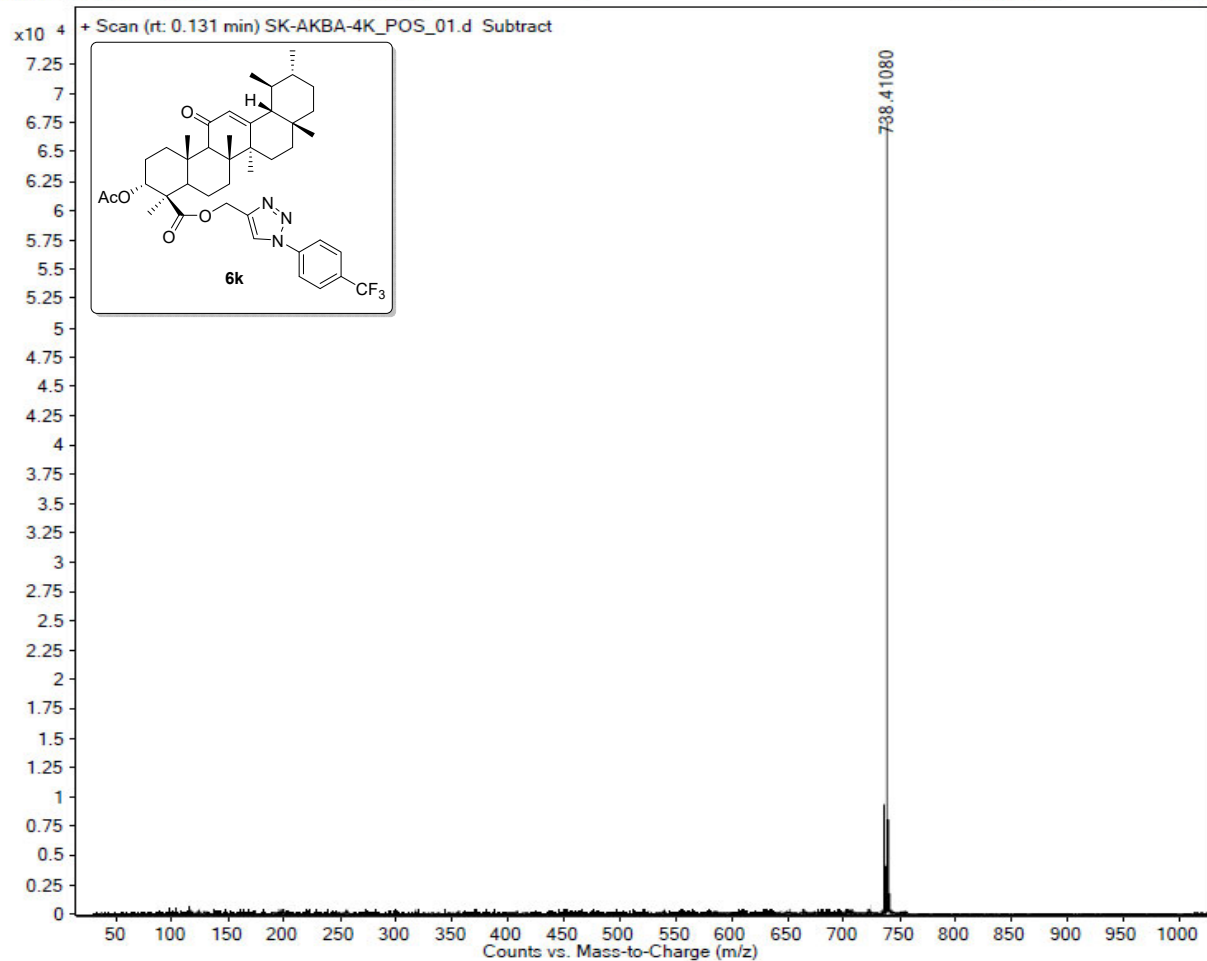

Figure S43: HRMS spectrum of compound 6k



07-Mar-2021.18.fid  
Dr. A. Satya Kumar / SK-KBA-7a / CDCl<sub>3</sub>  
PROTON

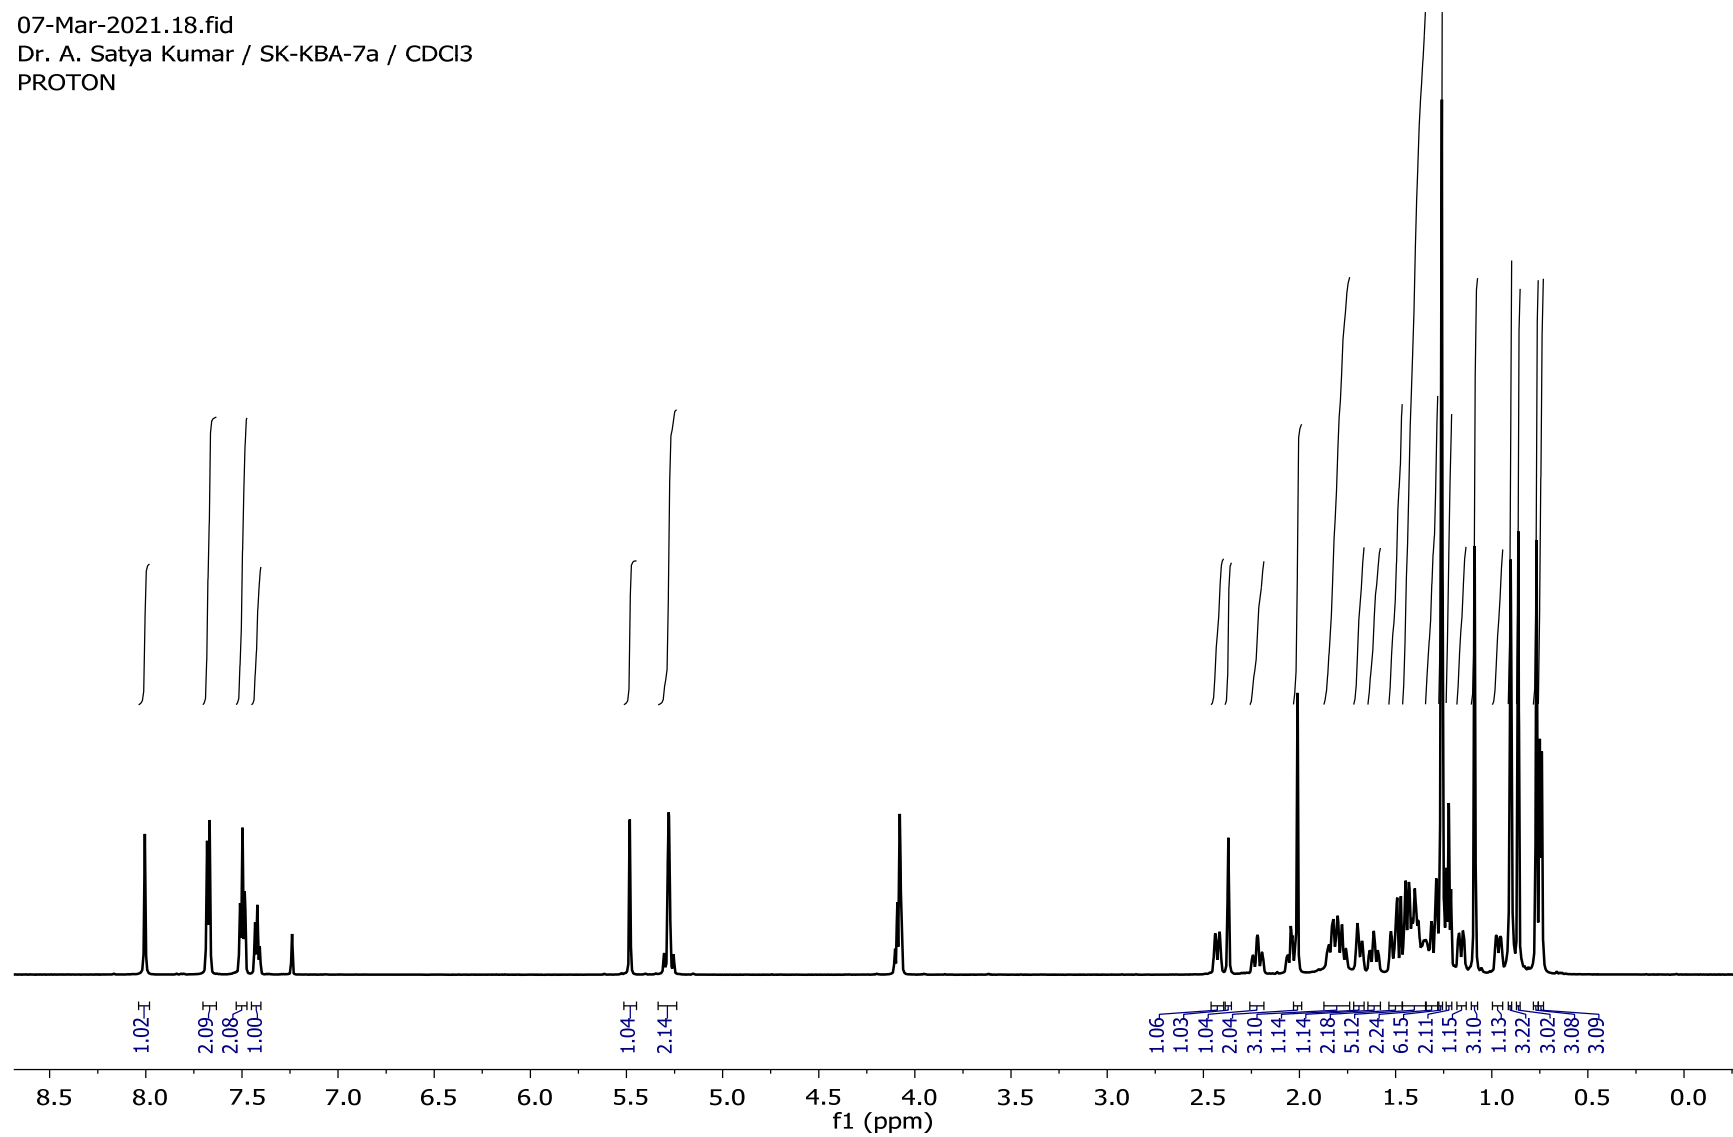

Figure S44: <sup>1</sup>H-NMR spectrum (600 MHz, CDCl<sub>3</sub>) of compound 7a

07-Mar-2021.19.fid  
Dr. A. Satya Kumar / SK-KBA-7a / CDCl<sub>3</sub>  
C13CPD

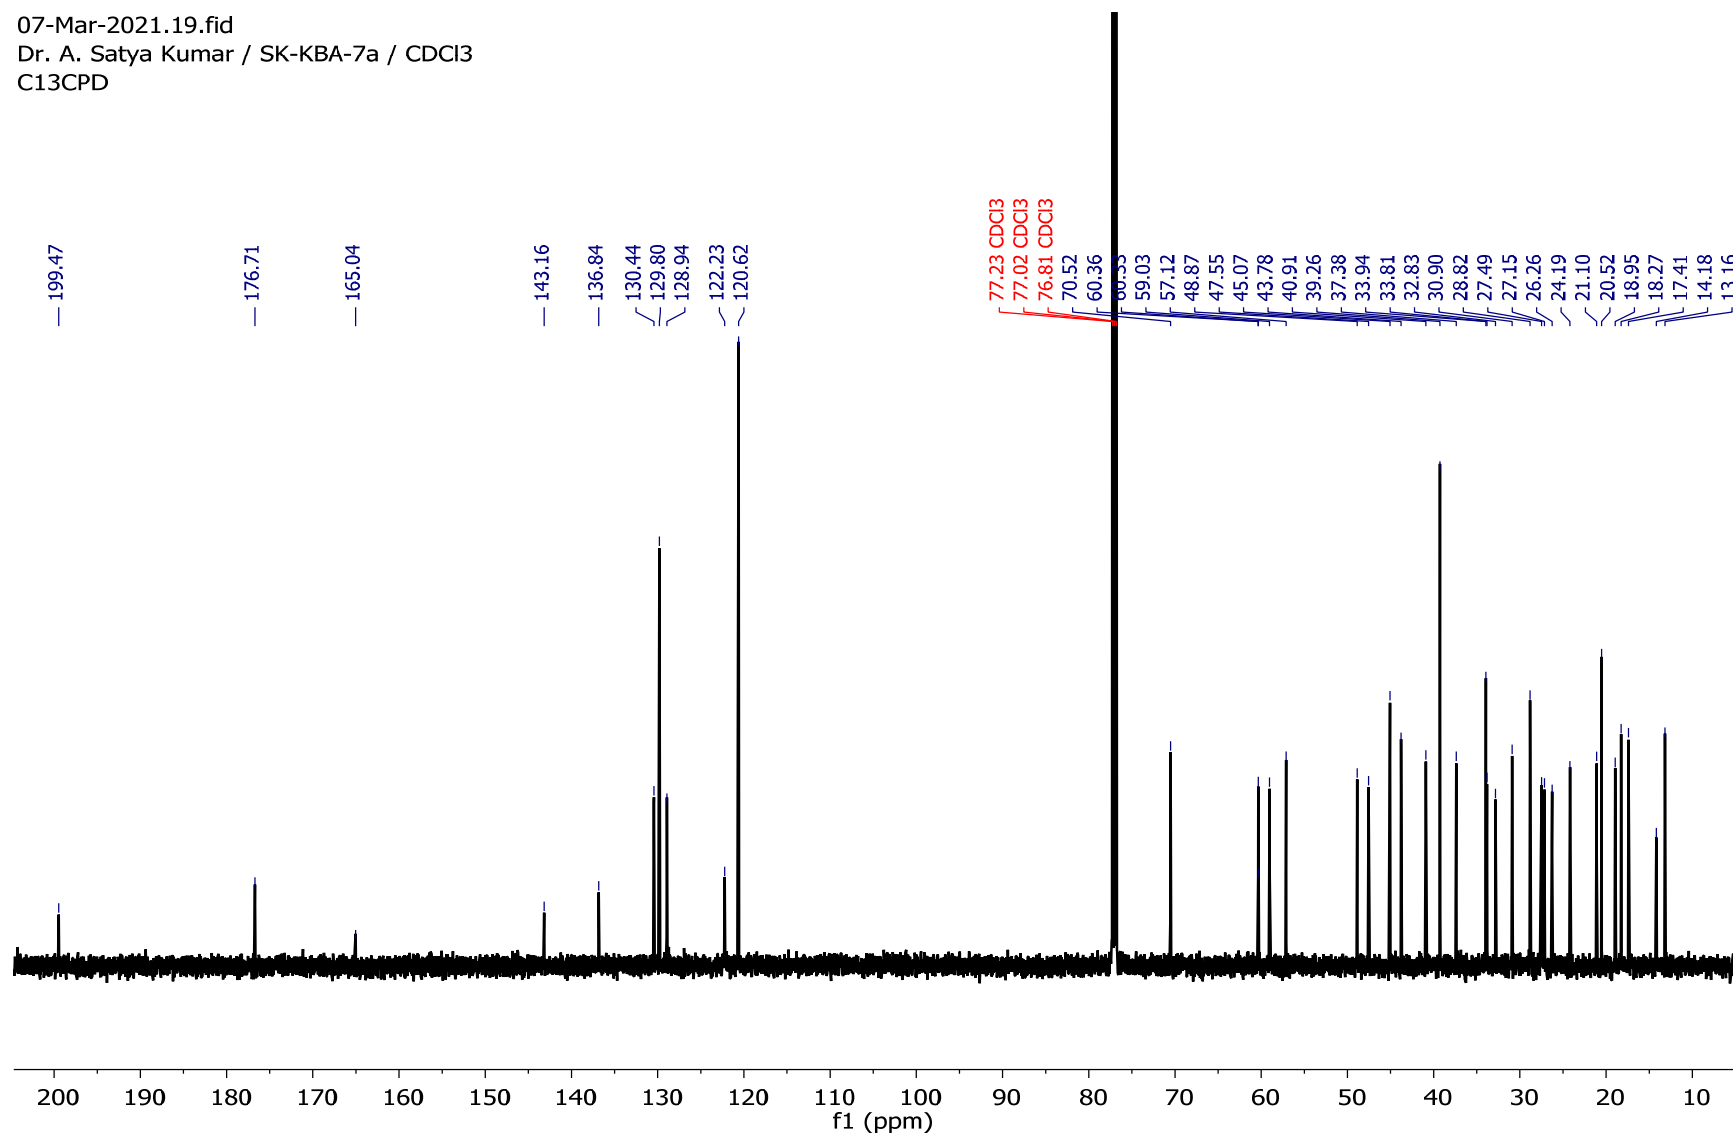

Figure S45: <sup>13</sup>C-NMR spectrum (150 MHz, CDCl<sub>3</sub>) of compound 7a

|             |                          |                        |         |                 |                       |
|-------------|--------------------------|------------------------|---------|-----------------|-----------------------|
| Sample Name | SK-KBA-7A                | Position               | Vial 41 | Instrument Name | Instrument 1          |
| User Name   |                          | Inj Vol                | 2       | InjPosition     |                       |
| Sample Type | Sample                   | IRM Calibration Status | Success | Data Filename   | SK-KBA-7A.d           |
| ACQ Method  | POSITIVE ION METHOD MS.m | Comment                | PARTHA  | Acquired Time   | 17-Mar-21 12:09:31 PM |

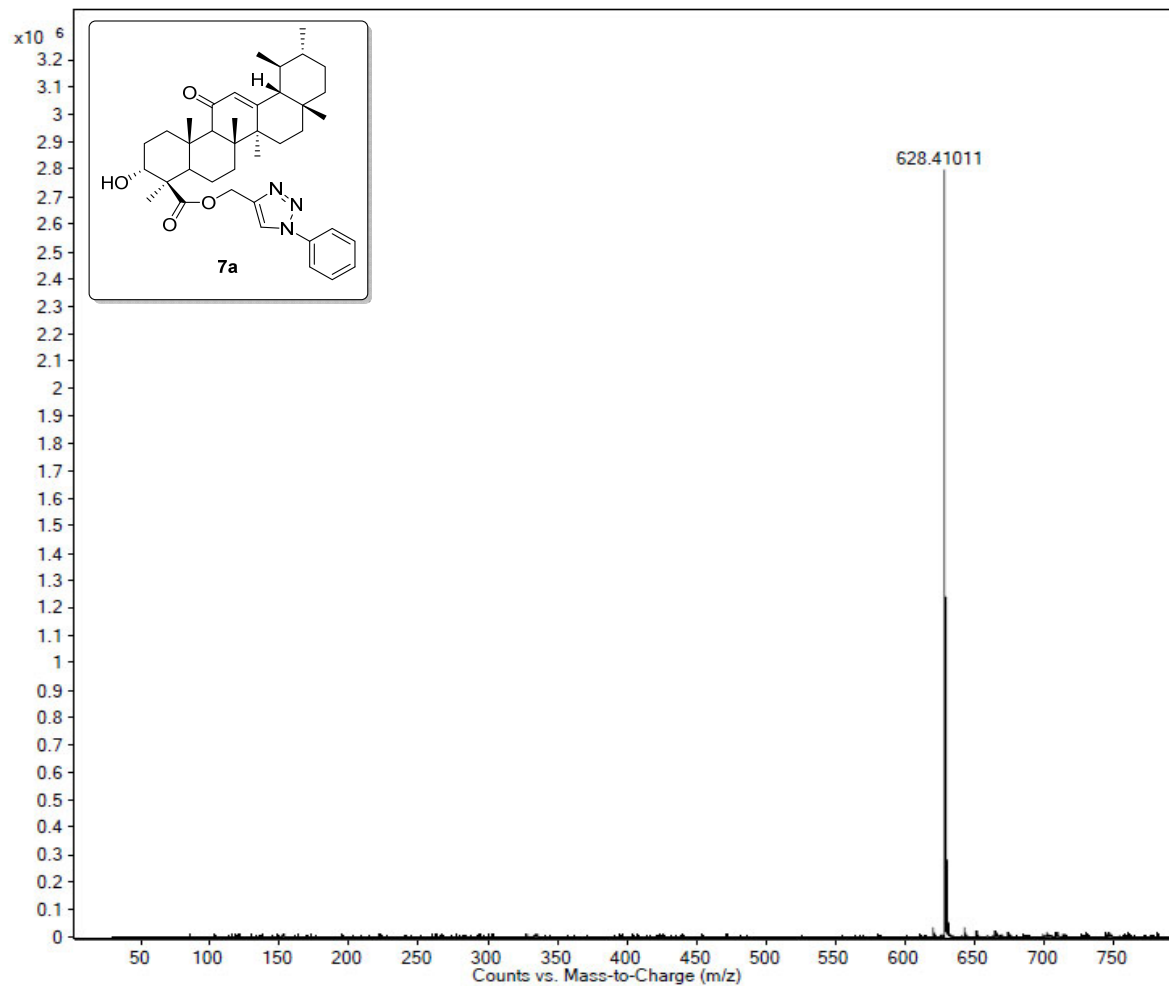

Figure S46: HRMS spectrum of compound 7a

07-Mar-2021.22.fid  
Dr. A. Satya Kumar / SK-KBA-7b / CDCl<sub>3</sub>  
PROTON

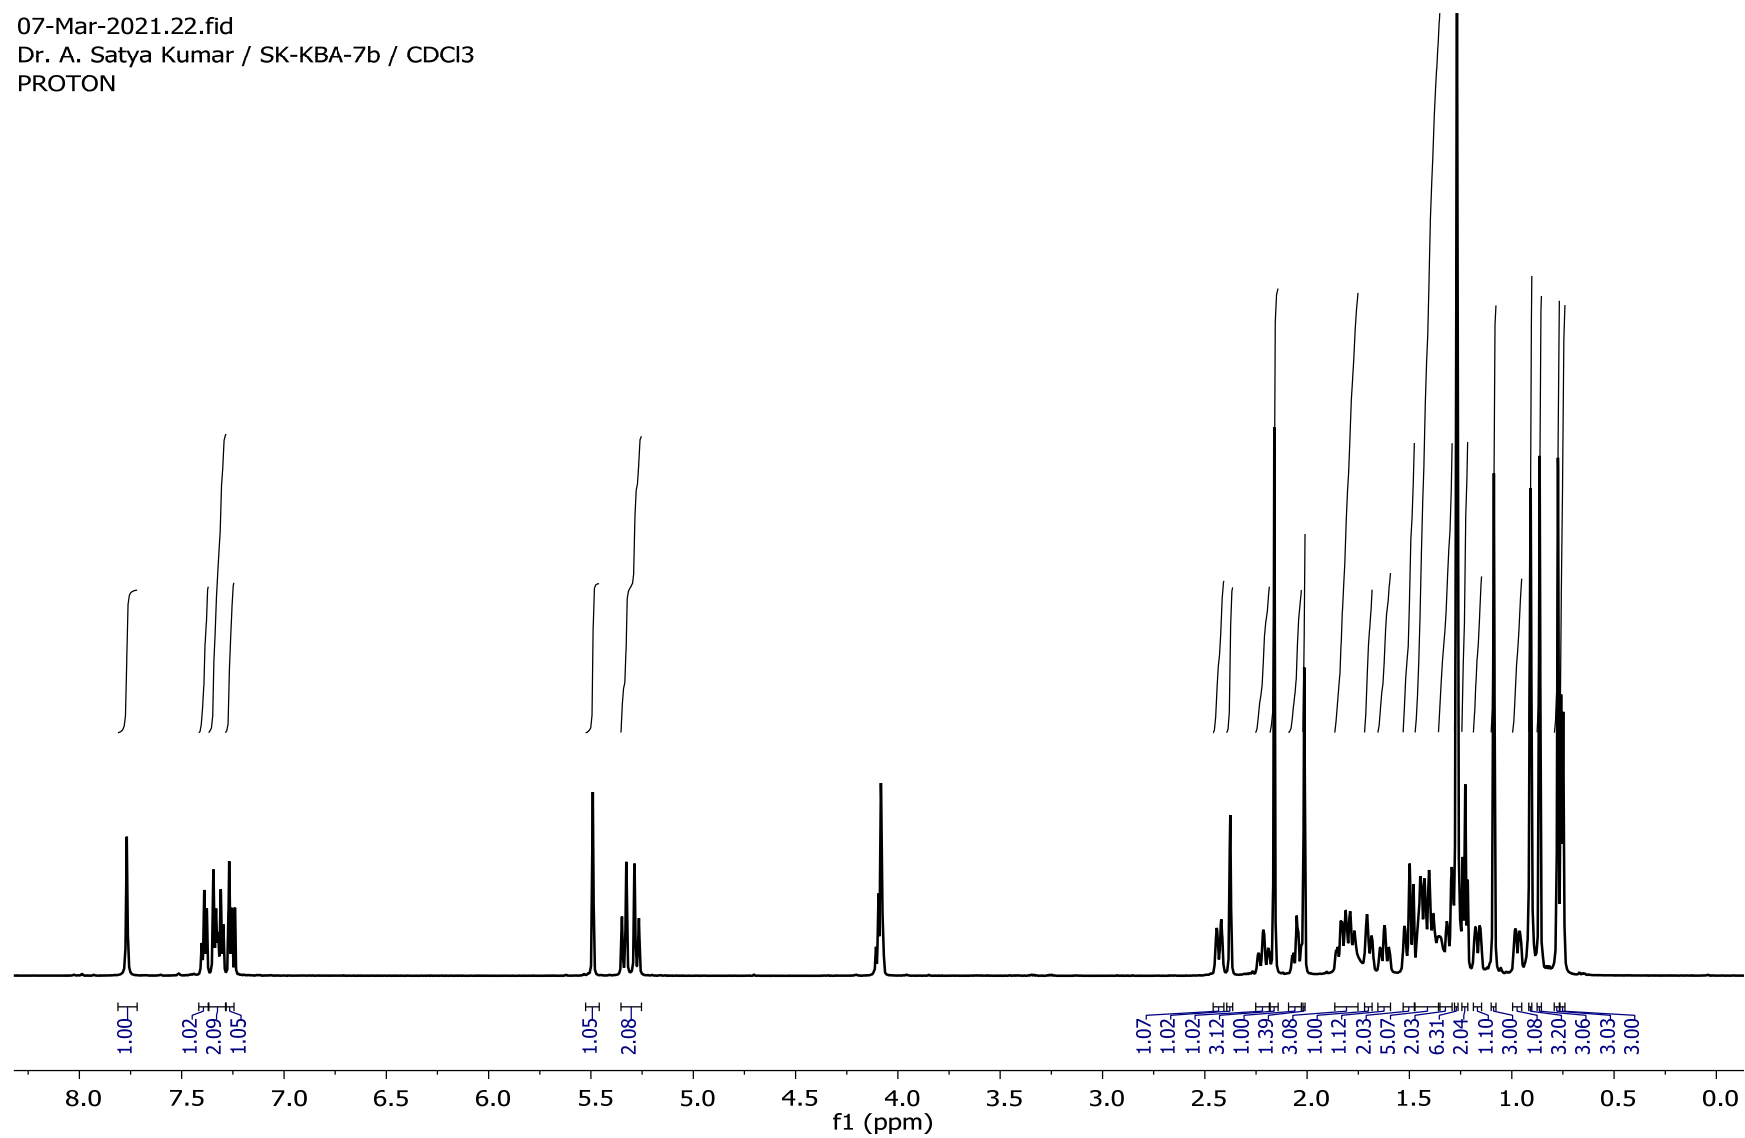

Figure S47: <sup>1</sup>H-NMR spectrum (600 MHz, CDCl<sub>3</sub>) of compound **7b**

07-Mar-2021.23.fid  
Dr. A. Satya Kumar / SK-KBA-7b / CDCl<sub>3</sub>  
C13CPD

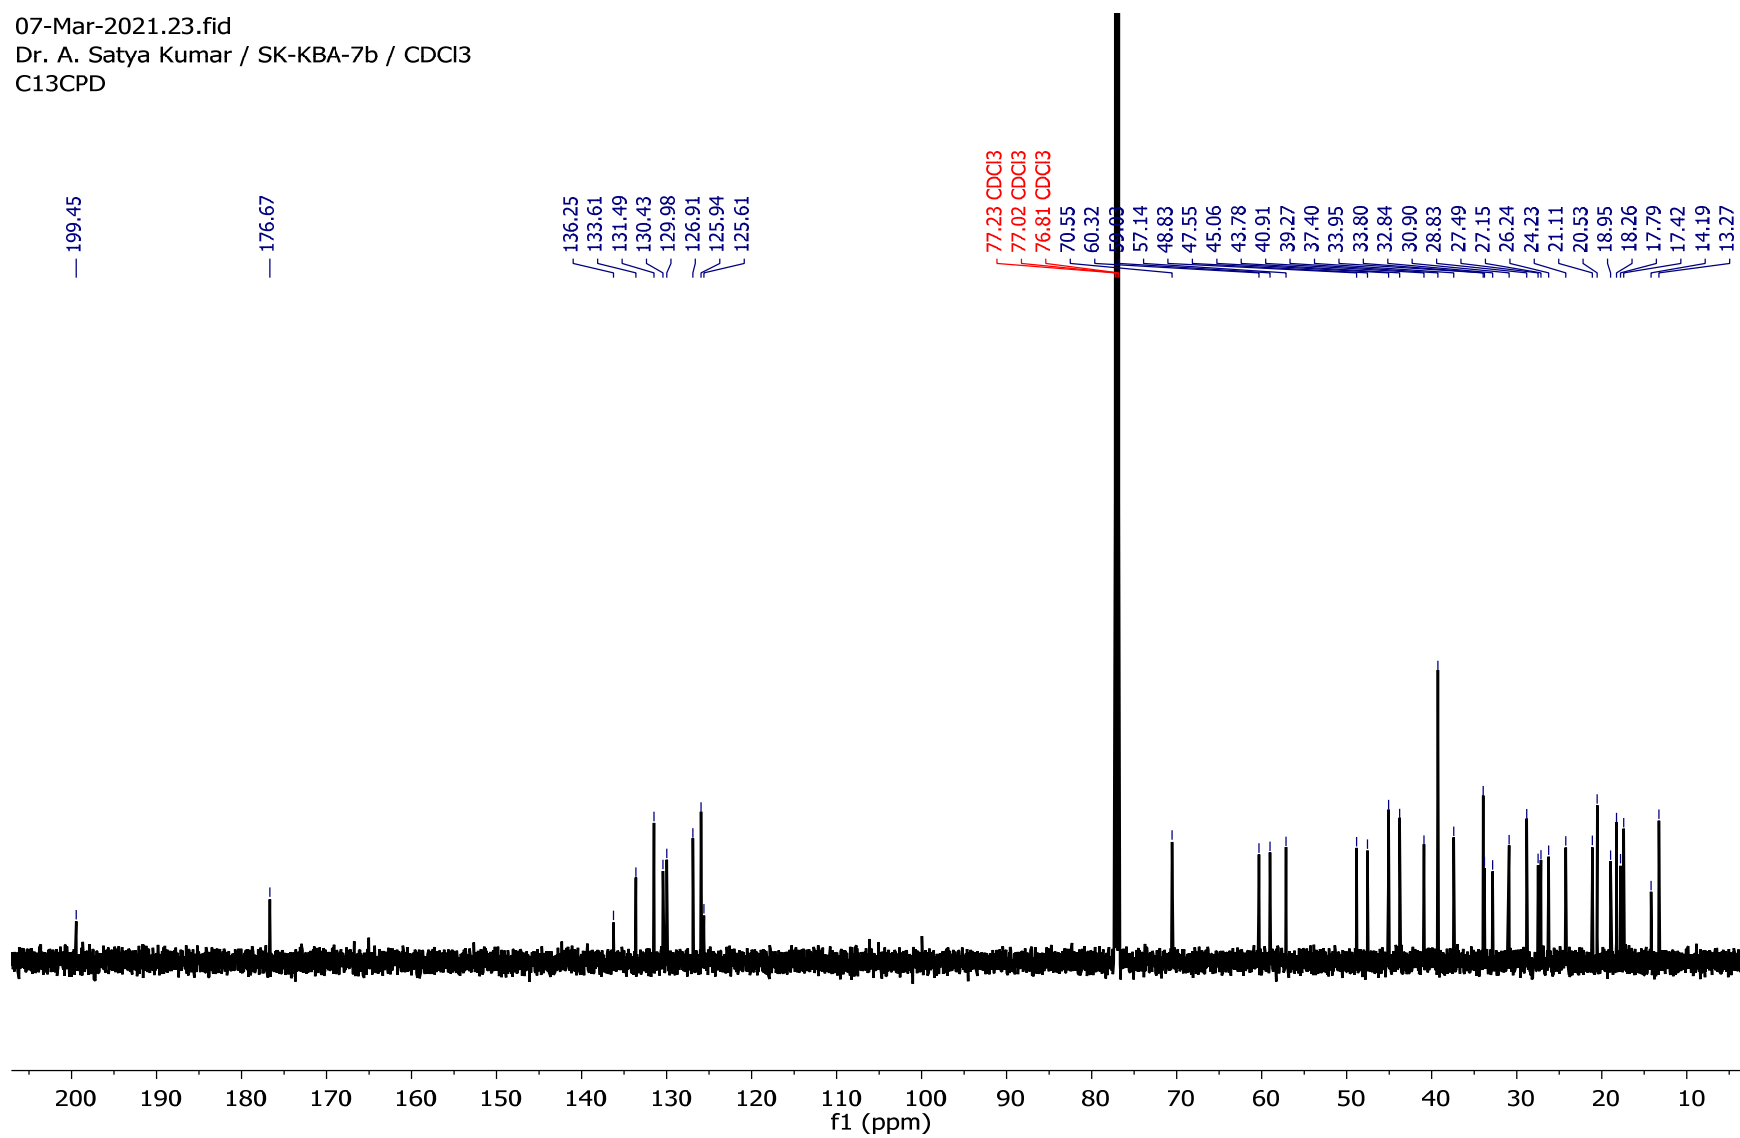

Figure S48: <sup>13</sup>C-NMR spectrum (150 MHz, CDCl<sub>3</sub>) of compound **7b**

|             |                          |                        |         |                 |                       |
|-------------|--------------------------|------------------------|---------|-----------------|-----------------------|
| Sample Name | SK-KBA-7B                | Position               | Vial 42 | Instrument Name | Instrument 1          |
| User Name   |                          | Inj Vol                | 2       | InjPosition     |                       |
| Sample Type | Sample                   | IRM Calibration Status | Success | Data Filename   | SK-KBA-7B.d           |
| ACQ Method  | POSITIVE ION METHOD MS.m | Comment                | PARTHA  | Acquired Time   | 17-Mar-21 12:18:56 PM |

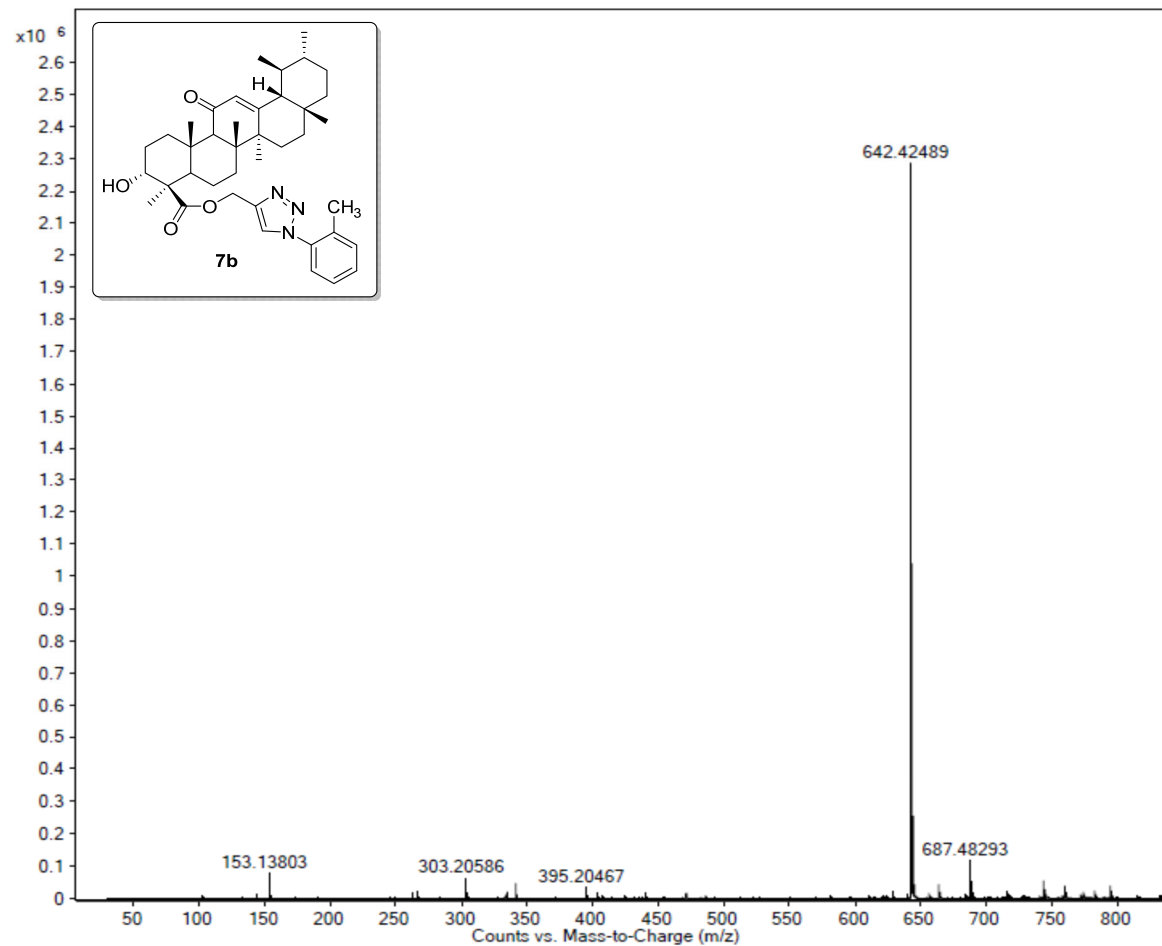

Figure S49: HRMS spectrum of compound **7b**

07-Mar-2021.26.fid  
Dr. A. Satya Kumar / SK-KBA-7c / CDCl<sub>3</sub>  
PROTON

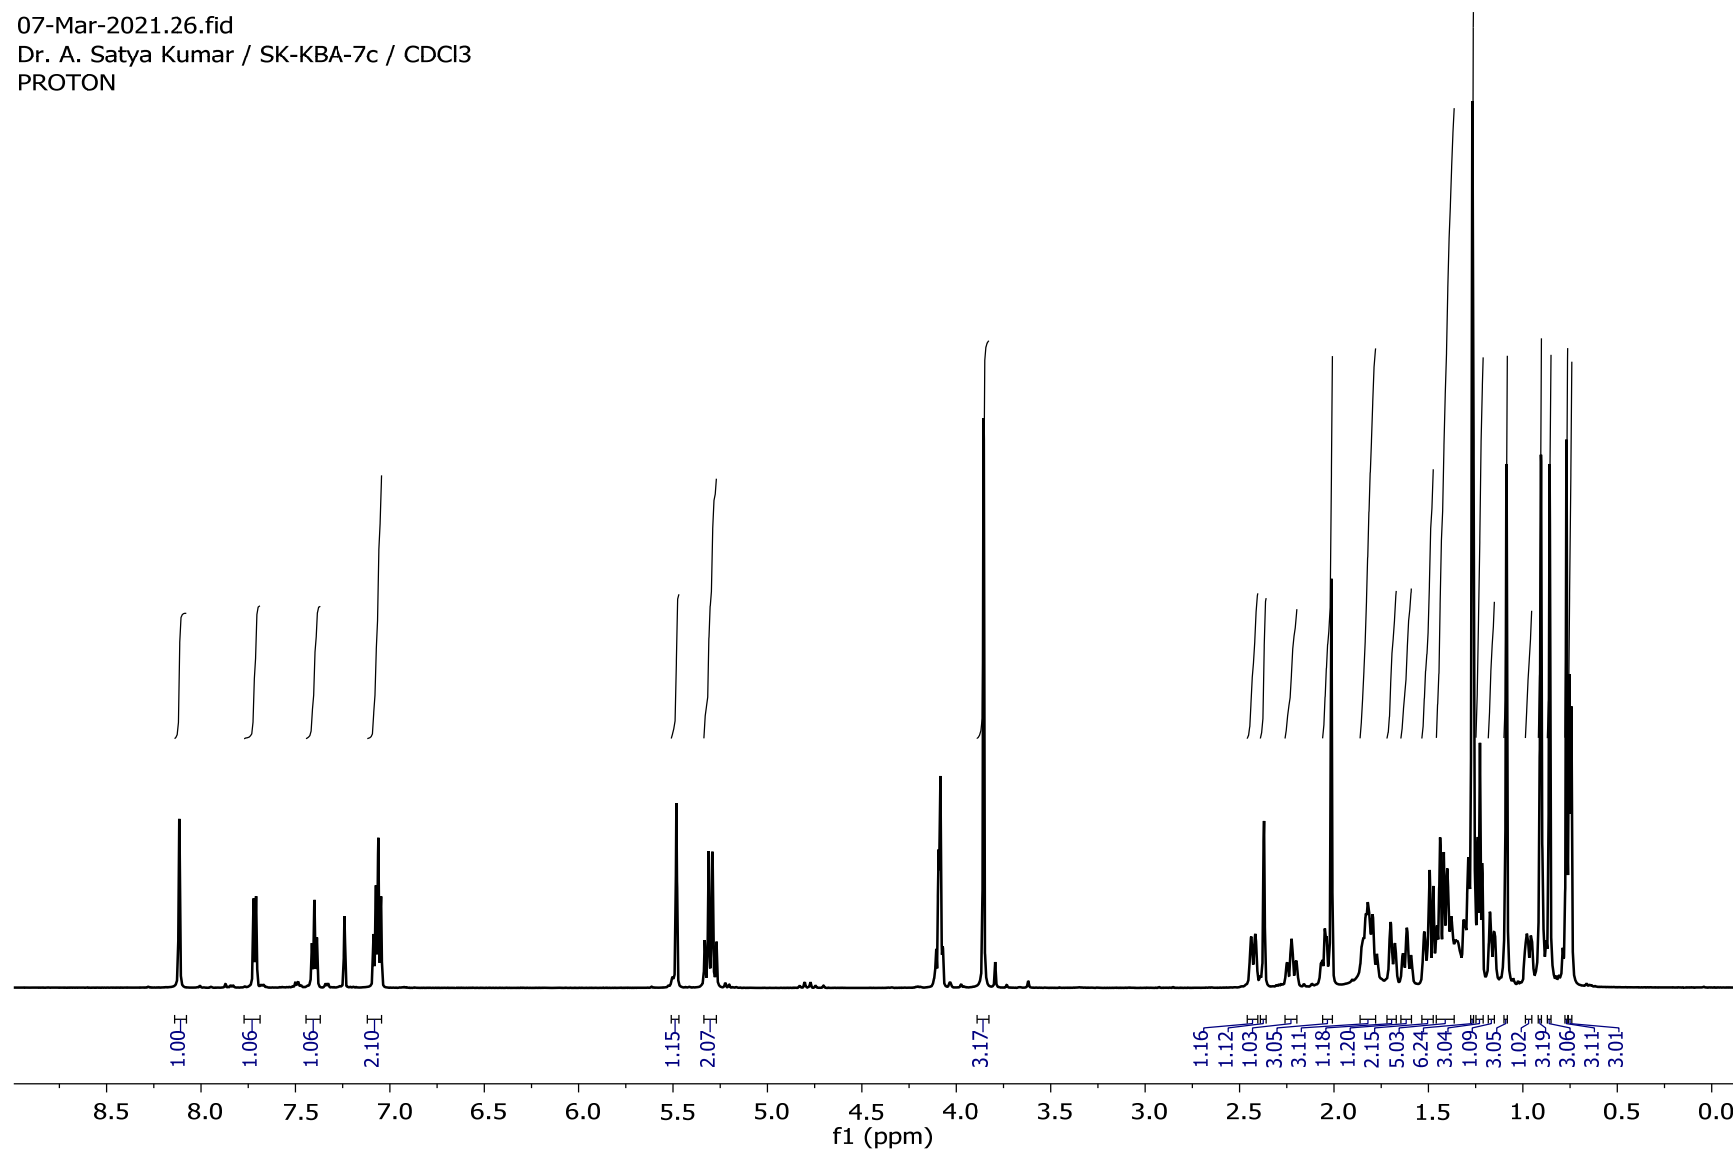

Figure S50: <sup>1</sup>H-NMR spectrum (600 MHz, CDCl<sub>3</sub>) of compound 7c

07-Mar-2021.27.fid  
Dr. A. Satya Kumar / SK-KBA-7c / CDCl<sub>3</sub>  
C13CPD

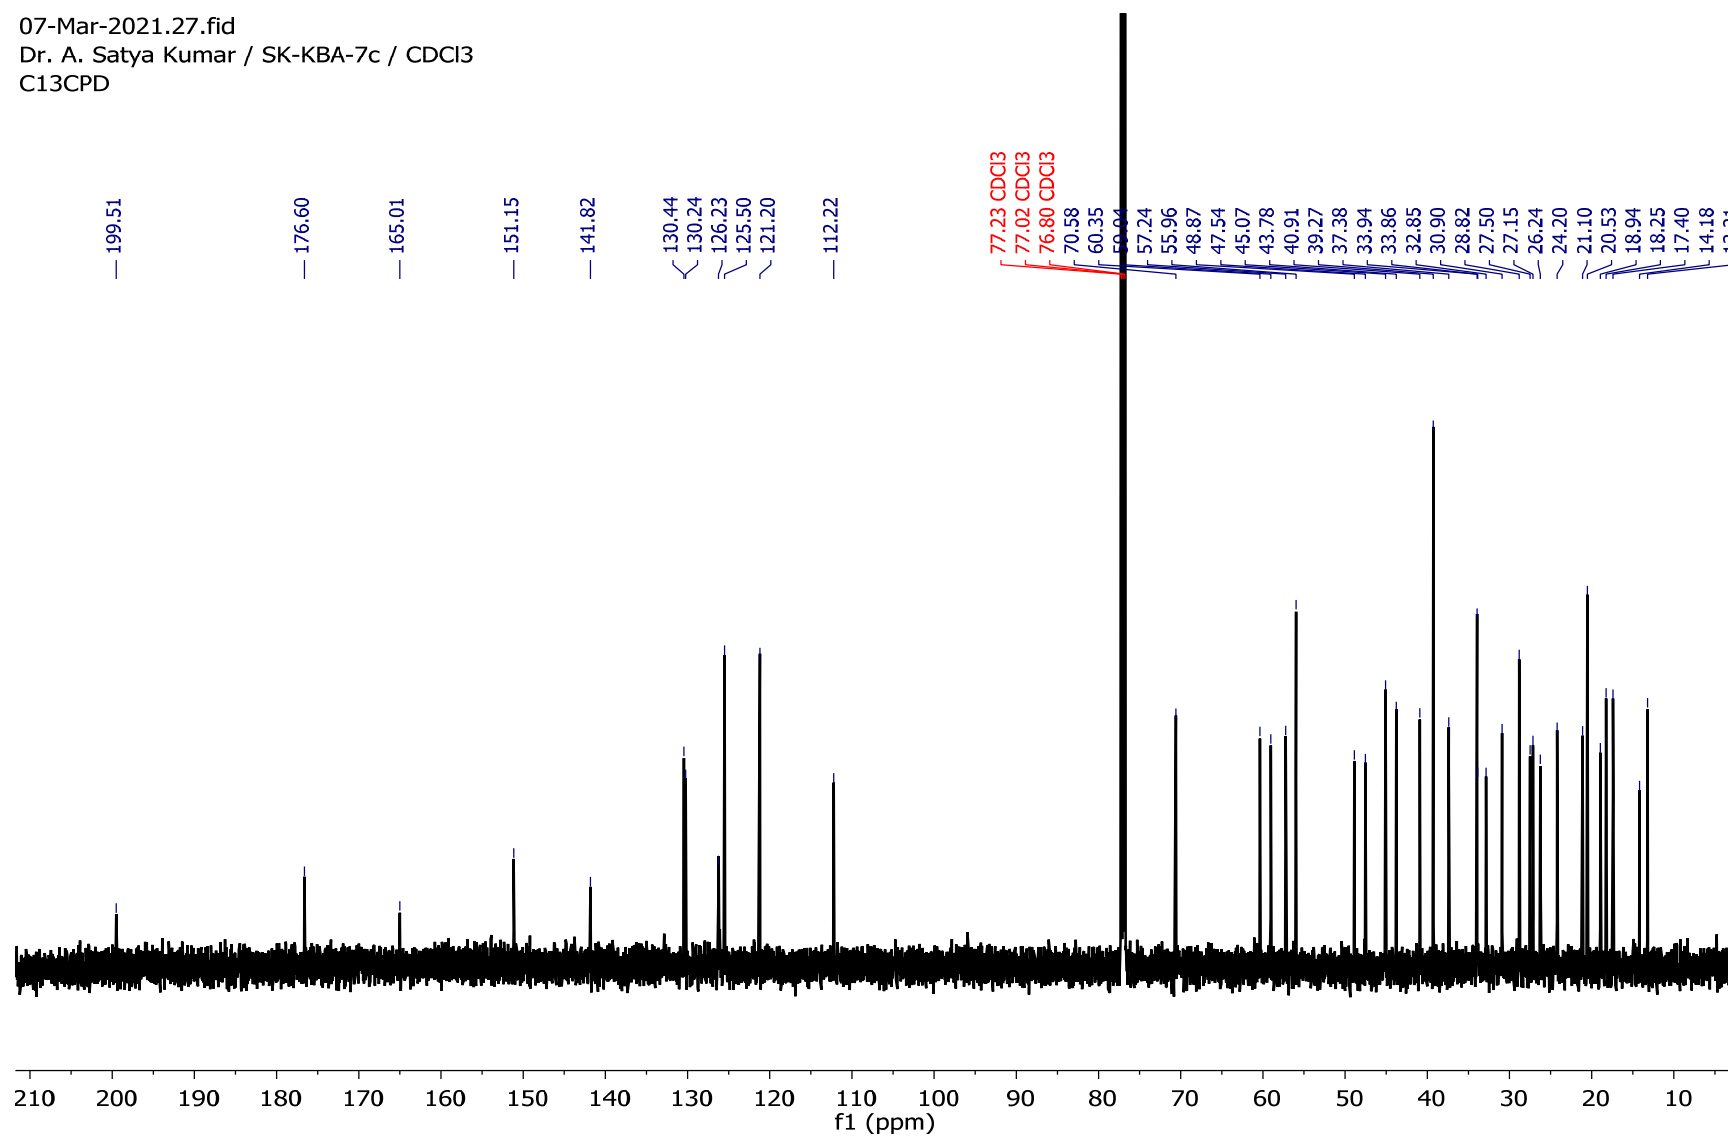

Figure S51: <sup>13</sup>C-NMR spectrum (150 MHz, CDCl<sub>3</sub>) of compound 7c



|             |                          |                        |         |                 |                       |
|-------------|--------------------------|------------------------|---------|-----------------|-----------------------|
| Sample Name | SK-KBA-7C                | Position               | Vial 43 | Instrument Name | Instrument 1          |
| User Name   |                          | Inj Vol                | 2       | InjPosition     |                       |
| Sample Type | Sample                   | IRM Calibration Status | Success | Data Filename   | SK-KBA-7C.d           |
| ACQ Method  | POSITIVE ION METHOD MS.m | Comment                | PARTHA  | Acquired Time   | 17-Mar-21 12:24:32 PM |

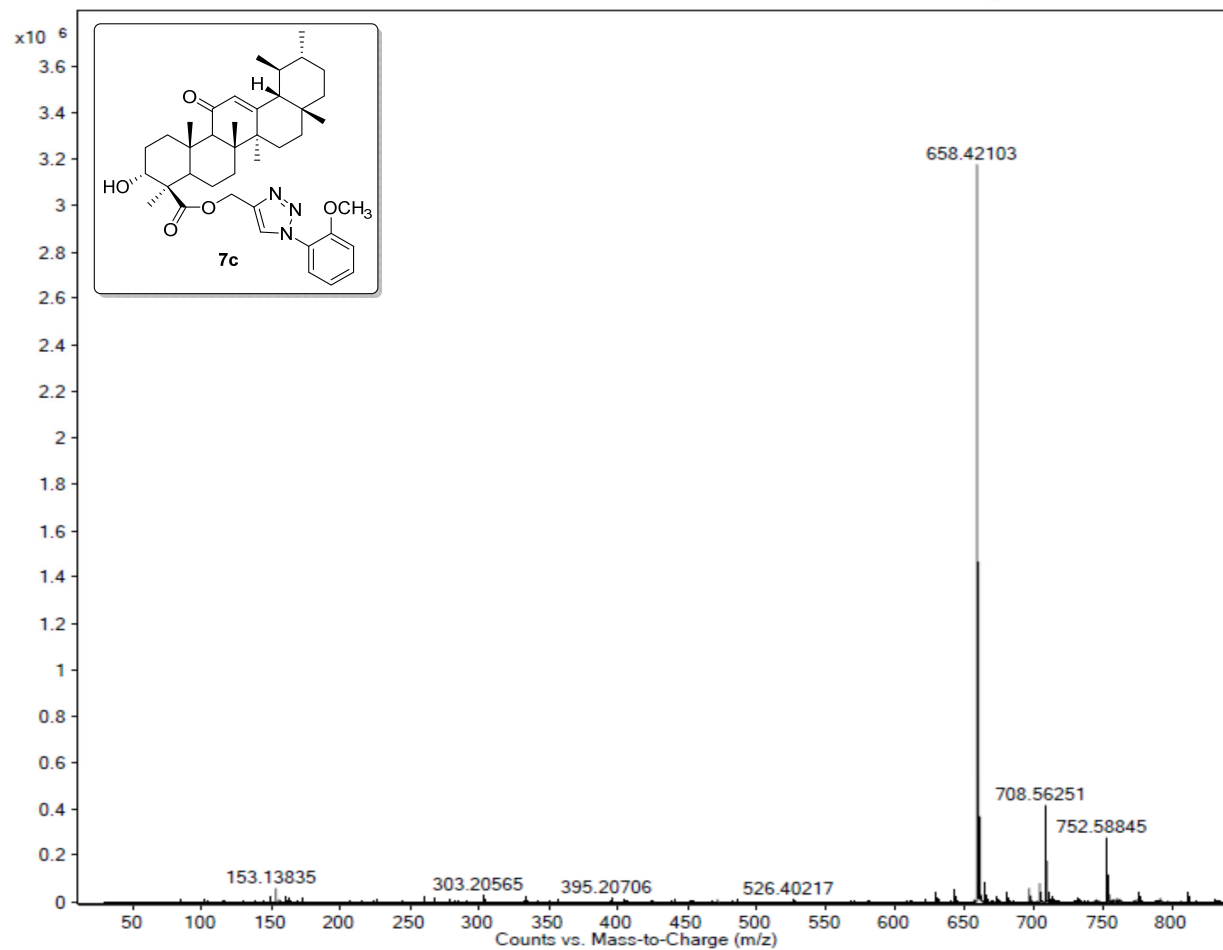

Figure S52: HRMS spectrum of compound 7c

08-Mar-2021.1.fid  
Dr. A. Satya Kumar / SK-KBA-7d / CDCl<sub>3</sub>  
PROTON

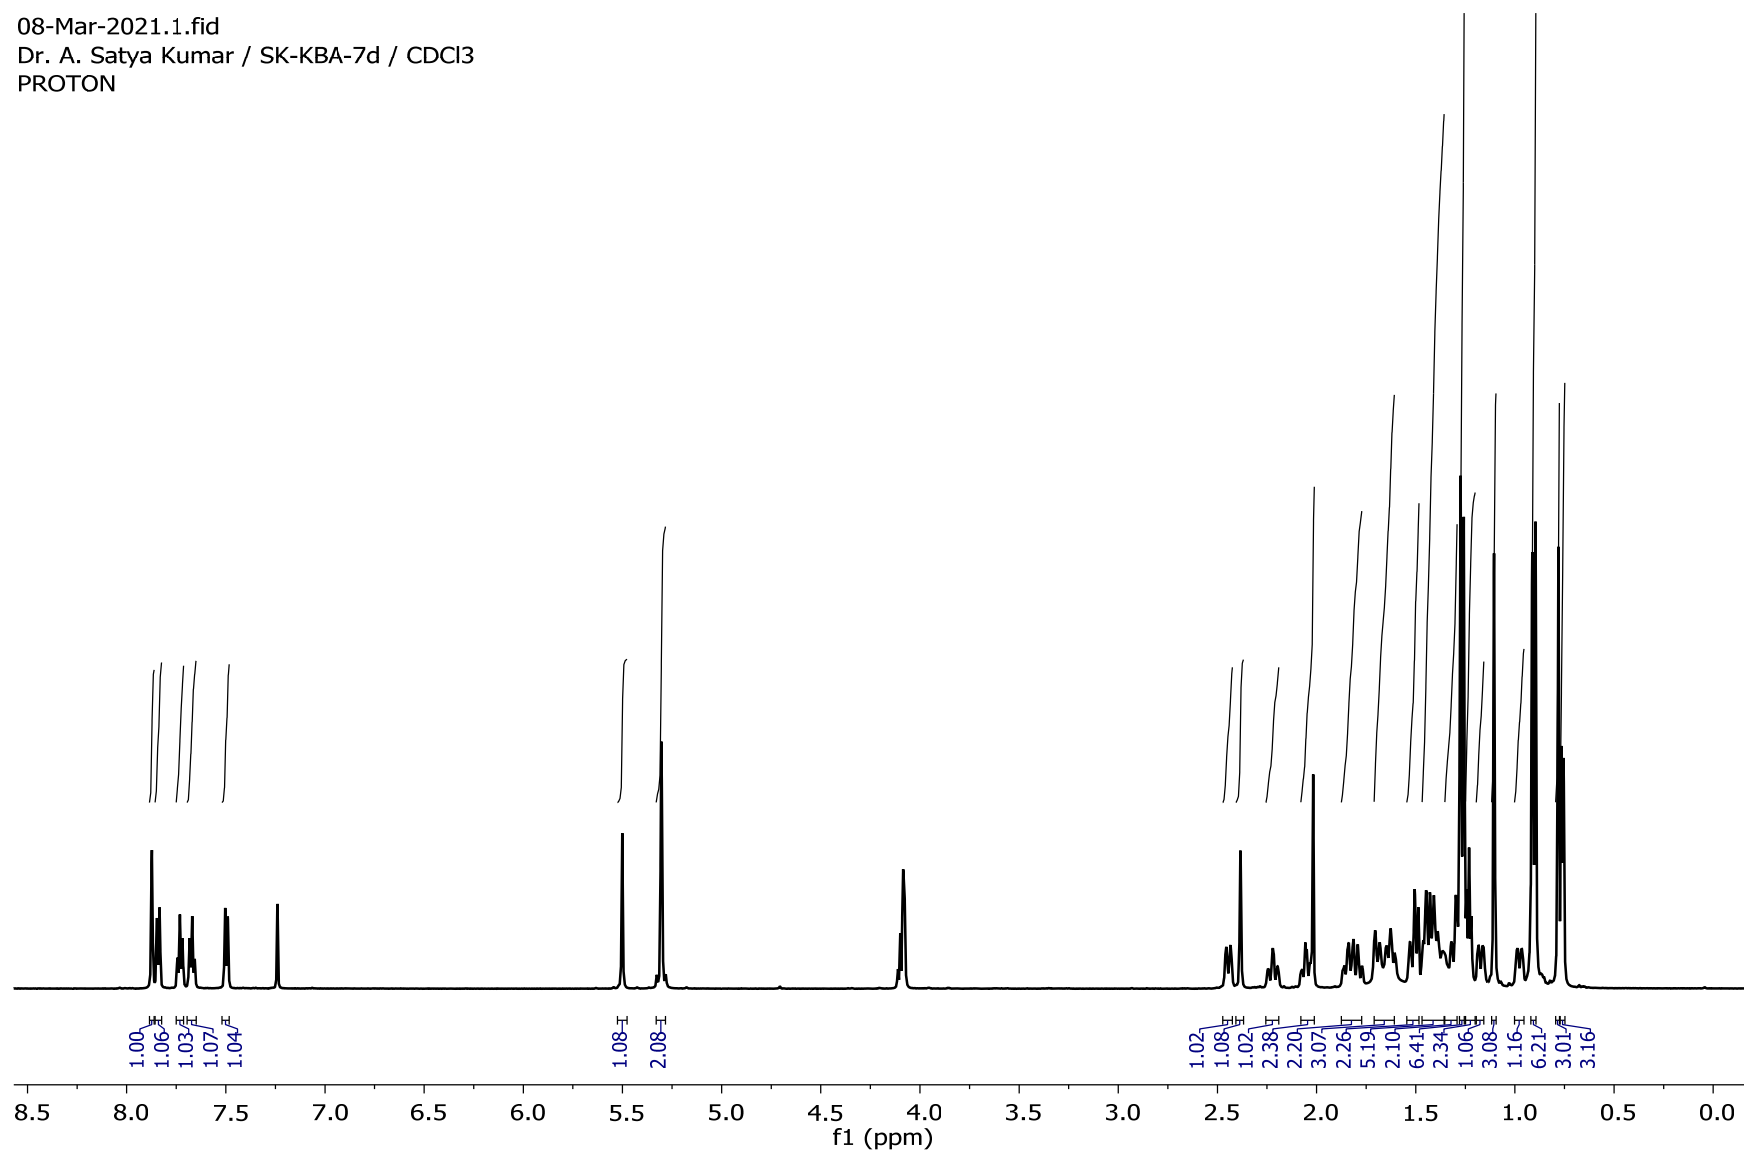

Figure S53: <sup>1</sup>H-NMR spectrum (600 MHz, CDCl<sub>3</sub>) of compound 7d

08-Mar-2021.2.fid  
Dr. A. Satya Kumar / SK-KBA-7d / CDCl<sub>3</sub>  
C13CPD

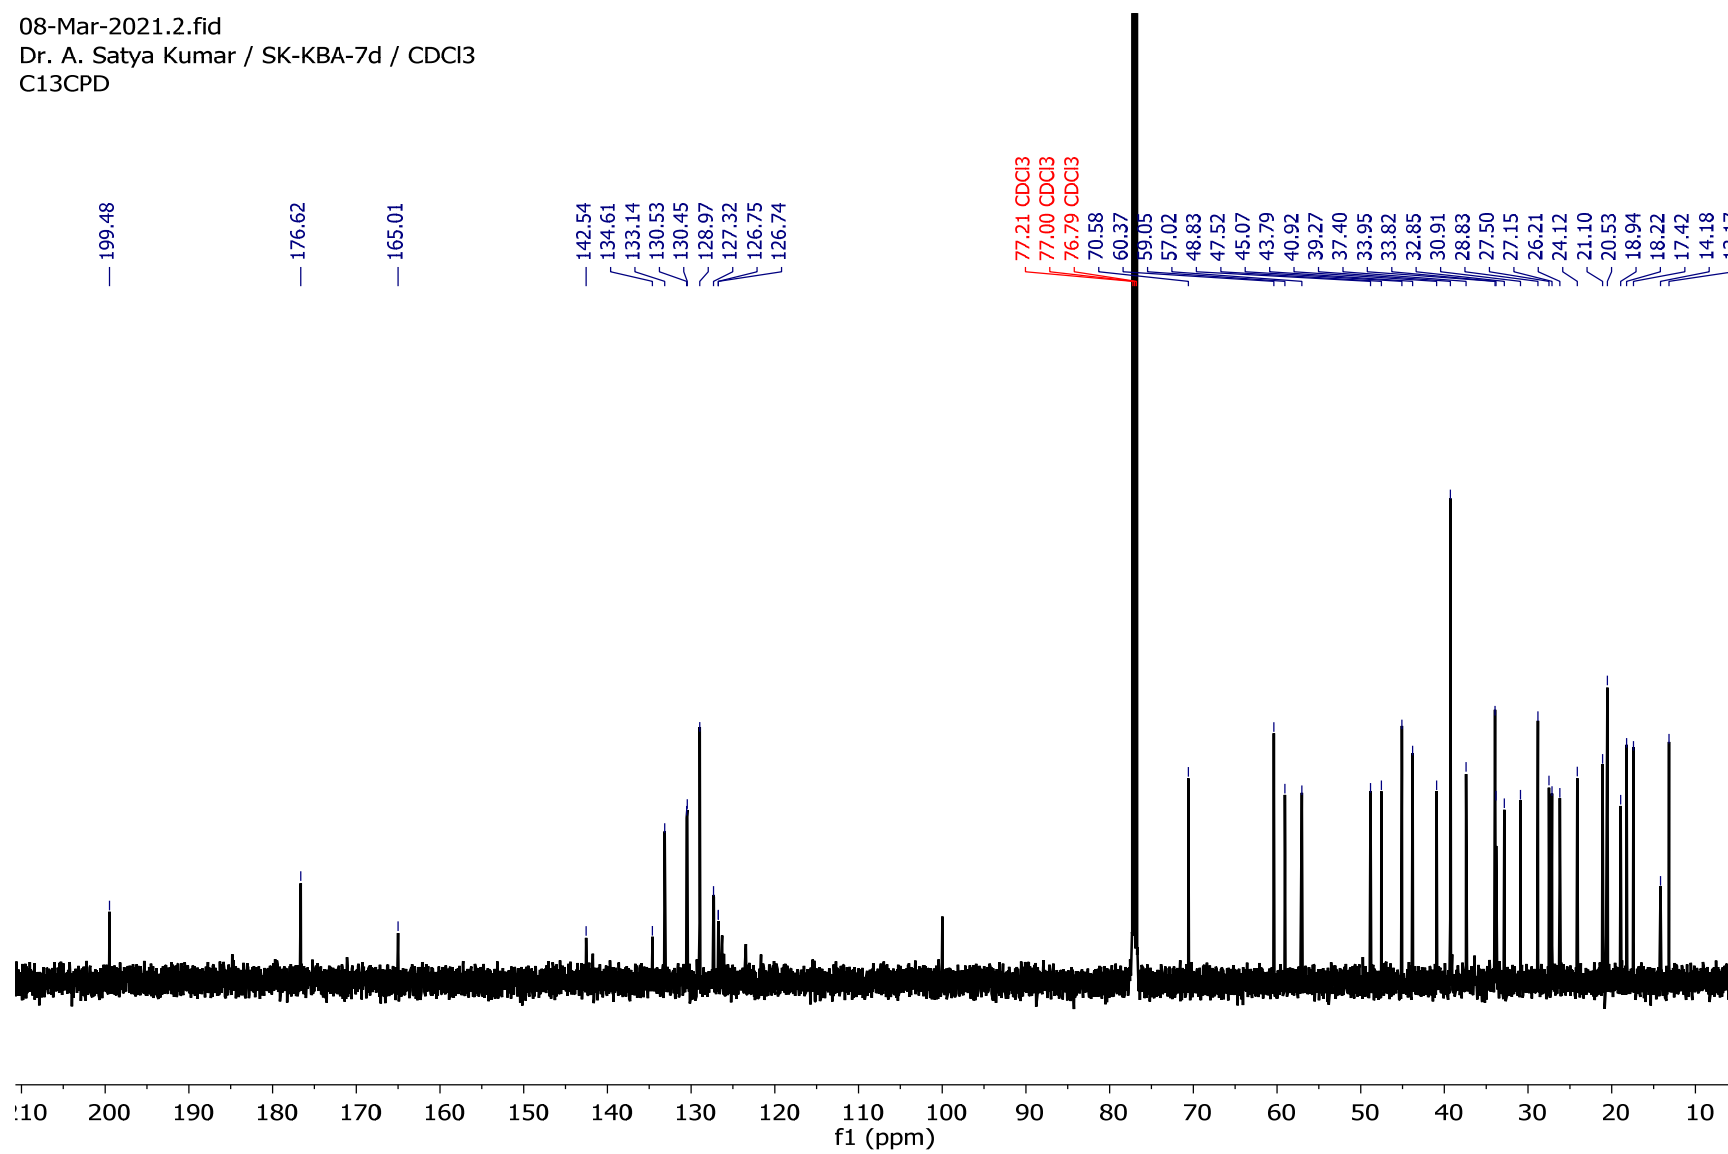

Figure S54: <sup>13</sup>C-NMR spectrum (150 MHz, CDCl<sub>3</sub>) of compound 7d

08-Mar-2021.5.fid  
Dr. A. Satya Kumar / SK-KBA-7d / CDCl<sub>3</sub>  
F19CPD

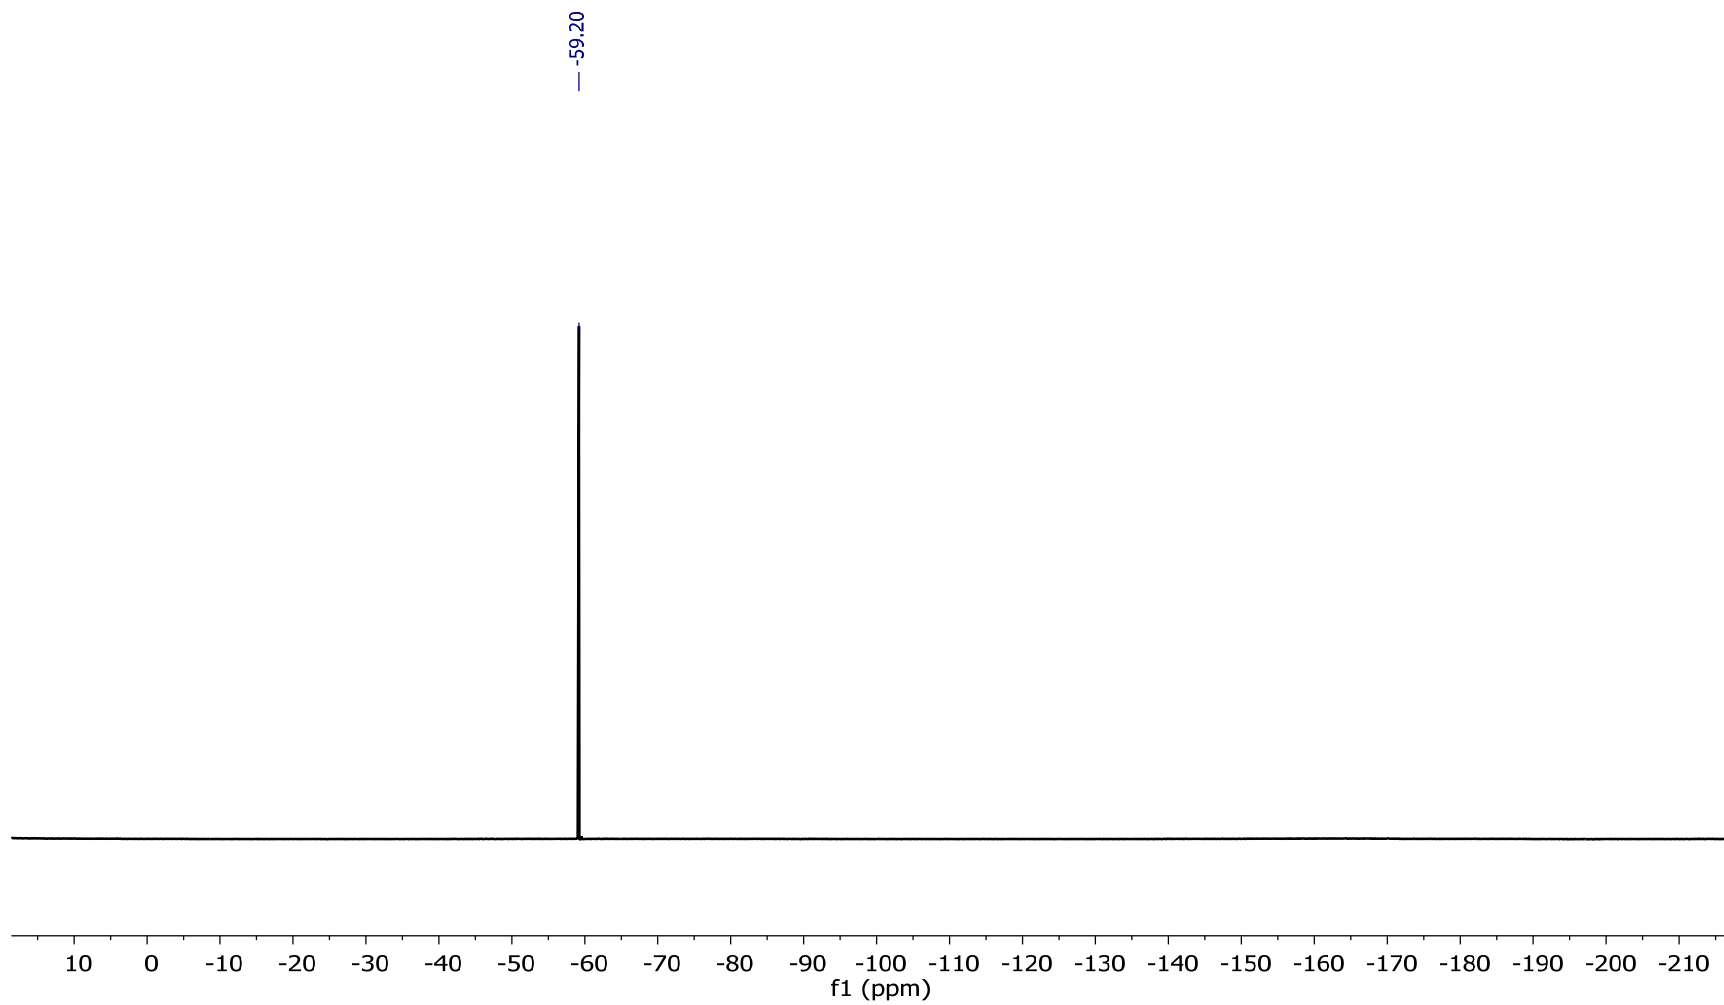

Figure S55: <sup>19</sup>F-NMR spectrum (564 MHz, CDCl<sub>3</sub>) of compound **7d**

|             |                          |                        |         |                 |                       |
|-------------|--------------------------|------------------------|---------|-----------------|-----------------------|
| Sample Name | SK-KBA-7D                | Position               | Vial 44 | Instrument Name | Instrument 1          |
| User Name   |                          | Inj Vol                | 2       | InjPosition     |                       |
| Sample Type | Sample                   | IRM Calibration Status | Success | Data Filename   | SK-KBA-7D.d           |
| ACQ Method  | POSITIVE ION METHOD MS.m | Comment                | PARTHA  | Acquired Time   | 17-Mar-21 12:30:19 PM |

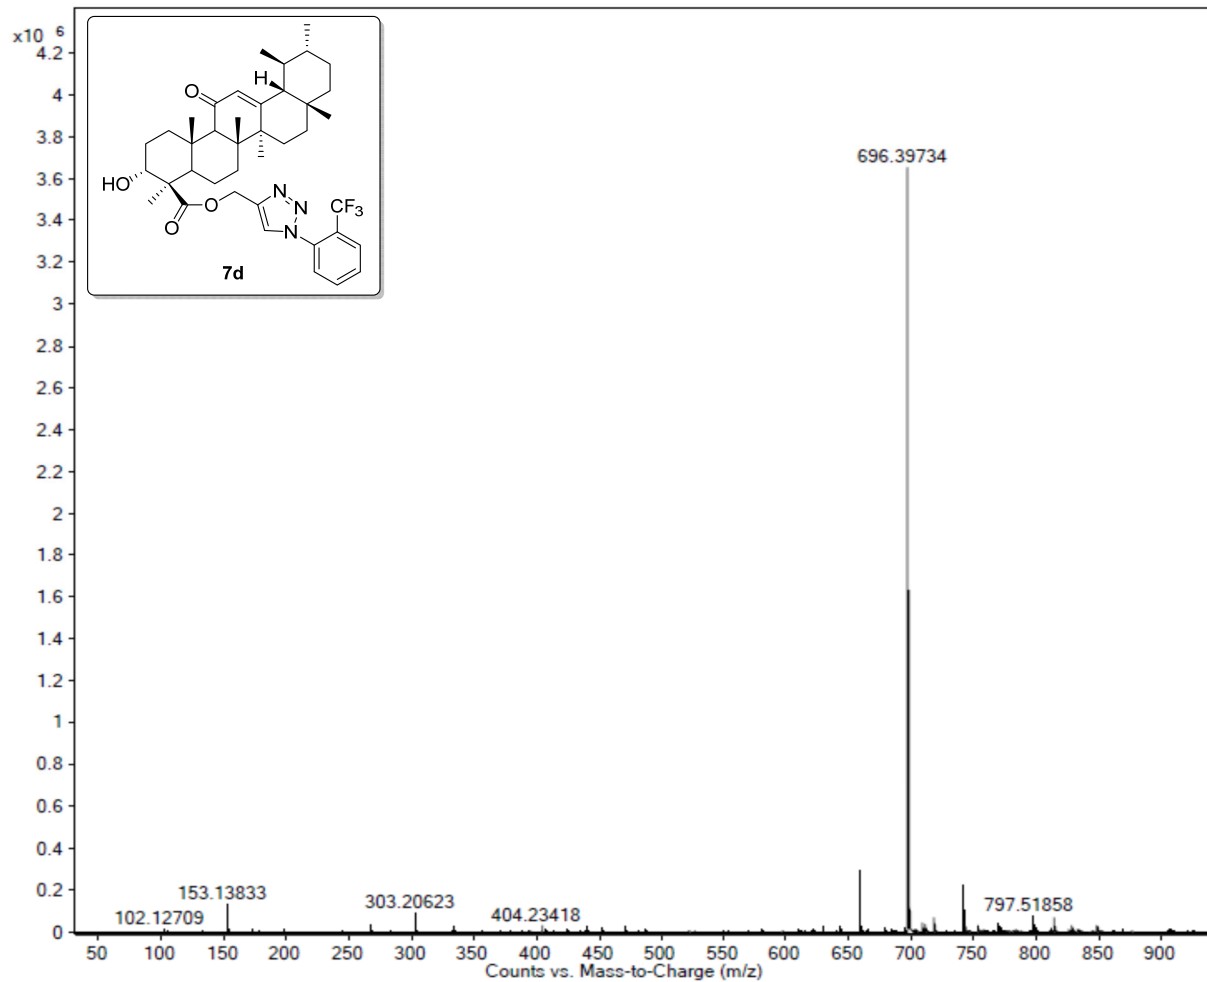

Figure S56: HRMS spectrum of compound 7d

08-Mar-2021.6.fid  
Dr. A. Satya Kumar / SK-KBA-7e / CDCl<sub>3</sub>  
PROTON

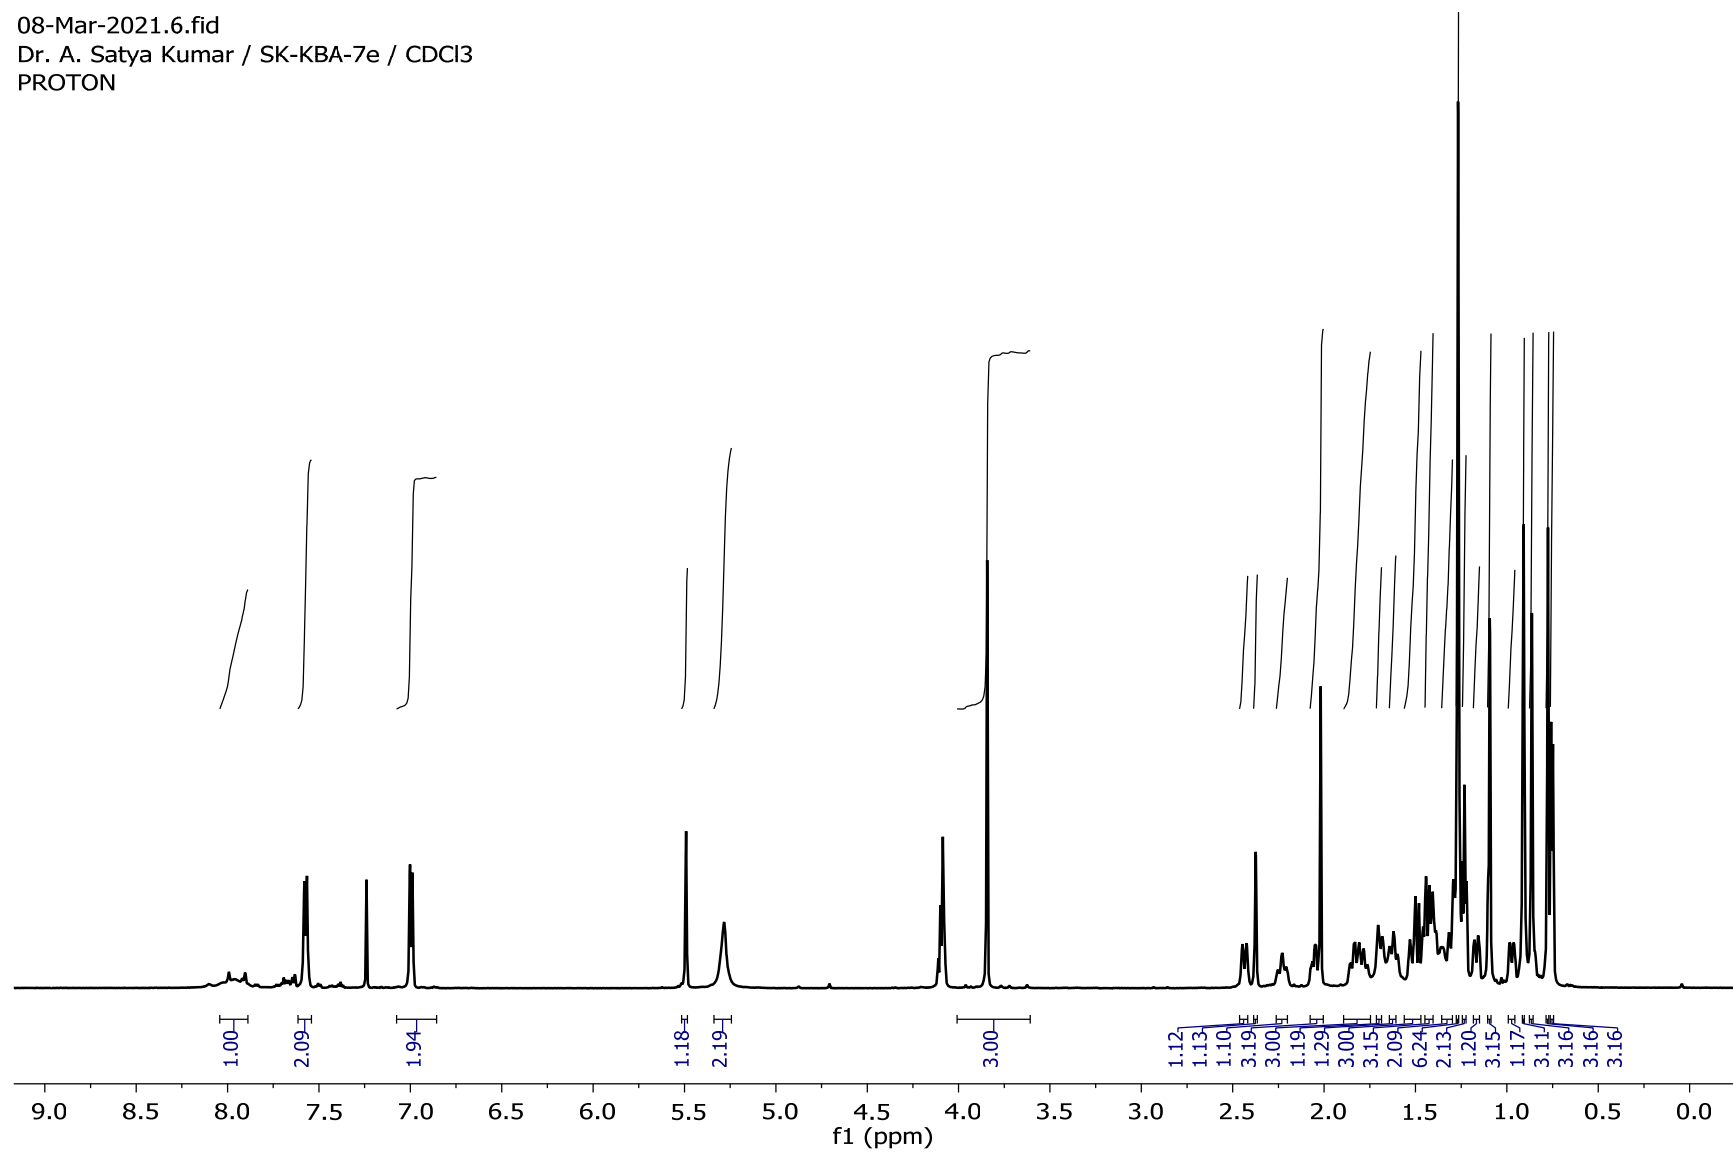

Figure S57: <sup>1</sup>H-NMR spectrum (600 MHz, CDCl<sub>3</sub>) of compound 7e

08-Mar-2021.7.fid  
Dr. A. Satya Kumar / SK-KBA-7e / CDCl<sub>3</sub>  
C13CPD

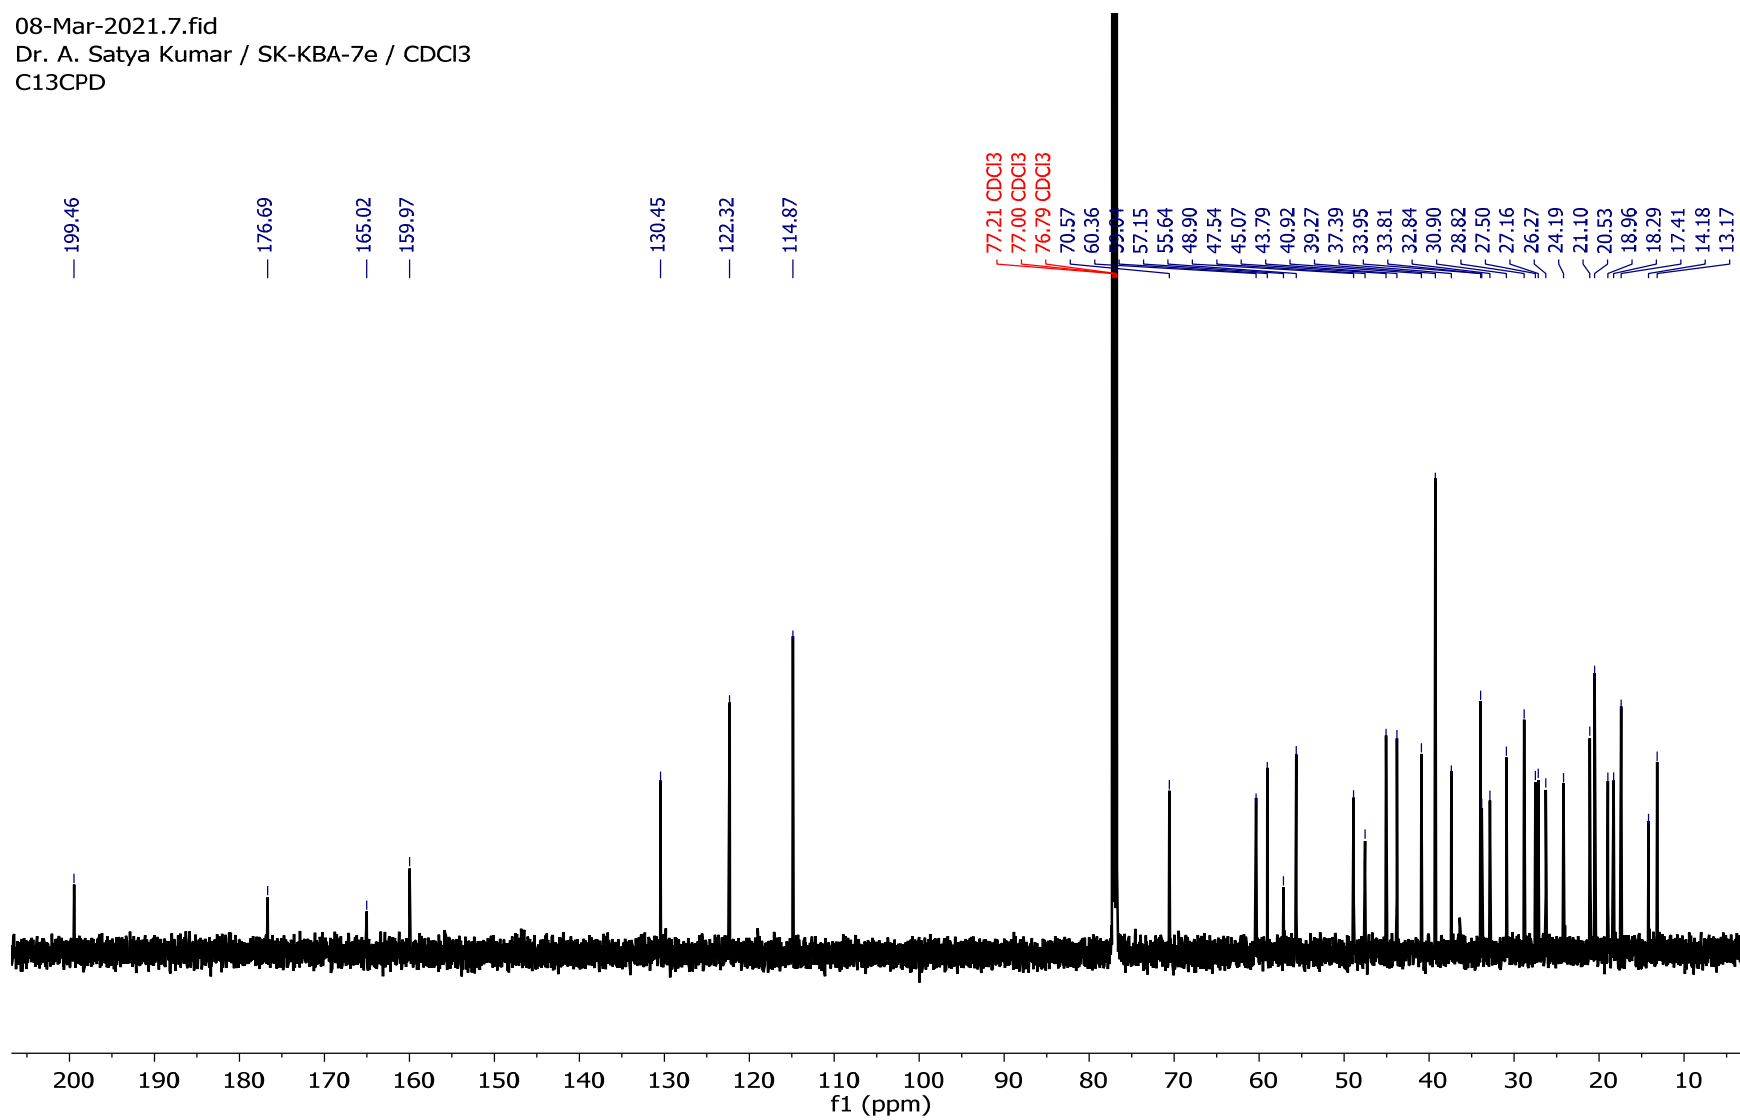

Figure S58: <sup>13</sup>C-NMR spectrum (150 MHz, CDCl<sub>3</sub>) of compound 7e

|             |                          |                        |         |                 |                       |
|-------------|--------------------------|------------------------|---------|-----------------|-----------------------|
| Sample Name | SK-KBA-7E                | Position               | Vial 45 | Instrument Name | Instrument 1          |
| User Name   |                          | Inj Vol                | 2       | InjPosition     |                       |
| Sample Type | Sample                   | IRM Calibration Status | Success | Data Filename   | SK-KBA-7E.d           |
| ACQ Method  | POSITIVE ION METHOD MS.m | Comment                | PARTHA  | Acquired Time   | 17-Mar-21 12:36:03 PM |

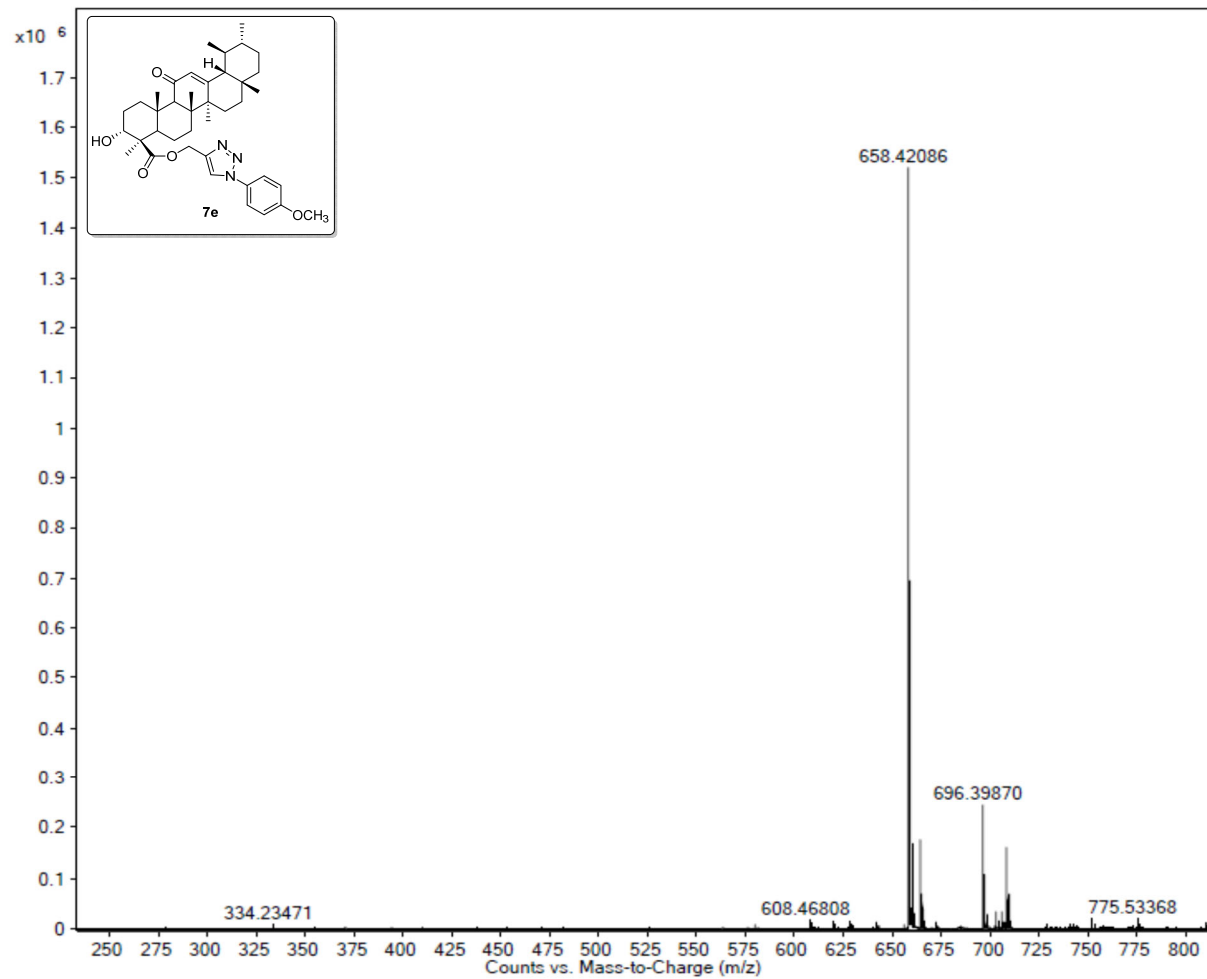

Figure S59: HRMS spectrum of compound **7e**



08-Mar-2021.10.fid  
Dr. A. Satya Kumar / SK-KBA-7f / CDCl<sub>3</sub>  
PROTON

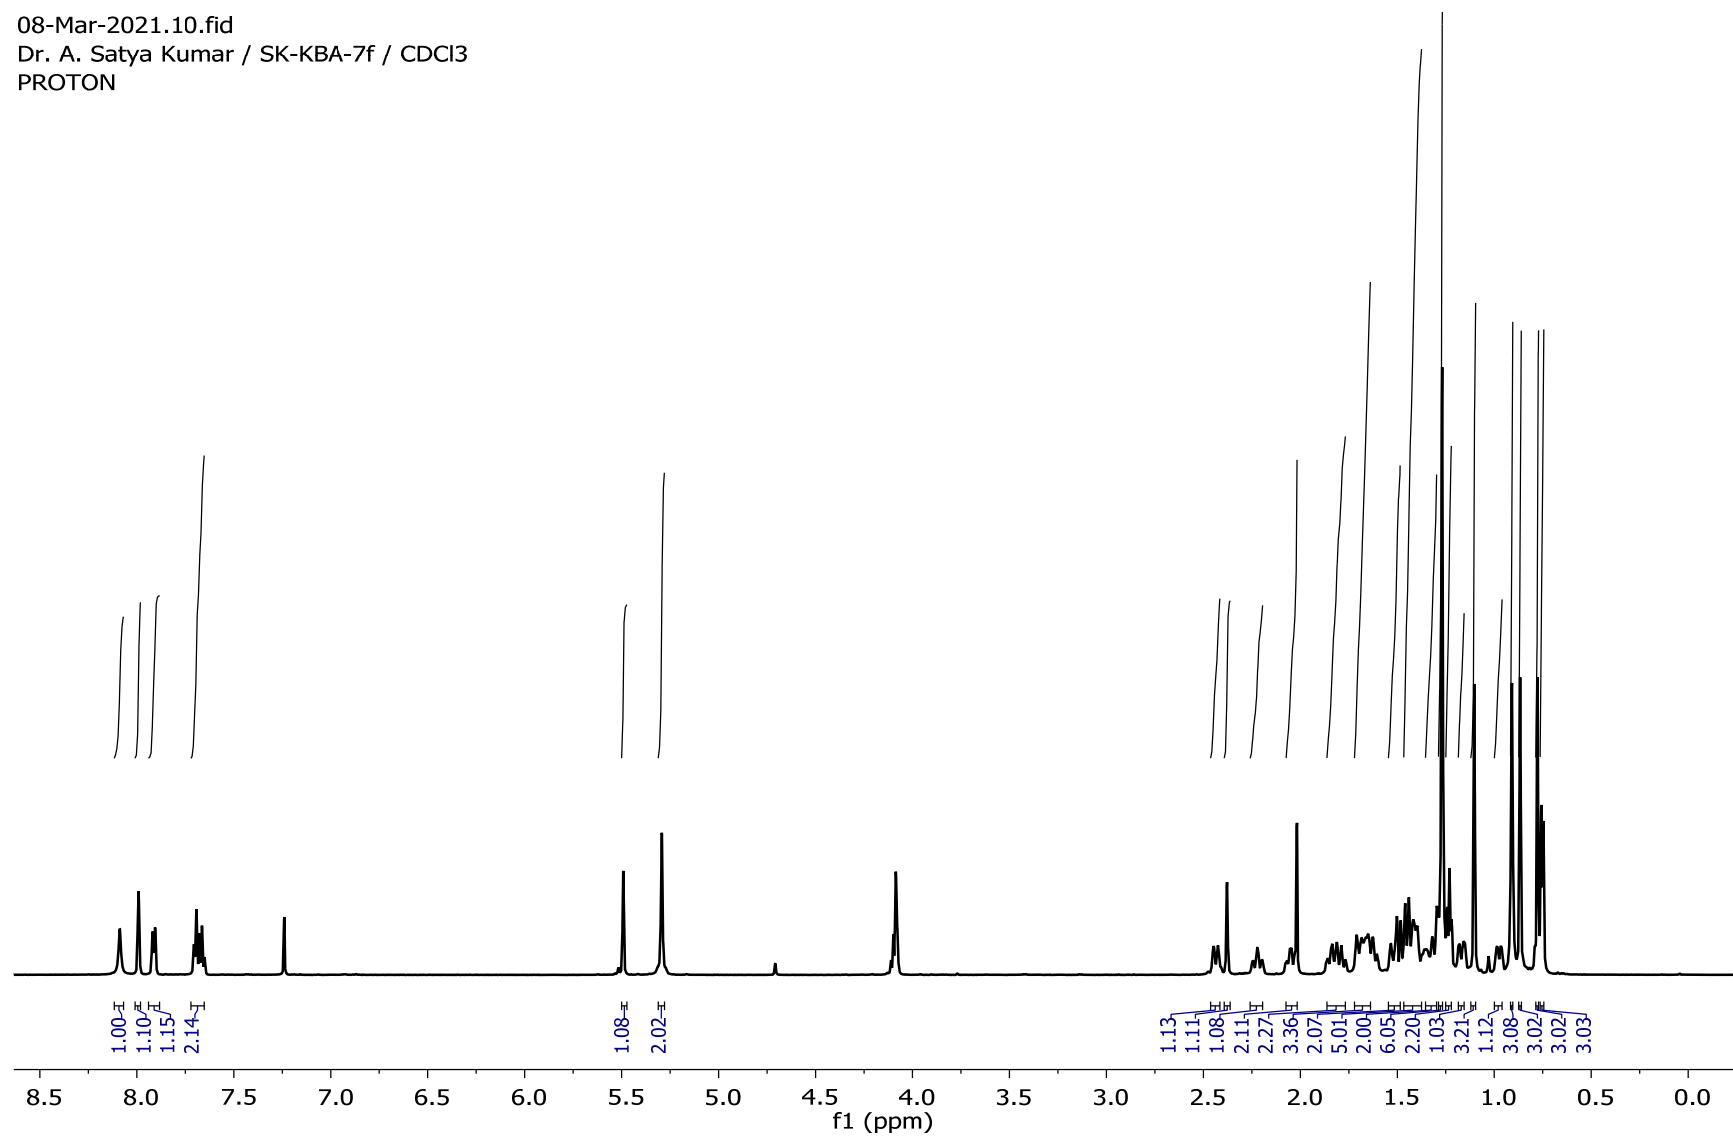

Figure S60: <sup>1</sup>H-NMR spectrum (600 MHz, CDCl<sub>3</sub>) of compound 7f

08-Mar-2021.11.fid  
Dr. A. Satya Kumar / SK-KBA-7f / CDCl<sub>3</sub>  
C13CPD

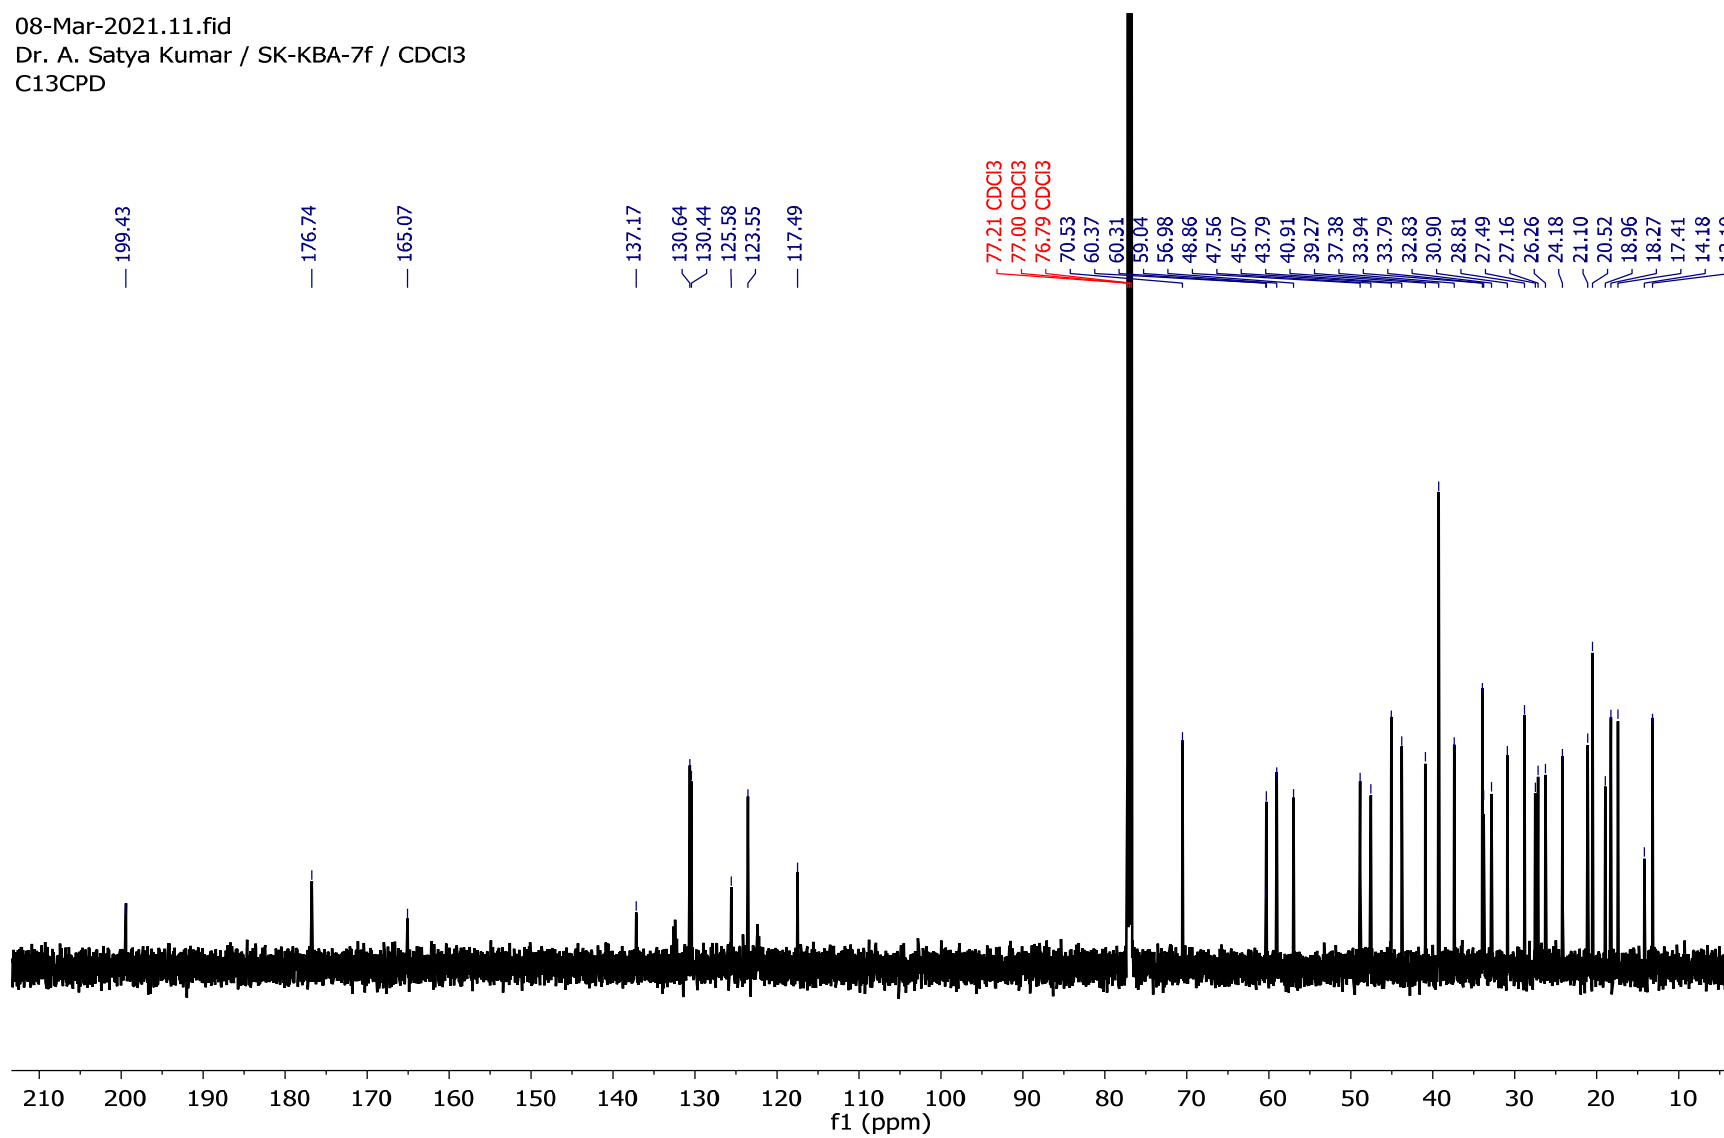

Figure S61: <sup>13</sup>C-NMR spectrum (150 MHz, CDCl<sub>3</sub>) of compound 7f

08-Mar-2021.14.fid  
Dr. A. Satya Kumar / SK-KBA-7f / CDCl<sub>3</sub>  
F19CPD

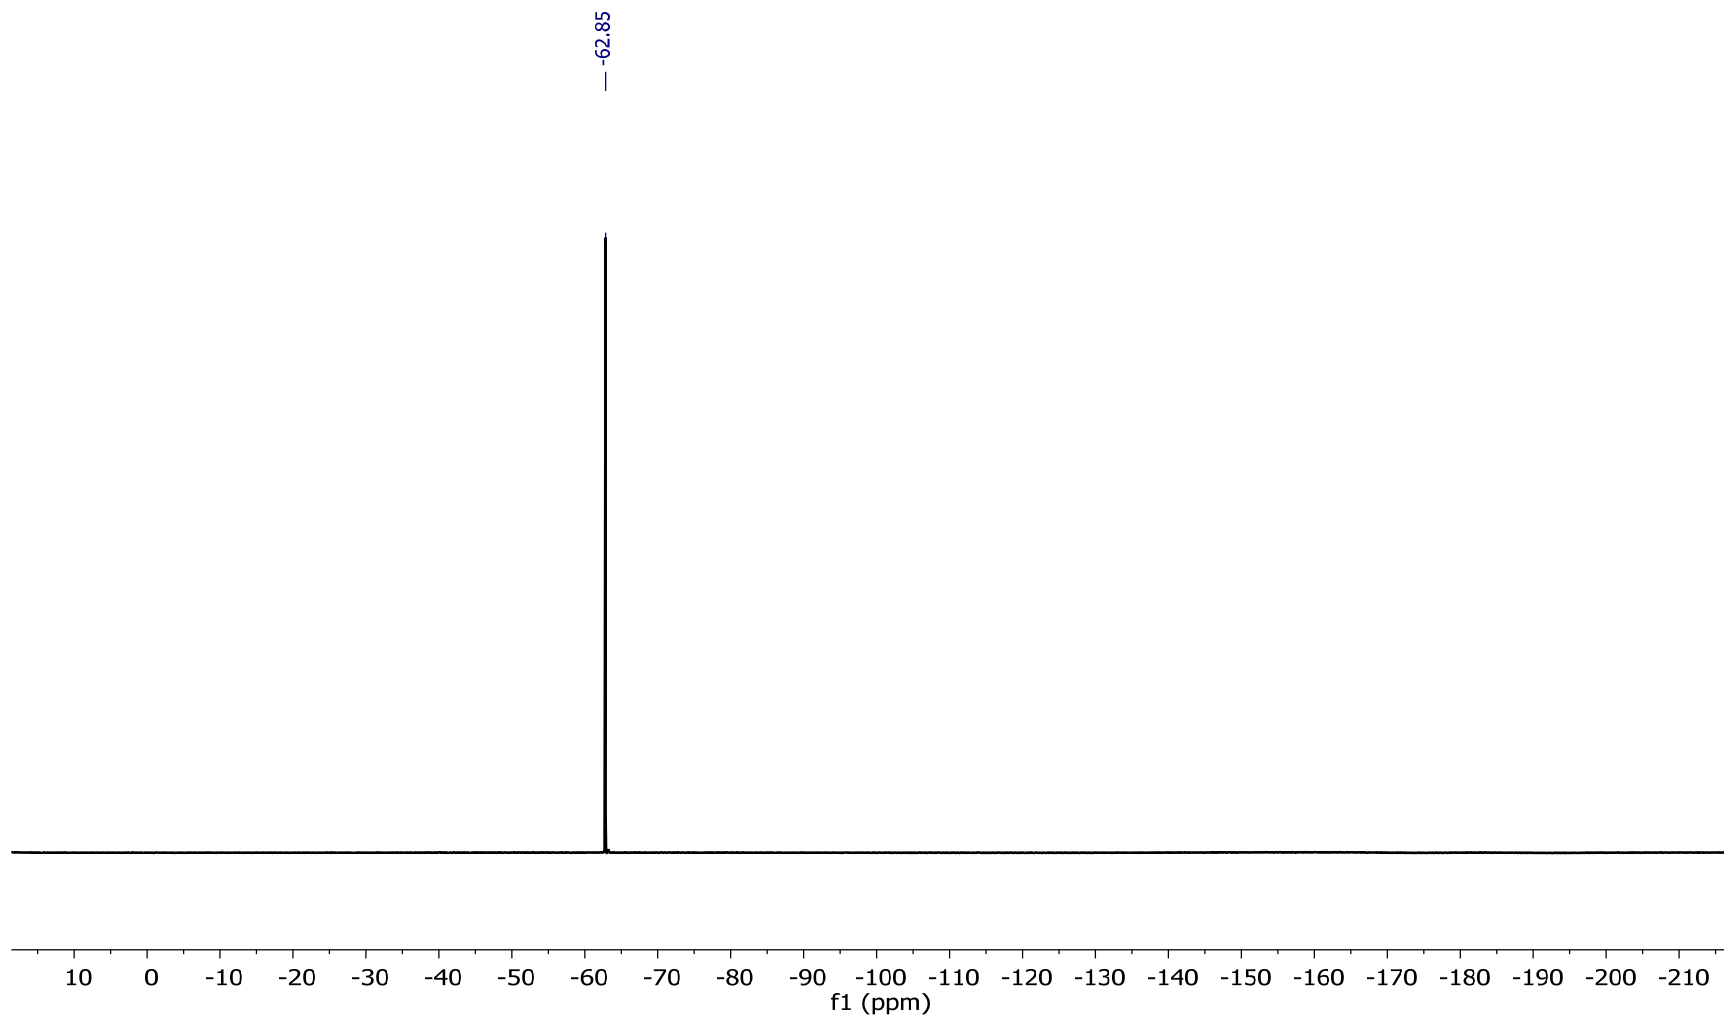

**Figure S62:** <sup>19</sup>F-NMR spectrum (564 MHz, CDCl<sub>3</sub>) of compound **7f**

|             |                          |                        |         |                 |                       |
|-------------|--------------------------|------------------------|---------|-----------------|-----------------------|
| Sample Name | SK-KBA-7F                | Position               | Vial 46 | Instrument Name | Instrument 1          |
| User Name   |                          | Inj Vol                | 2       | InjPosition     |                       |
| Sample Type | Sample                   | IRM Calibration Status | Success | Data Filename   | SK-KBA-7F.d           |
| ACQ Method  | POSITIVE ION METHOD MS.m | Comment                | PARTHA  | Acquired Time   | 17-Mar-21 12:41:31 PM |

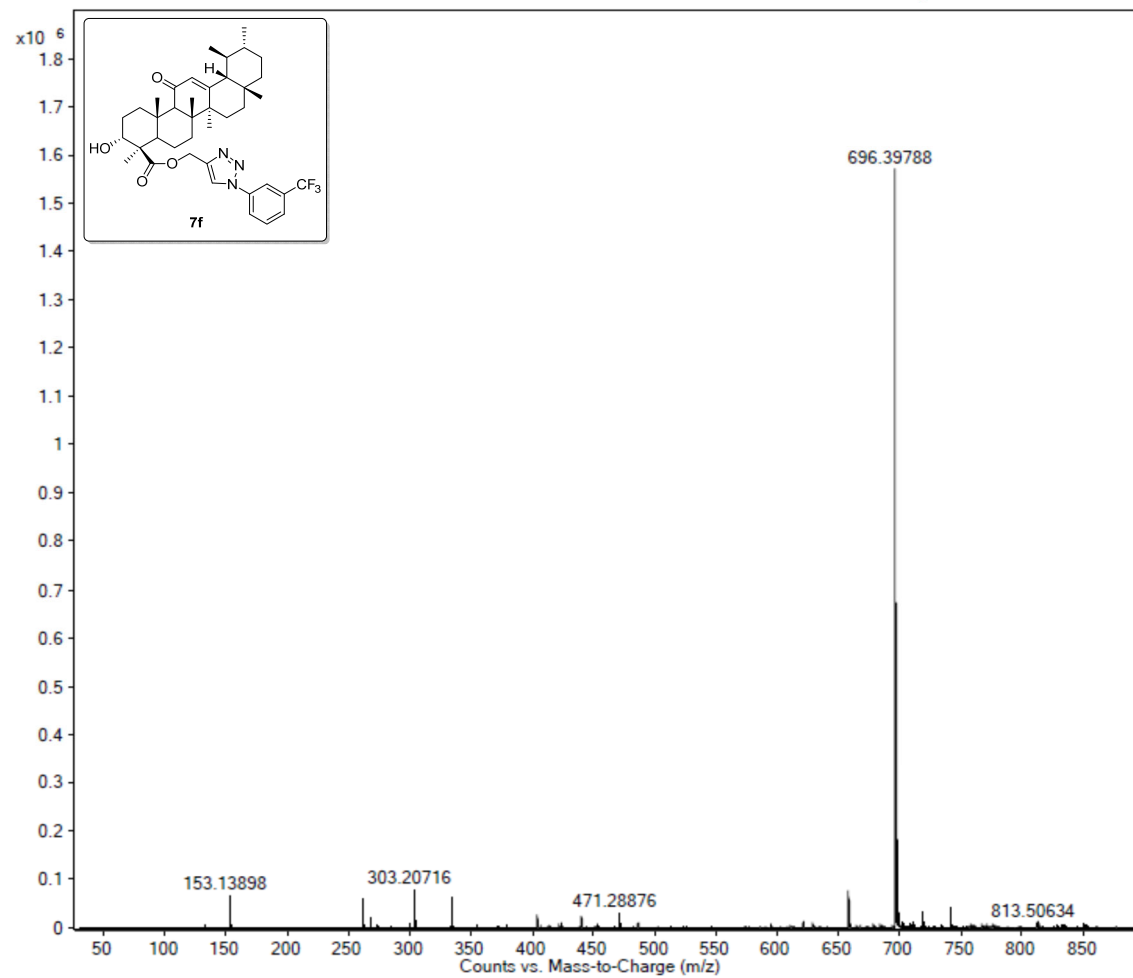

Figure S63: HRMS spectrum of compound **7f**

08-Mar-2021.15.fid  
Dr. A. Satya Kumar / SK-KBA-7g / CDCl<sub>3</sub>  
PROTON

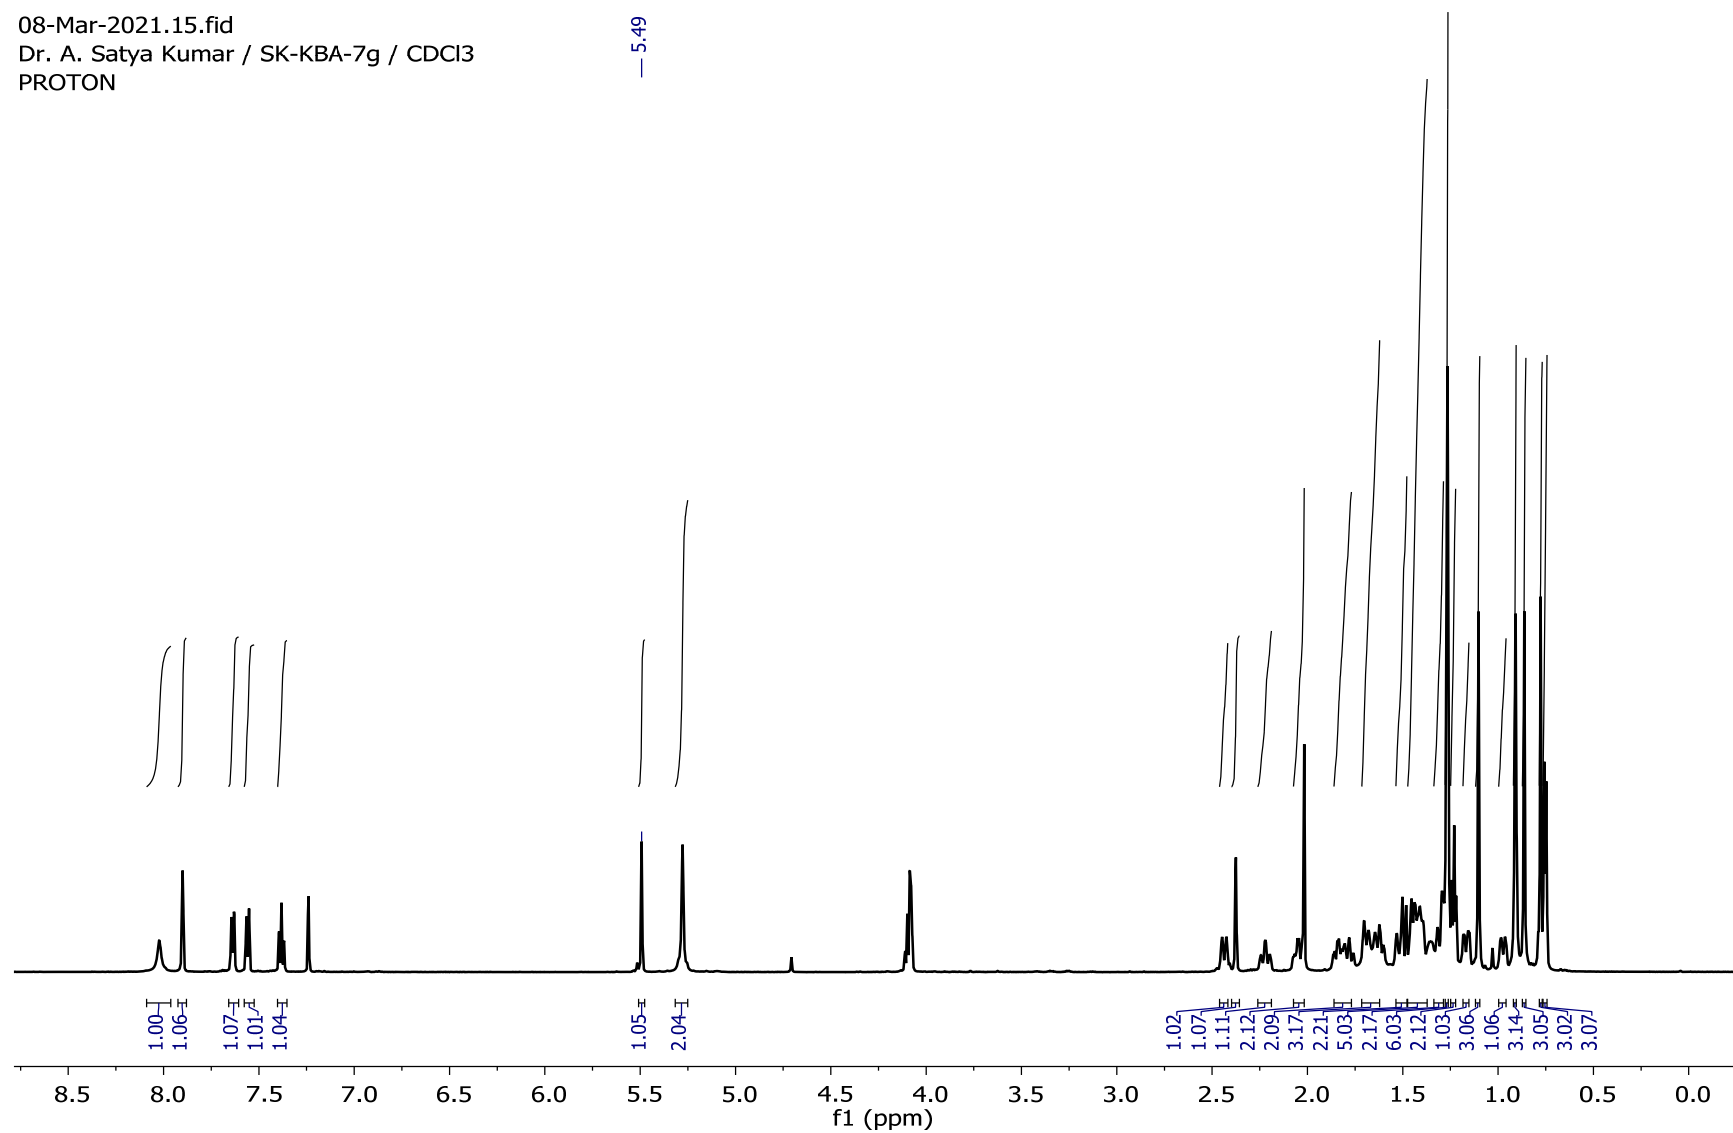

Figure S64: <sup>1</sup>H-NMR spectrum (600 MHz, CDCl<sub>3</sub>) of compound 7g

08-Mar-2021.16.fid  
Dr. A. Satya Kumar / SK-KBA-7g / CDCl<sub>3</sub>  
C13CPD

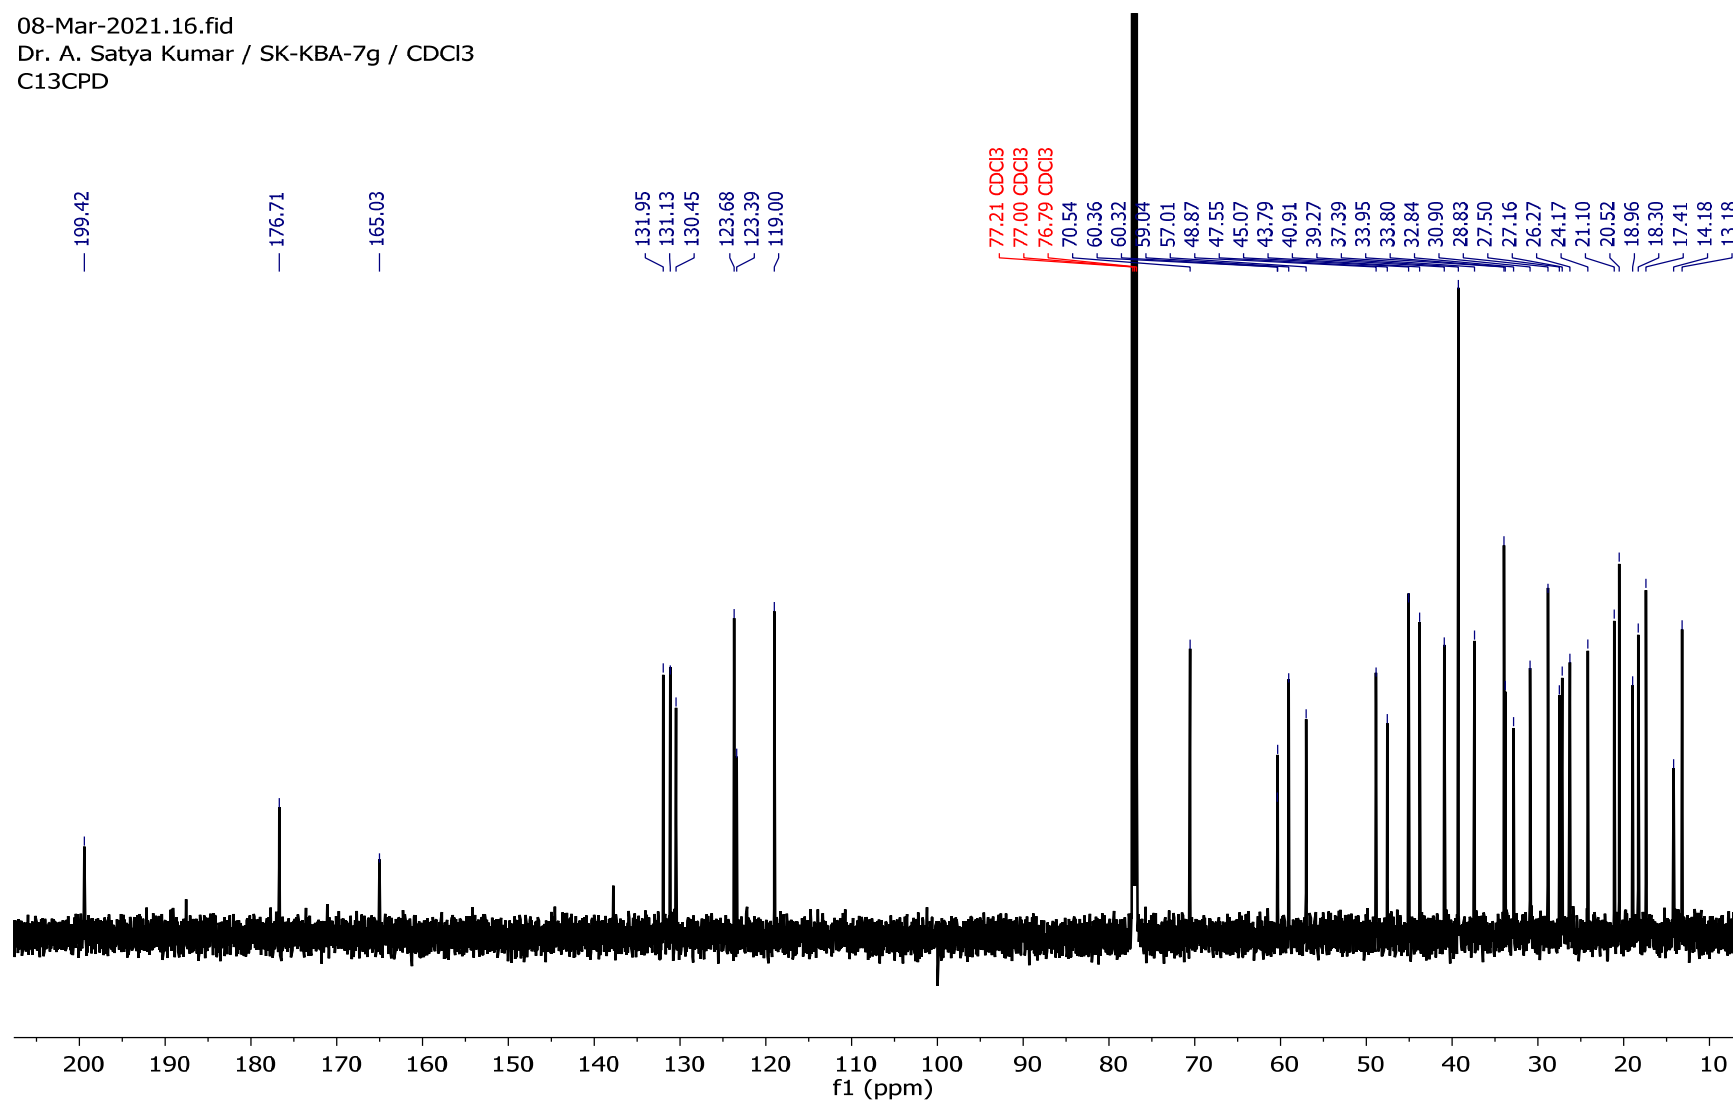

Figure S65: <sup>13</sup>C-NMR spectrum (150 MHz, CDCl<sub>3</sub>) of compound 7g

Sample Name  
User Name  
Sample Type  
ACQ Method

SK-KBA-7G  
Sample  
POSITIVE ION METHOD MS.m

Position  
Inj Vol  
IRM Calibration Status  
Comment

Vial 47  
2  
Success  
PARTHA

Instrument Name  
InjPosition  
Data Filename  
Acquired Time

Instrument 1  
  
SK-KBA-7G.d  
17-Mar-21 12:47:05 PM

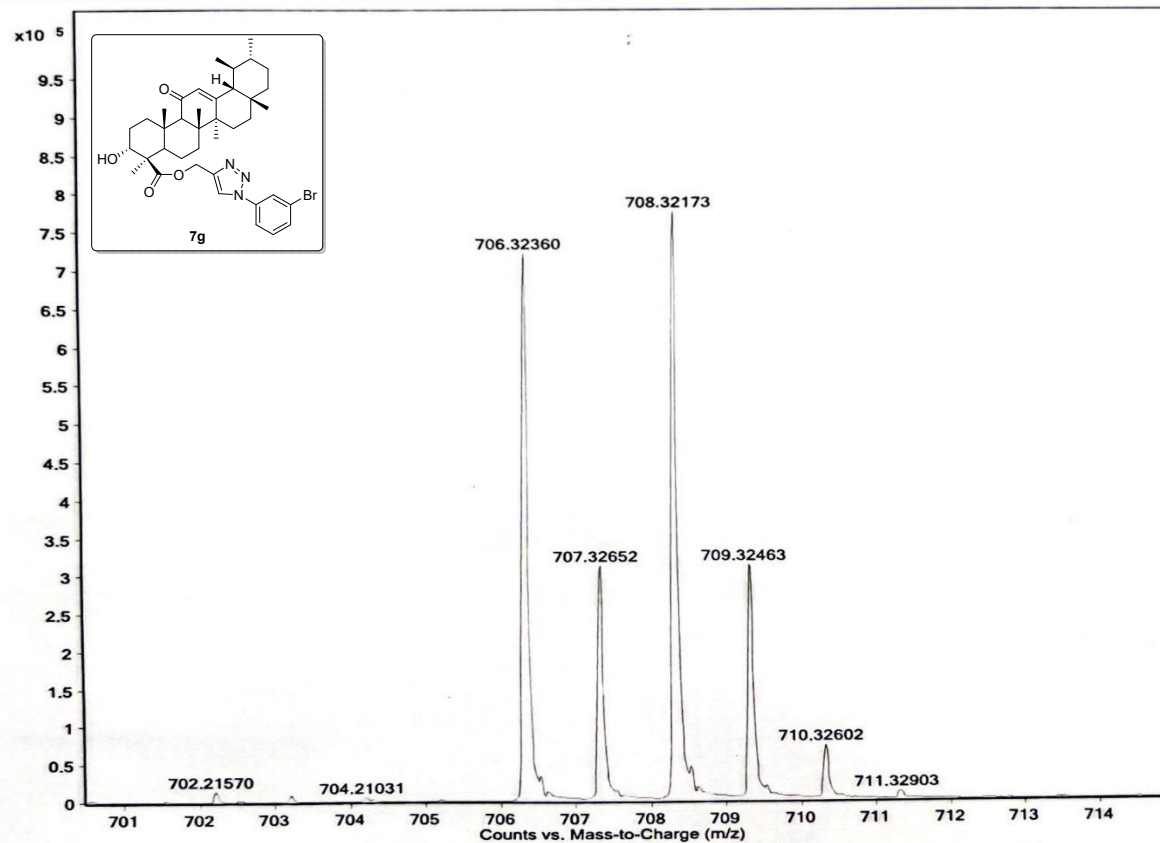

Figure S66: HRMS spectrum of compound 7g

08-Mar-2021.19.fid  
Dr. A. Satya Kumar / SK-KBA-7h / CDCl<sub>3</sub>  
PROTON

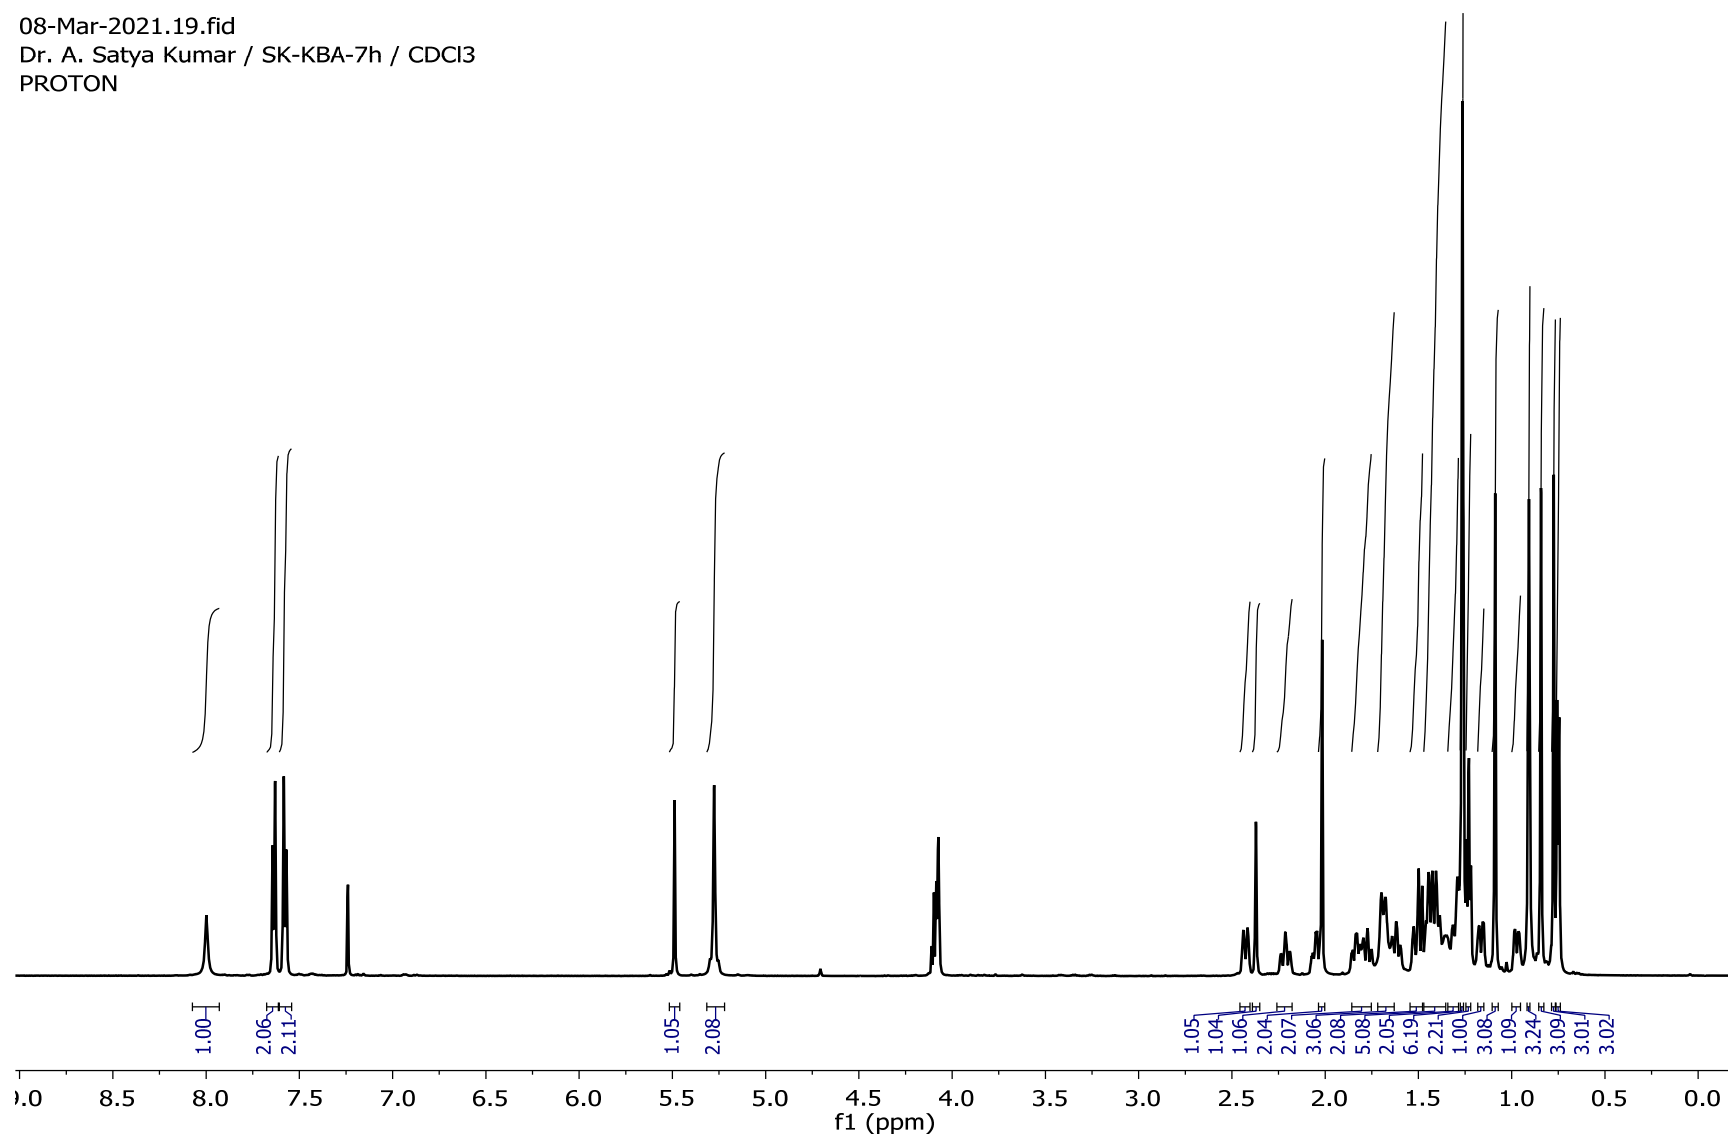

Figure S67: <sup>1</sup>H-NMR spectrum (600 MHz, CDCl<sub>3</sub>) of compound 7h



08-Mar-2021.20.fid  
Dr. A. Satya Kumar / SK-KBA-7h / CDCl<sub>3</sub>  
C13CPD

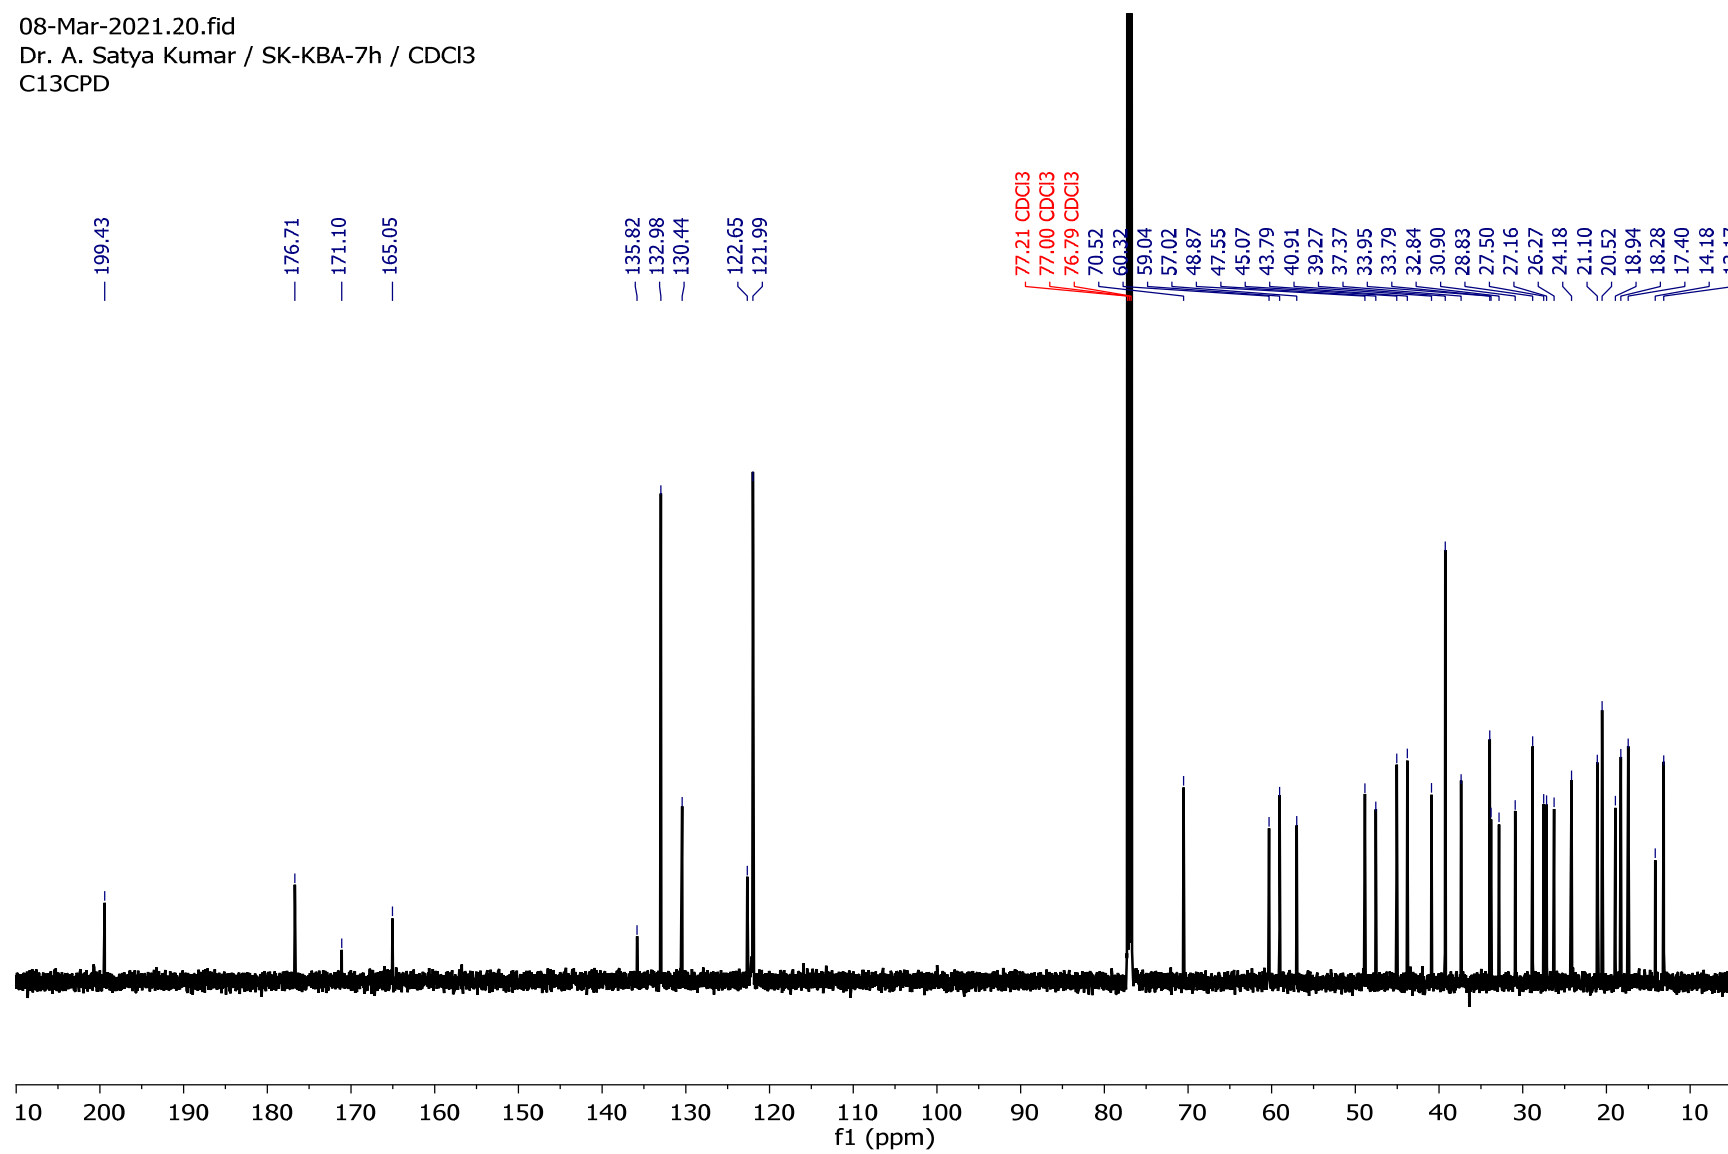

Figure S68: <sup>13</sup>C-NMR spectrum (150 MHz, CDCl<sub>3</sub>) of compound **7h**

Sample Name  
User Name  
Sample Type  
ACQ Method

SK-KBA-7H  
Sample  
POSITIVE ION METHOD MS.m

Position  
Inj Vol  
IRM Calibration Status  
Comment

Vial 48  
2  
Success  
PARTHA

Instrument Name  
InjPosition  
Data Filename  
Acquired Time

Instrument 1  
  
SK-KBA-7H.d  
17-Mar-21 12:52:46 PM

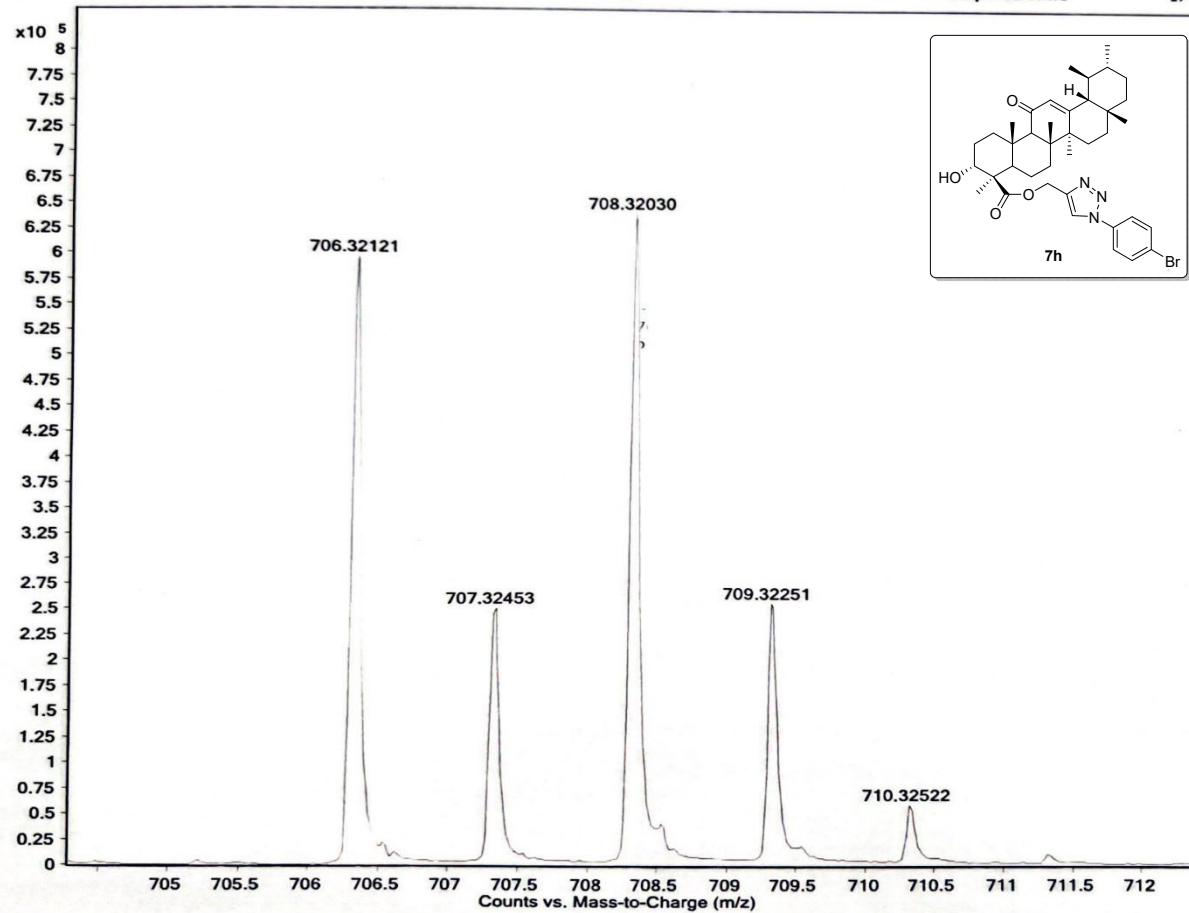

Figure S69: HRMS spectrum of compound 7h

21-Mar-2021.19.fid  
Dr. Kumar/SK-KBA-7I/ CDCl<sub>3</sub>  
PROTON

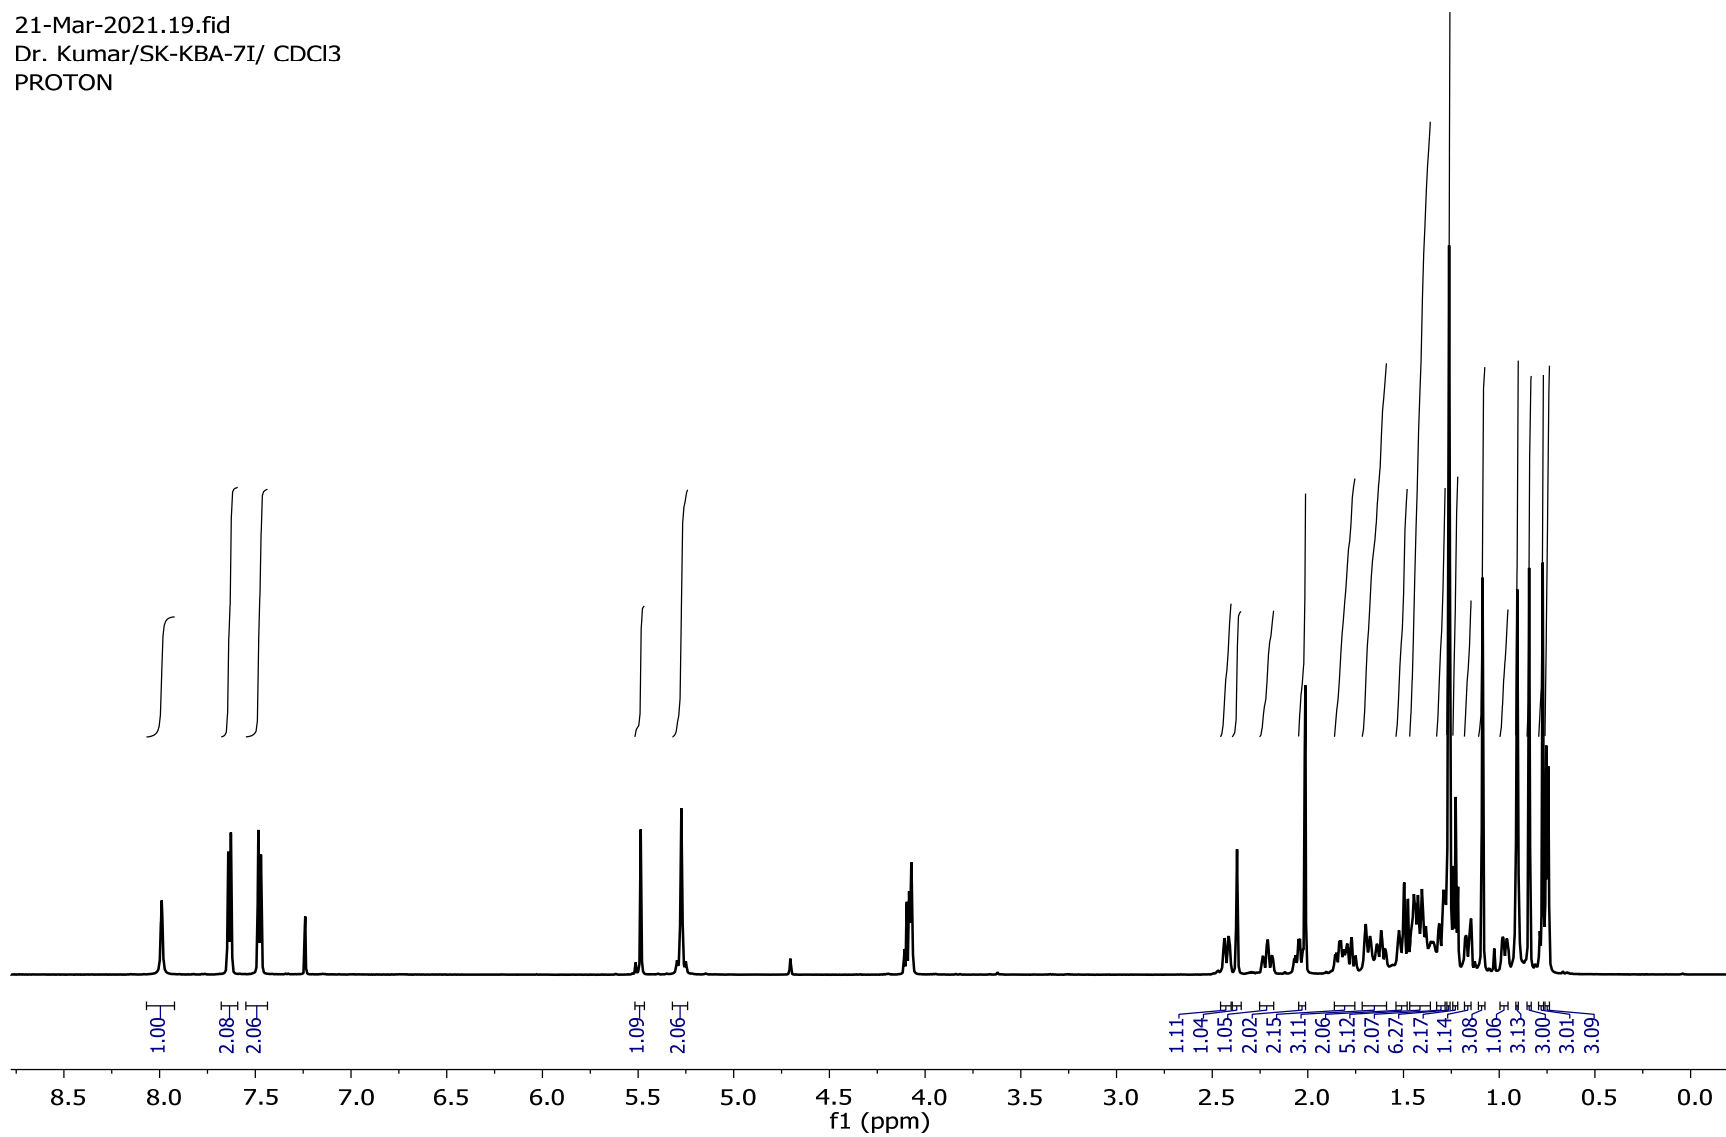

Figure S70: <sup>1</sup>H-NMR spectrum (600 MHz, CDCl<sub>3</sub>) of compound 7i

21-Mar-2021.20.fid  
Dr. Kumar/SK-KBA-7I/ CDCl<sub>3</sub>  
C13CPD

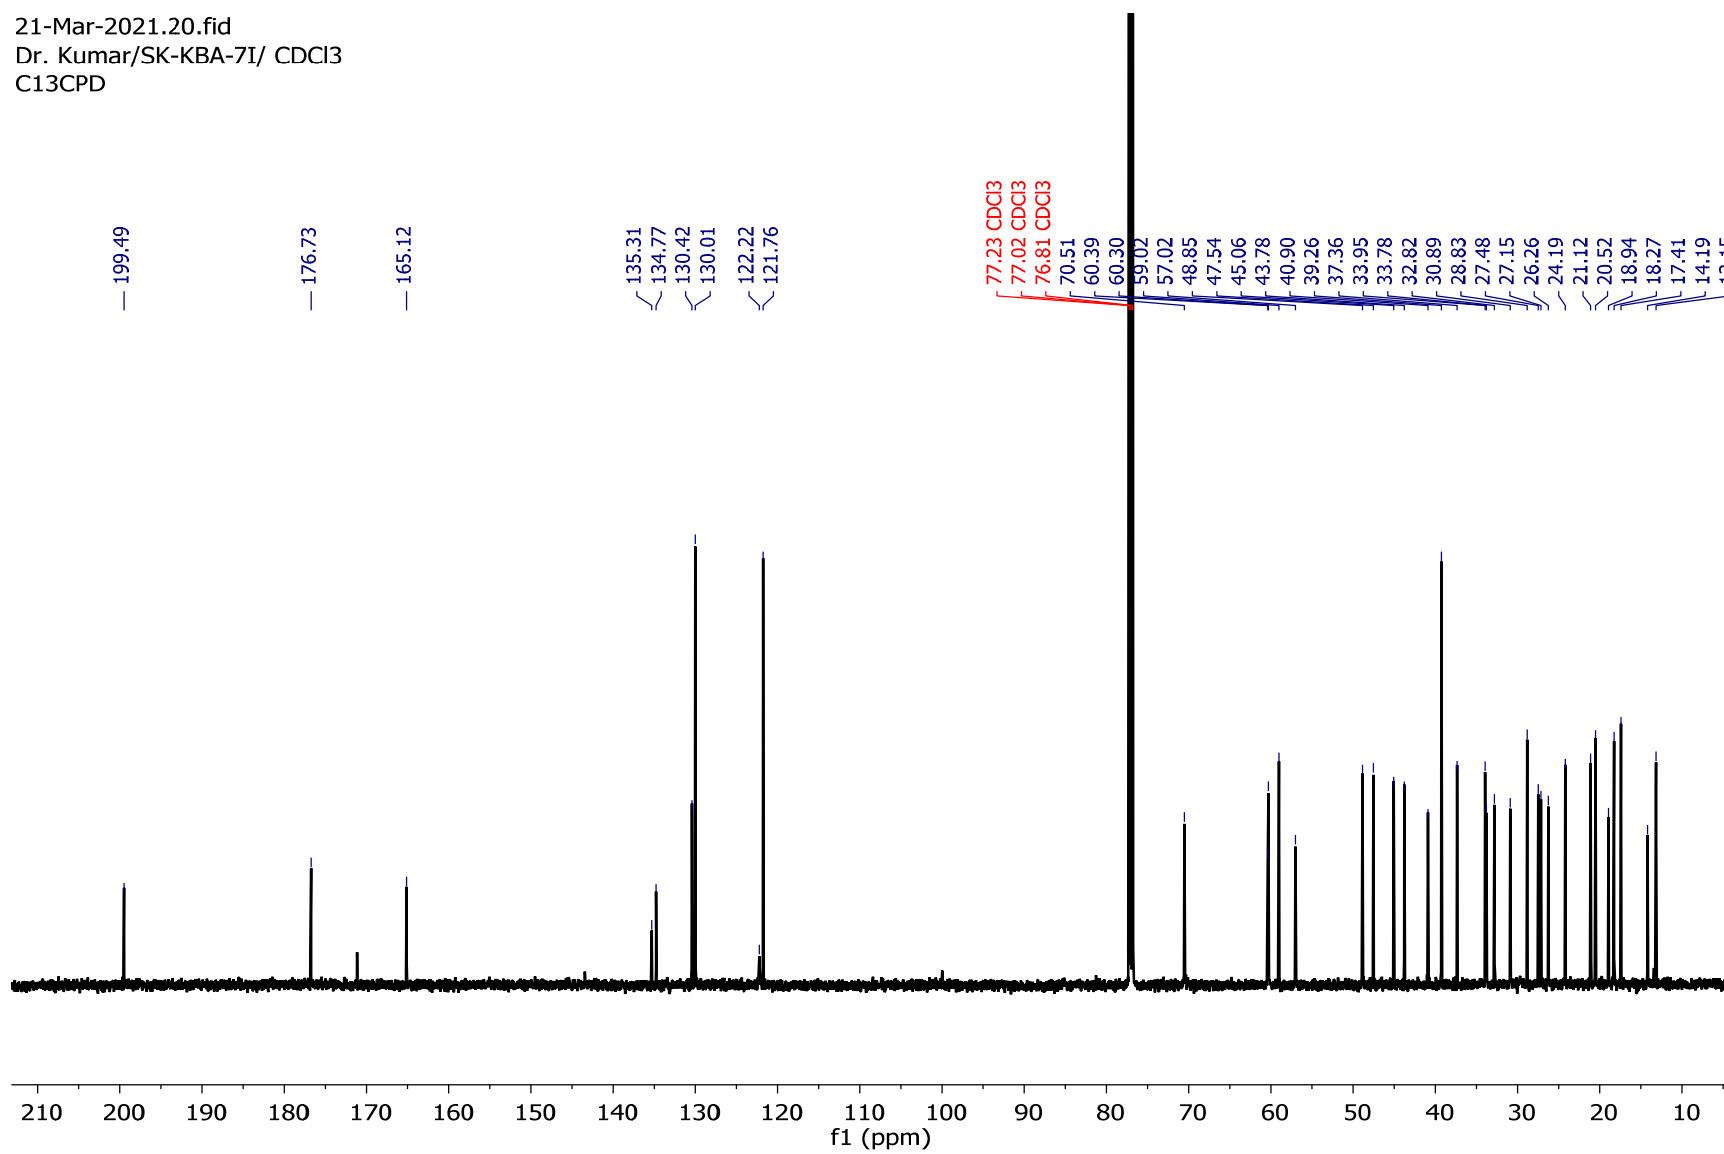

Figure S71: <sup>13</sup>C-NMR spectrum (150 MHz, CDCl<sub>3</sub>) of compound **7i**

|             |                          |                        |         |                 |                      |
|-------------|--------------------------|------------------------|---------|-----------------|----------------------|
| Sample Name | SK-KBA-7I                | Position               | Vial 34 | Instrument Name | Instrument 1         |
| User Name   |                          | Inj Vol                | 2       | InjPosition     |                      |
| Sample Type | Sample                   | IRM Calibration Status | Success | Data Filename   | SK-KBA-7I.d          |
| ACQ Method  | POSITIVE ION METHOD MS.m | Comment                |         | Acquired Time   | 22-Mar-21 2:56:25 PM |

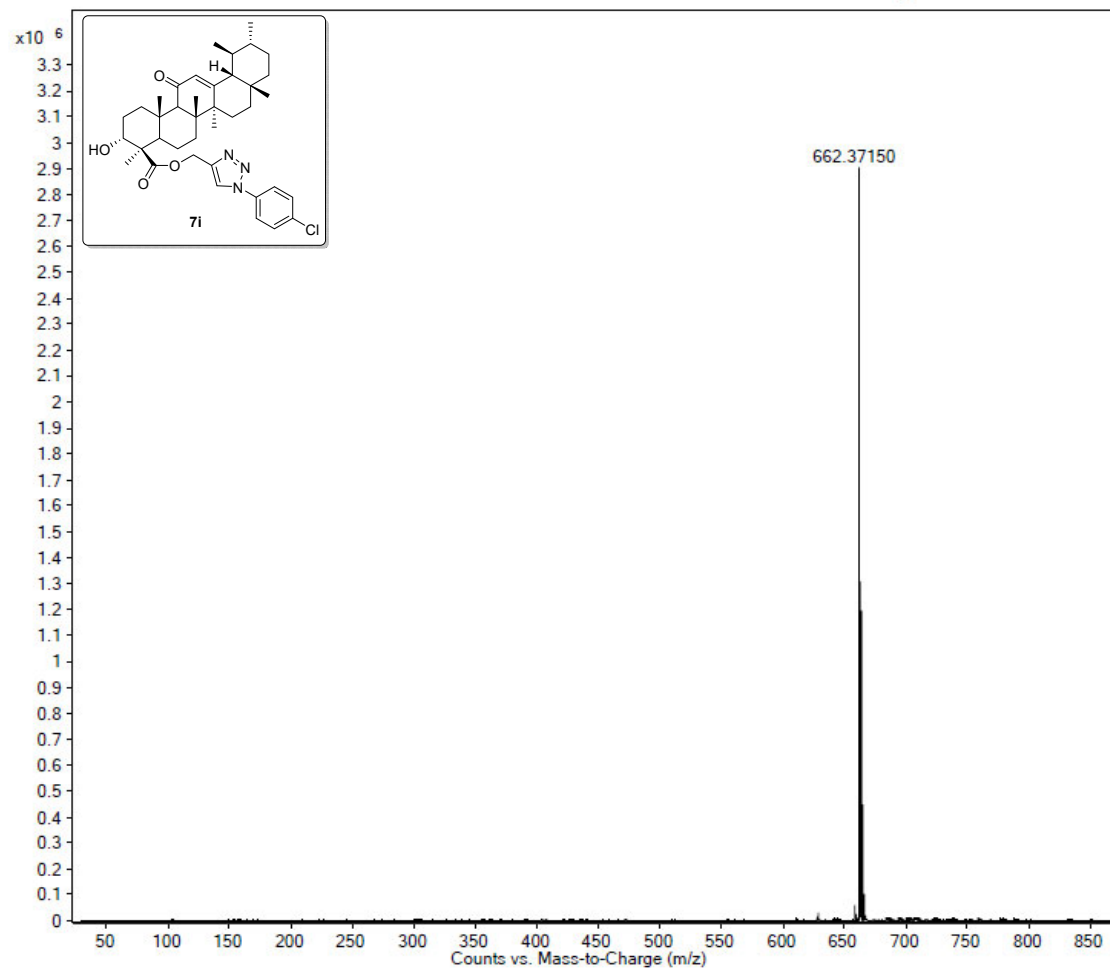

Figure S72: HRMS spectrum of compound **7i**

21-Mar-2021.24.fid  
Dr. Kumar/SK-KBA-7J/ CDCl<sub>3</sub>  
PROTON

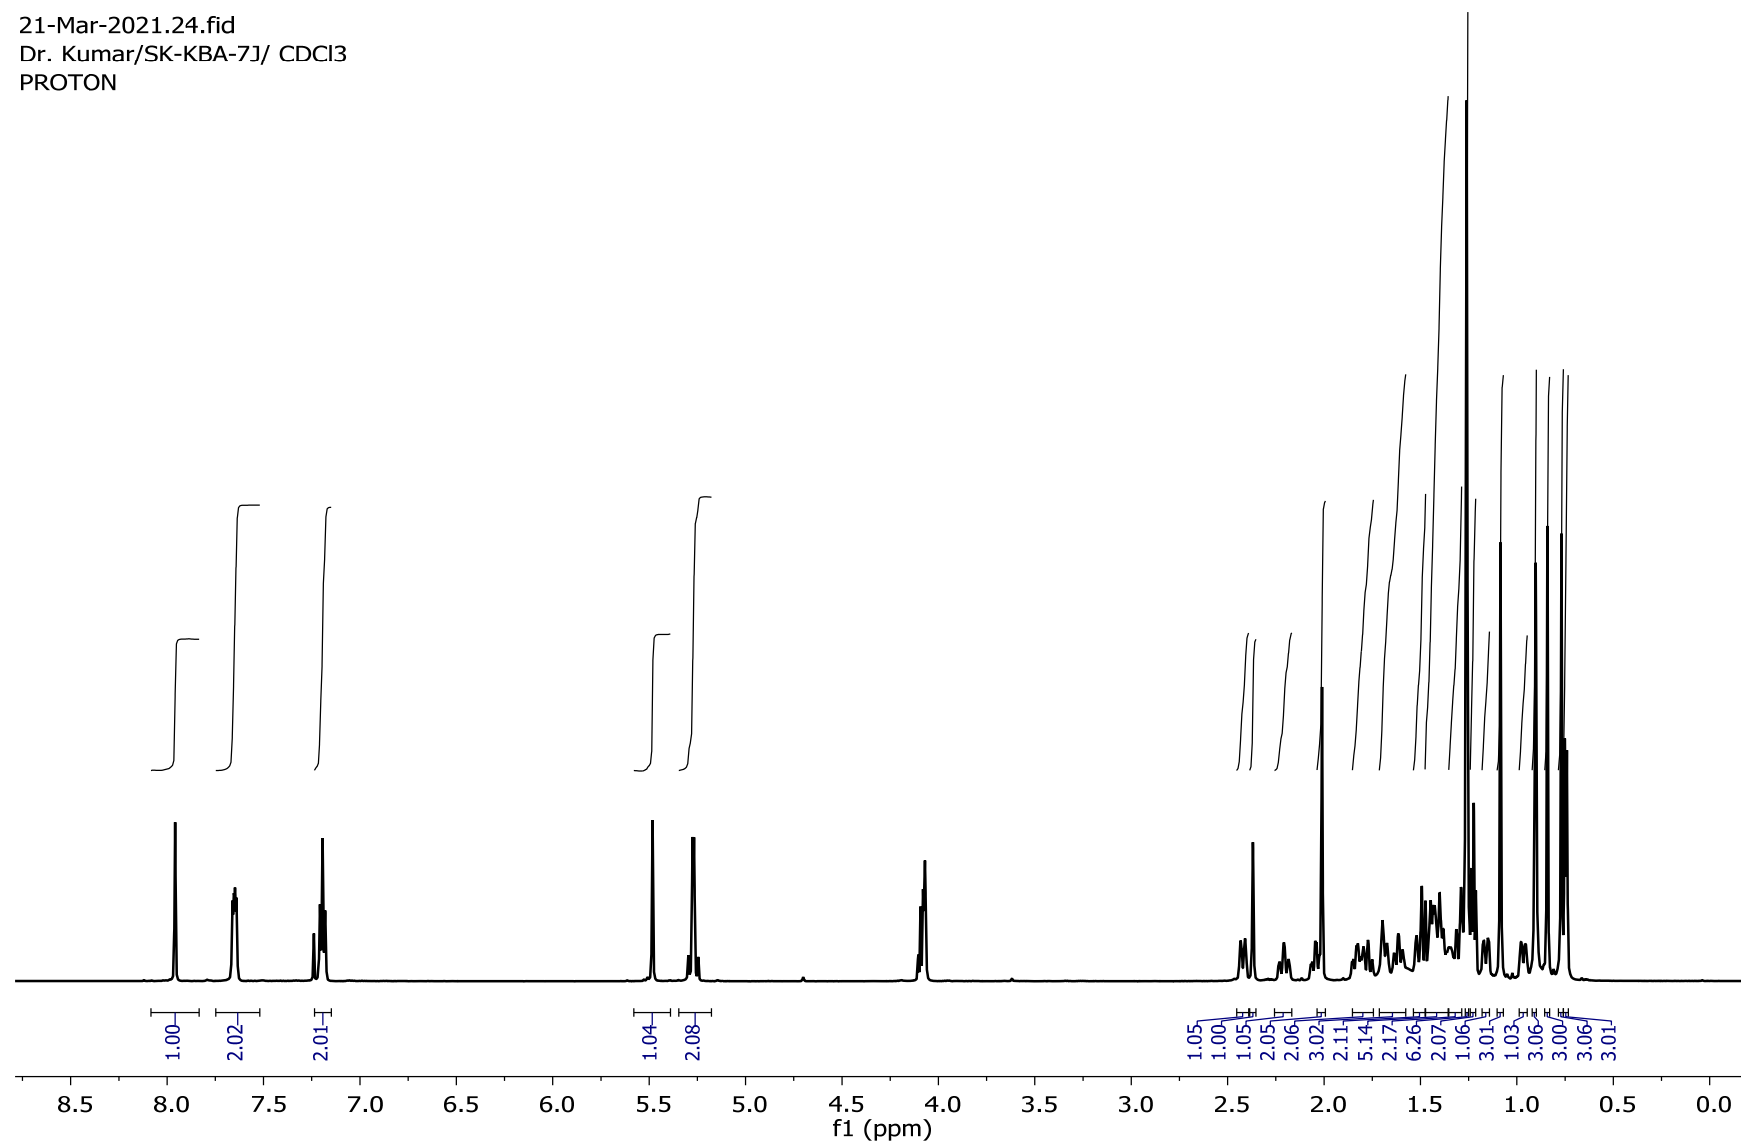

Figure S73: <sup>1</sup>H-NMR spectrum (600 MHz, CDCl<sub>3</sub>) of compound 7j

21-Mar-2021.25.fid  
Dr. Kumar/SK-KBA-7J/ CDCl<sub>3</sub>  
C13CPD

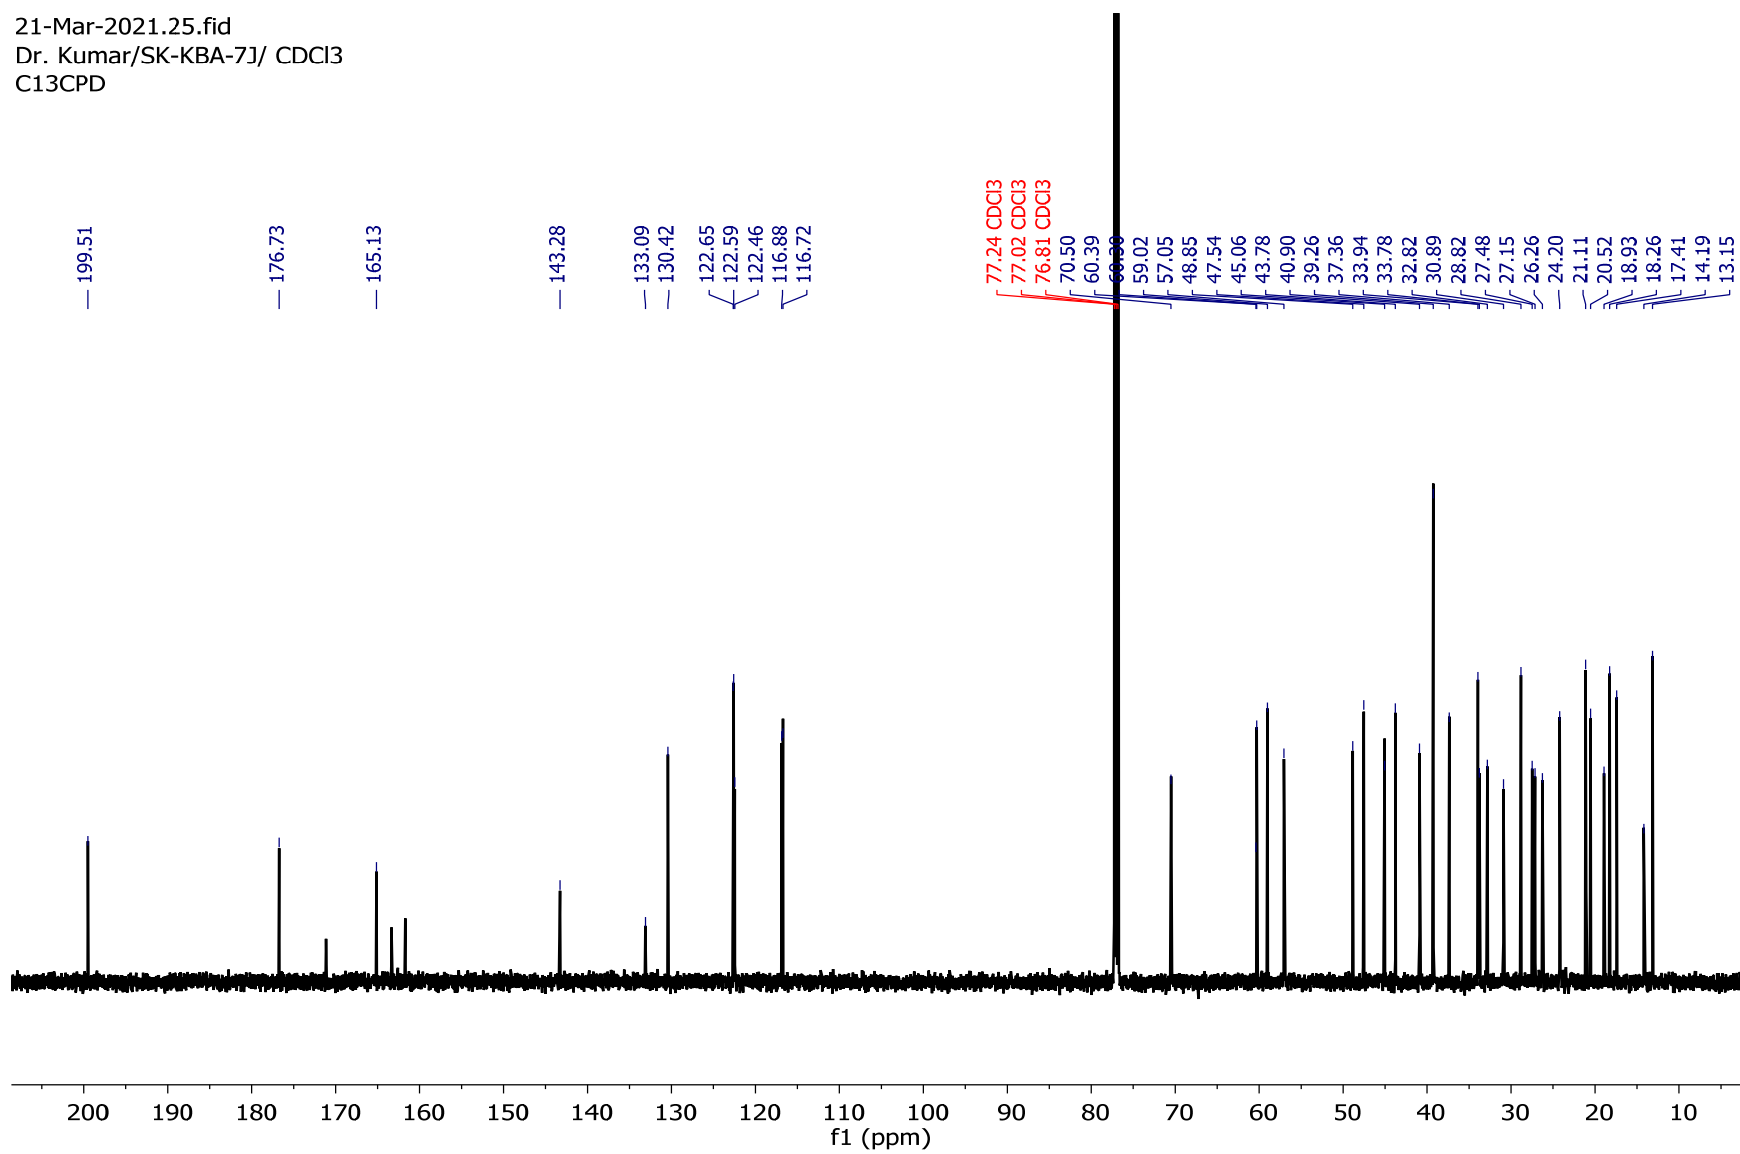

Figure S74: <sup>13</sup>C-NMR spectrum (150 MHz, CDCl<sub>3</sub>) of compound 7j

21-Mar-2021.28.fid  
Dr. Kumar/SK-KBA-7J/ CDCl<sub>3</sub>  
F19CPD

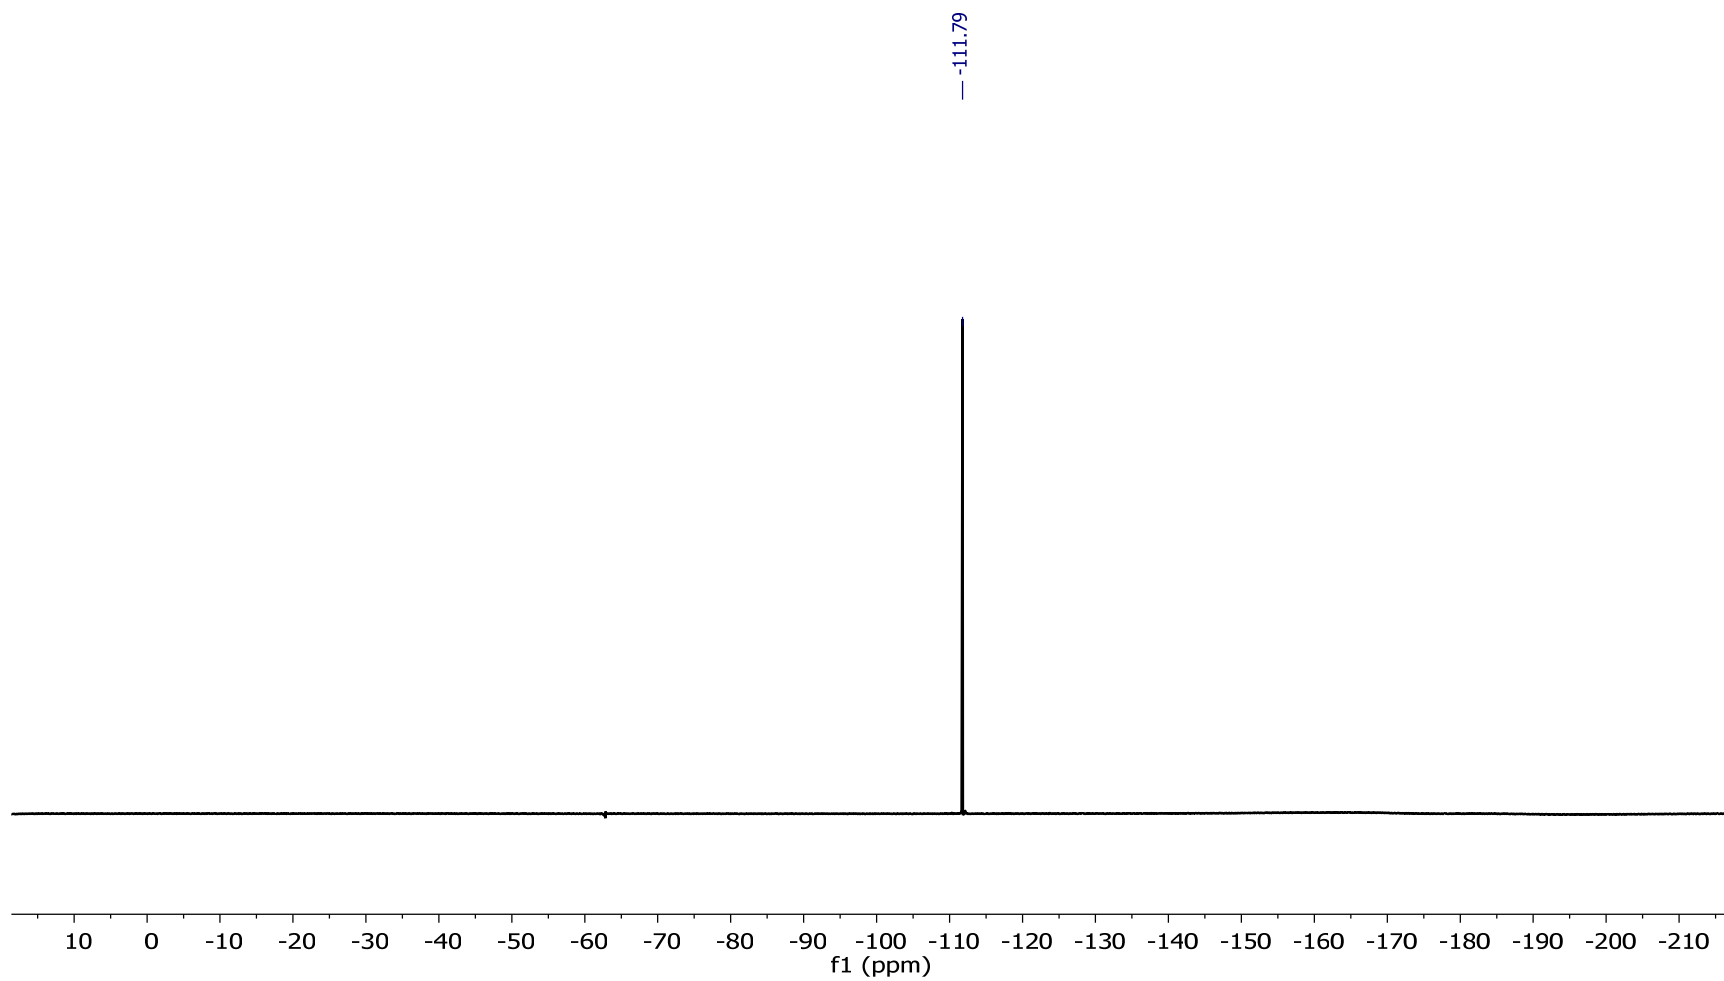

**Figure S75:** <sup>19</sup>F-NMR spectrum (564 MHz, CDCl<sub>3</sub>) of compound 7j



|             |                          |                        |         |                 |                      |
|-------------|--------------------------|------------------------|---------|-----------------|----------------------|
| Sample Name | SK-KBA-7J                | Position               | Vial 35 | Instrument Name | Instrument 1         |
| User Name   |                          | Inj Vol                | 2       | InjPosition     |                      |
| Sample Type | Sample                   | IRM Calibration Status | Success | Data Filename   | SK-KBA-7J.d          |
| ACQ Method  | POSITIVE ION METHOD MS.m | Comment                |         | Acquired Time   | 22-Mar-21 3:02:06 PM |

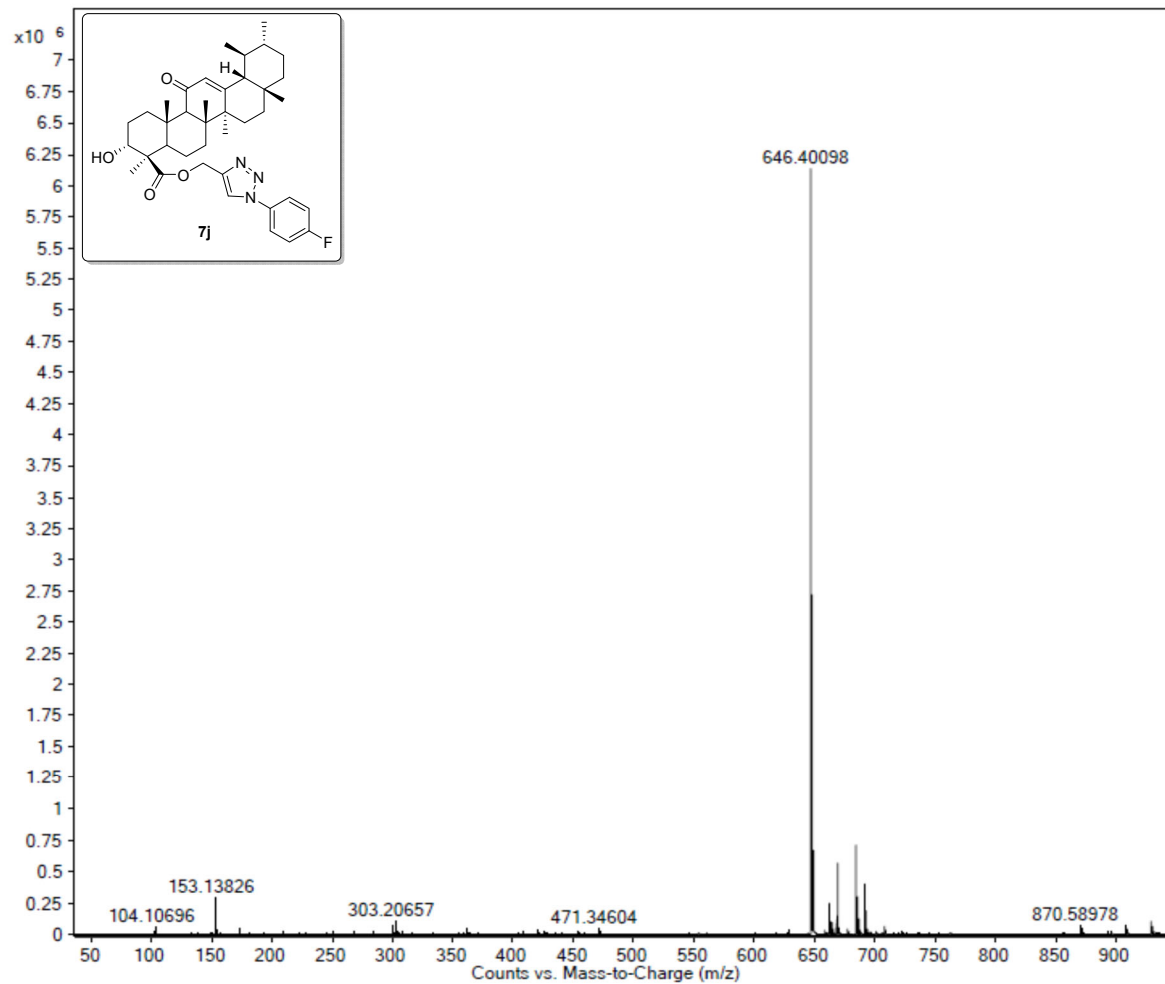

Figure S76: HRMS spectrum of compound 7j

21-Mar-2021.29.fid  
Dr. Kumar/SK-KBA-7K/ CDCl<sub>3</sub>  
PROTON

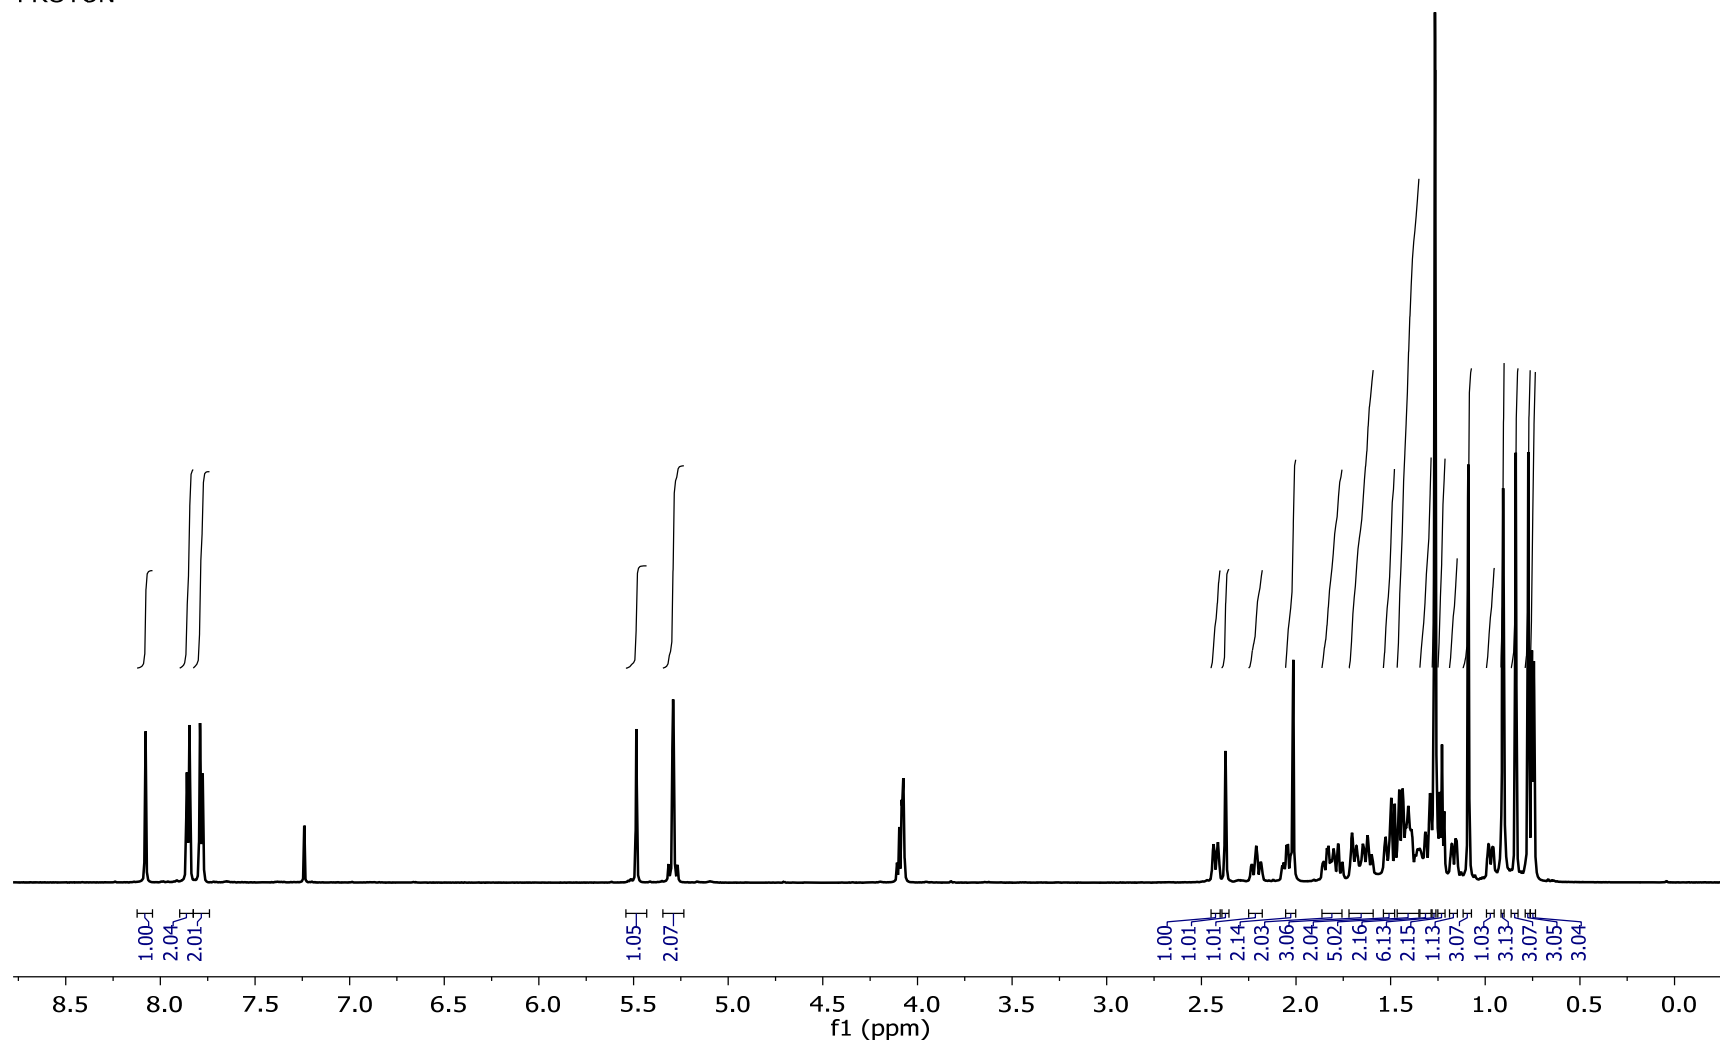

Figure S77: <sup>1</sup>H-NMR spectrum (600 MHz, CDCl<sub>3</sub>) of compound 7k

21-Mar-2021.30.fid  
Dr. Kumar/SK-KBA-7K/ CDCl<sub>3</sub>  
C13CPD

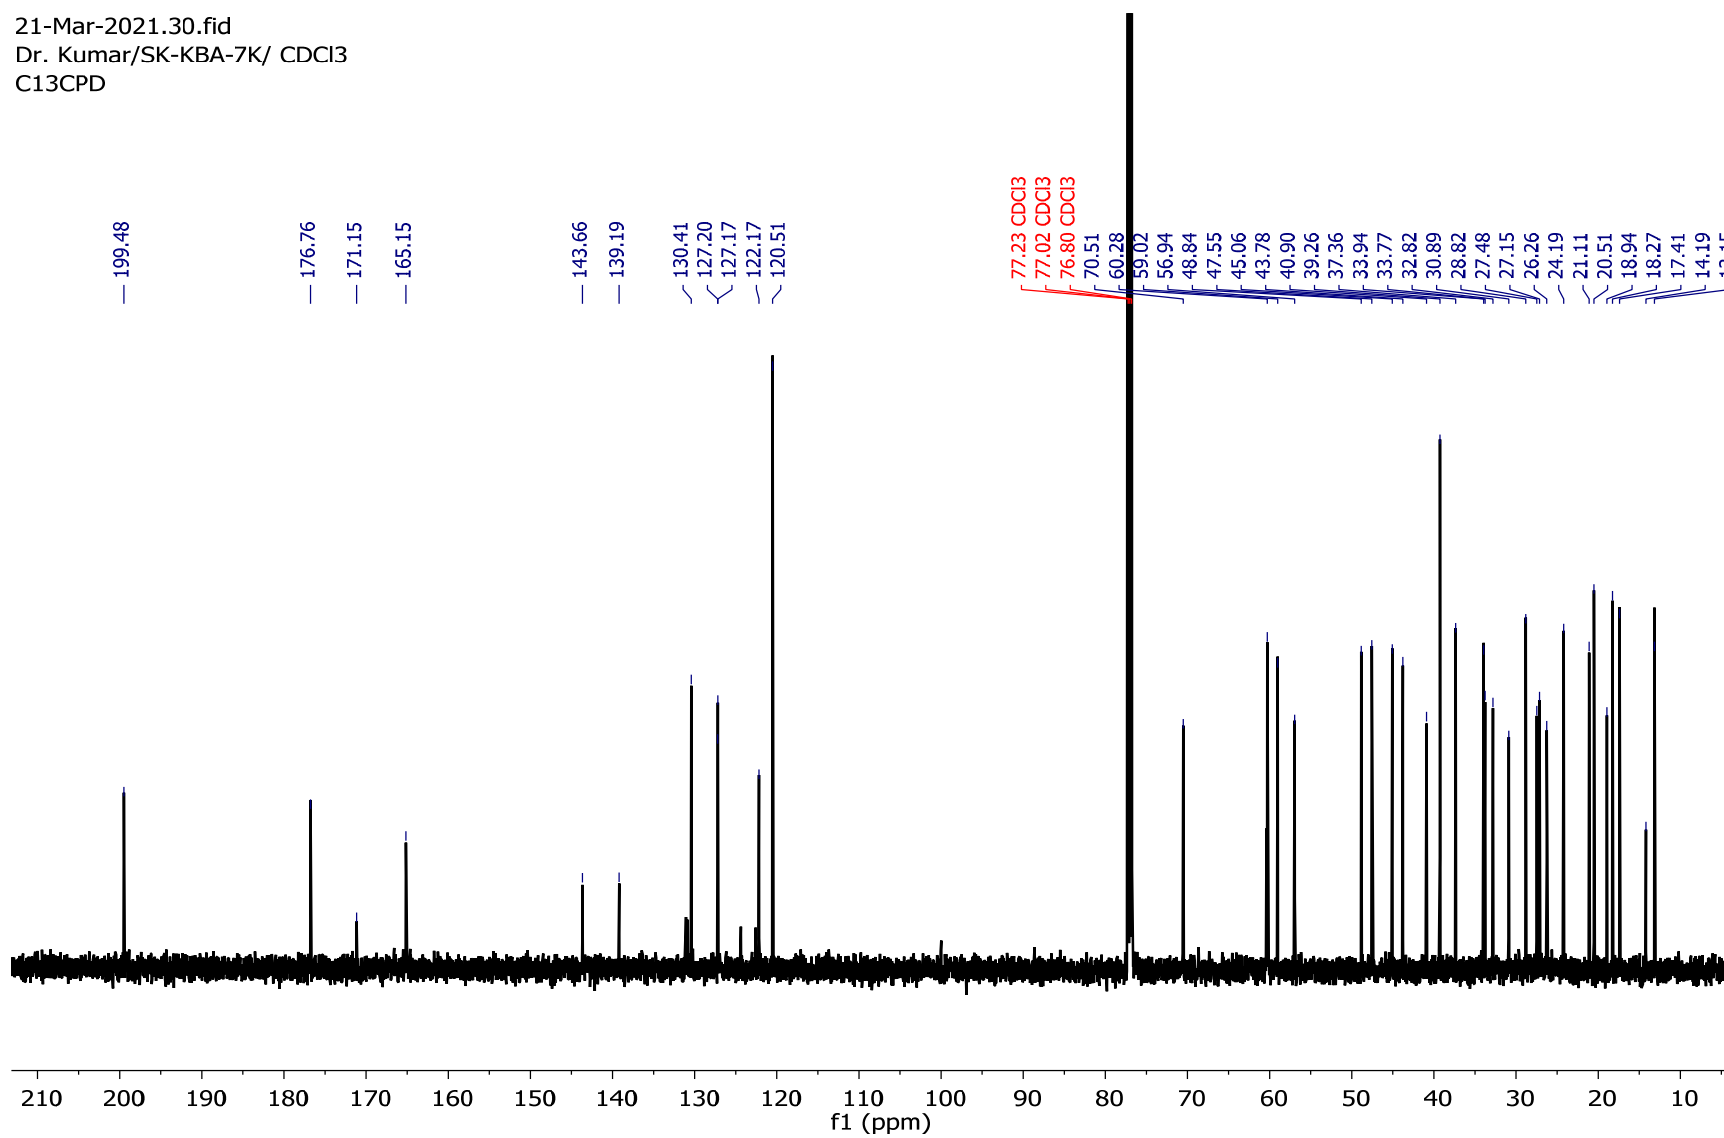

Figure S78: <sup>13</sup>C-NMR spectrum (150 MHz, CDCl<sub>3</sub>) of compound 7k

21-Mar-2021.33.fid  
Dr. Kumar/SK-KBA-7K/ CDCl<sub>3</sub>  
F19CPD

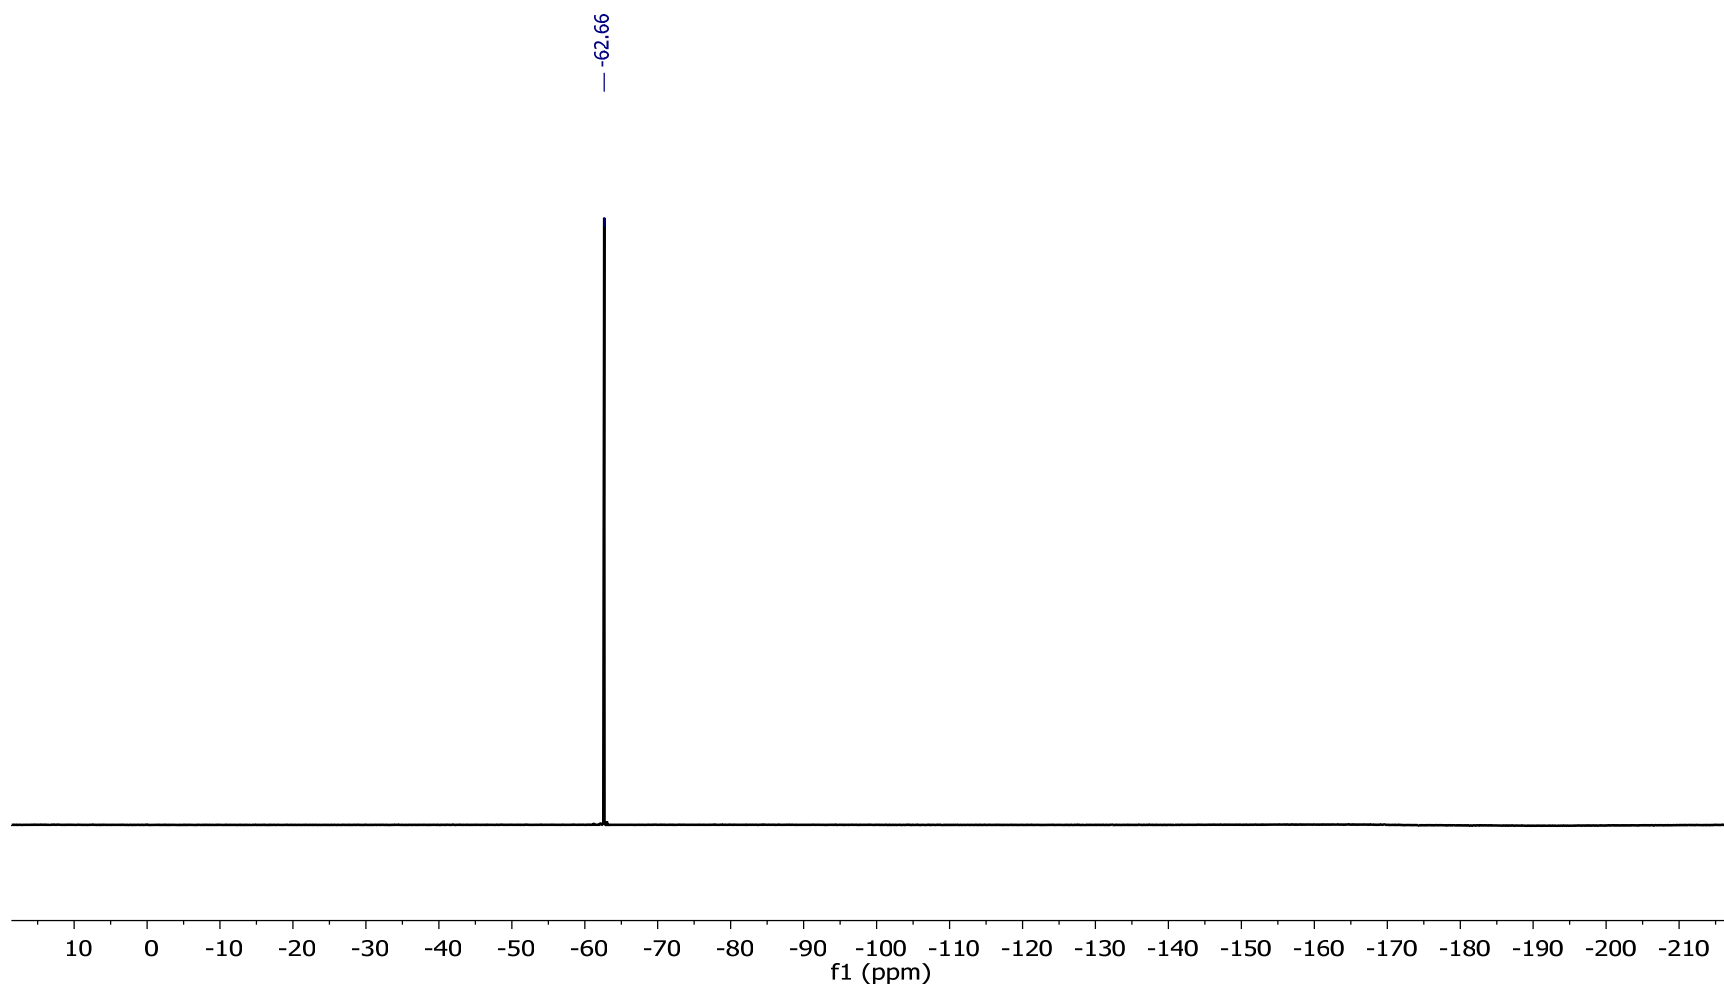

Figure S79: <sup>19</sup>F-NMR spectrum (564 MHz, CDCl<sub>3</sub>) of compound **7k**

|             |                          |                        |         |                 |                      |
|-------------|--------------------------|------------------------|---------|-----------------|----------------------|
| Sample Name | SK-KBA-7K                | Position               | Vial 36 | Instrument Name | Instrument 1         |
| User Name   |                          | Inj Vol                | 2       | InjPosition     |                      |
| Sample Type | Sample                   | IRM Calibration Status | Success | Data Filename   | SK-KBA-7K.d          |
| ACQ Method  | POSITIVE ION METHOD MS.m | Comment                |         | Acquired Time   | 22-Mar-21 3:07:40 PM |

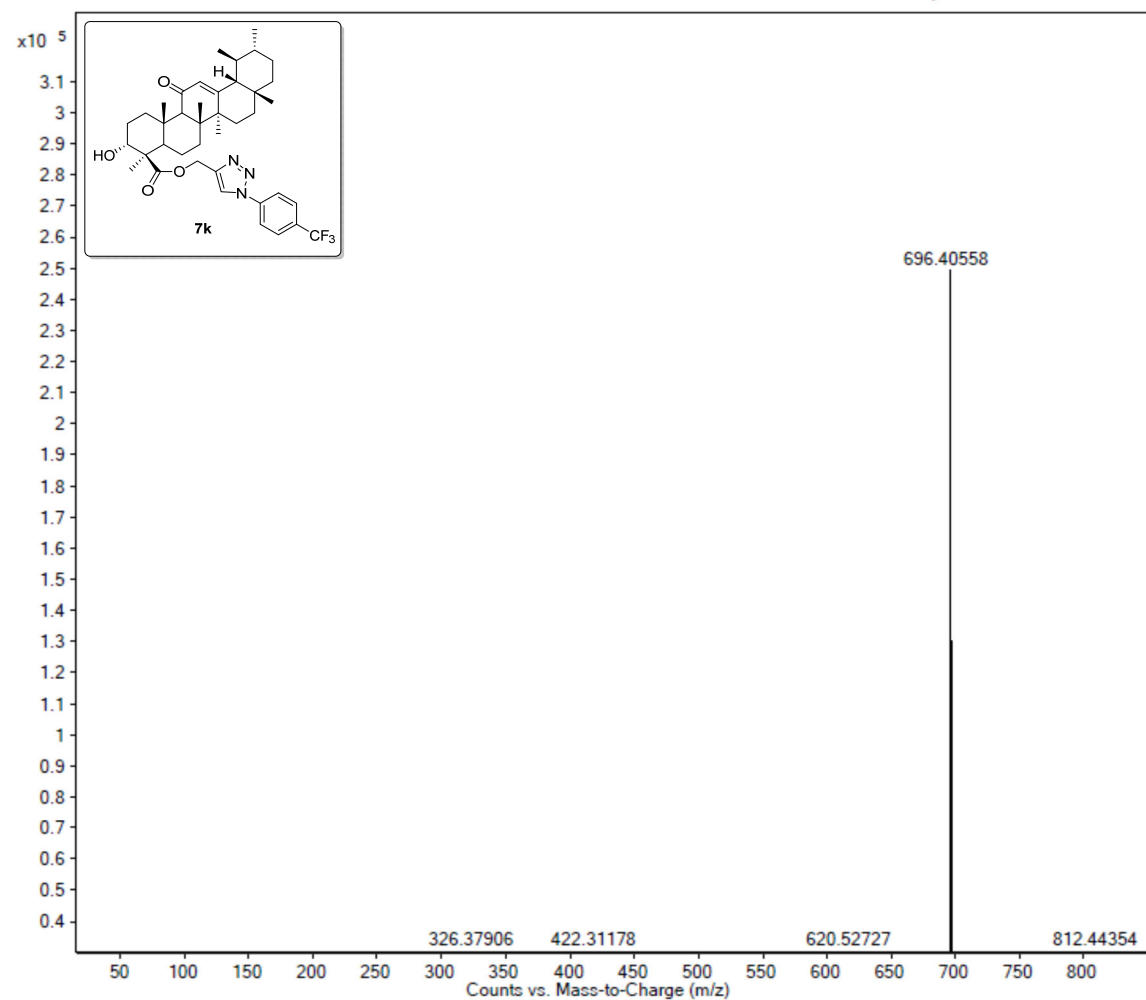

Figure S80: HRMS spectrum of compound **7k**

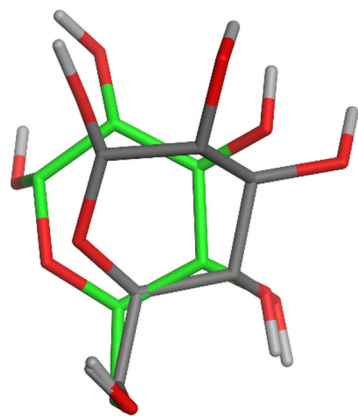

**Figure S81.** The re-docked conformation (green stick model) of maltose is superimposed on the X-ray conformation (grey stick model) present in the PDB code 3A4A

**Table S1.** The docking results of all the compounds.

| Compounds | Score<br>(Kcal/mol) | Ligand<br>Atom | Receptor<br>Atom | Interaction | Distance<br>(Å) |
|-----------|---------------------|----------------|------------------|-------------|-----------------|
| <b>6f</b> | -9.18               | O75            | NE2-HIS280       | HBA         | 2.00            |
|           |                     | O97            | N-ARG315         | HBA         | 2.55            |
|           |                     | O98            | N-ARG315         | HBA         | 2.44            |
|           |                     | O86            | OG-SER240        | HBA         | 2.09            |
| <b>7h</b> | -8.74               | O58            | O-SER157         | HBD         | 2.59            |
|           |                     | O77            | N-ARG315         | HBA         | 2.37            |
| <b>6j</b> | -8.79               | O86            | OG-SER240        | HBA         | 2.49            |
|           |                     | O98            | N-ARG315         | HBA         | 2.26            |
|           |                     | O99            | N-ARG315         | HBA         | 2.23            |
| <b>6h</b> | -8.74               | N84            | NH1-ARG442       | HBA         | 2.18            |
|           |                     | O86            | N-ARG315         | HBA         | 1.83            |
| <b>6g</b> | -8.67               | O75            | NE2-HIS280       | HBA         | 1.95            |
|           |                     | O86            | OG-SER240        | HBA         | 2.11            |
| <b>6c</b> | -7.78               | O76            | NE2-HIS280       | HBA         | 2.19            |
|           |                     | O86            | OG-SER240        | HBA         | 2.48            |
|           |                     | O104           | NE2-GLN279       | HBA         | 2.38            |
| <b>6k</b> | -7.89               | O75            | NE2-HIS280       | HBA         | 2.35            |
| <b>7g</b> | -7.66               | O58            | OE2-GLU411       | HBD         | 2.32            |

|           |       |        |              |               |      |
|-----------|-------|--------|--------------|---------------|------|
|           |       | O78    | NE2-GLN279   | HBA           | 2.07 |
| <b>7k</b> | -7.04 | O77    | NE2-HIS280   | HBA           | 2.13 |
|           |       | O78    | NE2-HIS280   | HBA           | 2.12 |
| <b>6e</b> | -7.55 | O75    | NE2-HIS280   | HBA           | 1.96 |
| <b>6a</b> | -7.24 | N84    | NE2-HIS351   | HBA           | 2.53 |
| <b>7b</b> | -7.21 | O58    | NH1-ARG442   | HBA           | 2.87 |
|           |       | 6-ring | 6-ring-TYR72 | $\pi$ - $\pi$ | 3.85 |
| <b>7c</b> | -7.35 | O58    | OD2-ASP242   | HBD           | 1.67 |
| <b>6b</b> | -7.02 | O76    | NE2-HIS280   | HBA           | 2.08 |
|           |       | O86    | OG-SER240    | HBA           | 2.44 |
| <b>7a</b> | -7.11 | N87    | NE2-HIS280   | HBA           | 2.27 |
|           |       | 5-ring | CD2-PHE303   | $\pi$ -H      | 3.61 |
| <b>6d</b> | -7.05 | O75    | NE2-GLN279   | HBA           | 2.30 |
|           |       | F98    | NE2-HIS351   | HBA           | 1.86 |
| <b>7e</b> | -7.45 | O88    | OG-SER240    | HBA           | 2.13 |
| <b>7f</b> | -7.53 | N87    | NE2-GLN279   | HBA           | 3.09 |
|           |       | F102   | NE2-HIS112   | HBA           | 2.98 |
| <b>7d</b> | -6.98 | F100   | NH2-ARG213   | HBA           | 2.88 |
| <b>7j</b> | -6.36 | O58    | OD1-ASP215   | HBD           | 1.97 |
|           |       | O58    | OD2-ASP215   | HBD           | 2.37 |



|                 |       |        |                   |               |      |
|-----------------|-------|--------|-------------------|---------------|------|
|                 |       | O88    | NE2-GLN279        | HBA           | 1.89 |
|                 |       | O78    | NE2-HIS351        | HBA           | 2.20 |
|                 |       | 6-ring | 6-ring-<br>PHE301 | $\pi$ - $\pi$ | 3.29 |
|                 |       | O75    | NH1-ARG442        | HBA           | 2.21 |
|                 |       | O99    | ND2-ASN350        | HBA           | 2.21 |
| <b>6i</b>       | -6.45 | N85    | NE2-HIS351        | HBA           | 2.40 |
|                 |       | O86    | NH1-ARG315        | HBA           | 2.83 |
|                 |       | 5-ring | NE2-HIS351        | $\pi$ -H      | 3.48 |
|                 |       | O58    | O-TYR158          | HBD           | 2.78 |
|                 |       | C11    | 5-ring-HIS280     | $\pi$ -H      | 4.09 |
| <b>7i</b>       | -6.59 | C10    | 5-ring-HIS280     | $\pi$ -H      | 3.93 |
|                 |       | 6-ring | 6-ring-<br>PHE303 | $\pi$ - $\pi$ | 3.54 |
| <b>3</b>        | -6.15 | O75    | NH1-ARG442        | HBA           | 2.01 |
| <b>4</b>        | -6.20 | O58    | NH1-ARG442        | HBA           | 2.13 |
|                 |       | O58    | OD1-ASP215        | HBD           | 2.73 |
| <b>2 (KBA)</b>  | -4.44 | O78    | NH1-ARG442        | HBA           | 2.87 |
|                 |       | O83    | NH2-ARG213        | HBA           | 1.69 |
| <b>1 (AKBA)</b> | -3.23 | O84    | NE2-HIS351        | HBA           | 1.98 |

HBA = Hydrogen bond acceptor, HBD = Hydrogen bond donor.

**Table S2.** Crystal data of the compound **4**.

| <b>Compound</b>                                                               | <b>4</b>                                                    |
|-------------------------------------------------------------------------------|-------------------------------------------------------------|
| Chemical formula                                                              | C <sub>33</sub> H <sub>47</sub> O <sub>4</sub>              |
| Mr                                                                            | 507.70                                                      |
| Crystal system, space group                                                   | Orthorhombic, P2 <sub>1</sub> 2 <sub>1</sub> 2 <sub>1</sub> |
| Temperature (K)                                                               | 296                                                         |
| a (Å)                                                                         | 13.834(5)                                                   |
| b (Å)                                                                         | 23.617(8)                                                   |
| c (Å)                                                                         | 8.757(3)                                                    |
| $\alpha$ (°)                                                                  | 90                                                          |
| $\beta$ (°)                                                                   | 90                                                          |
| $\gamma$ (°)                                                                  | 90                                                          |
| V (Å <sup>3</sup> )                                                           | 2861.0(17)                                                  |
| Z                                                                             | 4                                                           |
| $\mu$ (mm <sup>-1</sup> )                                                     | 0.08                                                        |
| Absorption correction                                                         | Multi-scan, SADABS                                          |
| T <sub>min</sub> , T <sub>max</sub>                                           | 0.6596, 0.7451                                              |
| No. of measured, independent and<br>observed [I > 2 $\sigma$ (I)] reflections | 43500, 4914, 3977                                           |
| R <sub>int</sub>                                                              | 0.0770                                                      |
| (sin $\theta$ / $\lambda$ ) <sub>max</sub> (Å <sup>-1</sup> )                 | 0.591                                                       |
| R[F <sup>2</sup> > 2 $\sigma$ (F <sup>2</sup> )], wR(F <sup>2</sup> ), S      | 0.0418, 0.1056, 1.043                                       |
| No. of reflections                                                            | 4914                                                        |
| No. of parameters                                                             | 344                                                         |
| No. of restraints                                                             | 1                                                           |
| $\Delta\rho_{\text{max}}$ , $\Delta\rho_{\text{min}}$ (eÅ <sup>-3</sup> )     | 0.164, -0.163                                               |
